# Supplementary material for: Synthesis of Streptococcus pneumoniae serotype 9V oligosaccharide antigens
Source: publisher site journal article supplement (doi:10.3762/bjoc.16.140), 2020-07-15

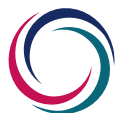

## Supporting Information

for

### Synthesis of *Streptococcus pneumoniae* serotype 9V oligosaccharide antigens

Sharavathi G. Parameswarappa, Claney L. Pereira and Peter H. Seeberger

*Beilstein J. Org. Chem.* **2020**, *16*, 1693–1699. [doi:10.3762/bjoc.16.140](https://doi.org/10.3762/bjoc.16.140)

## NMR Spectra

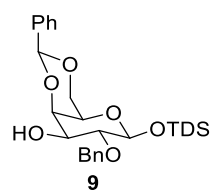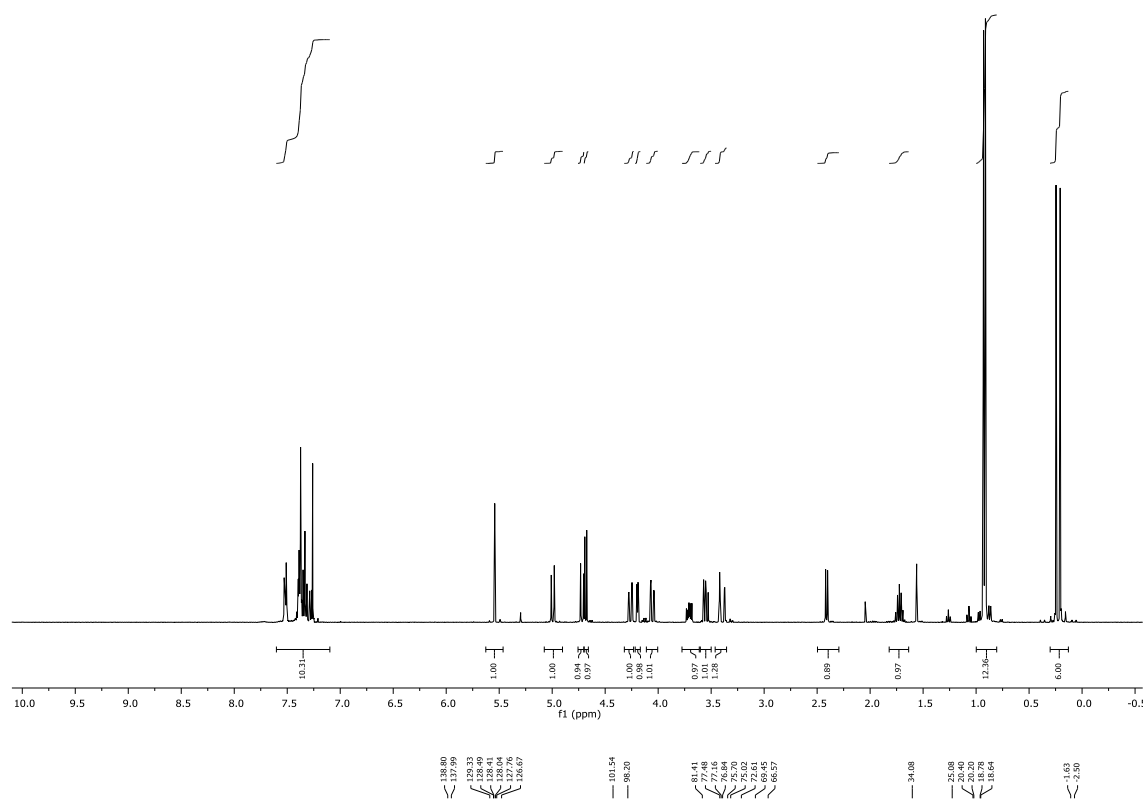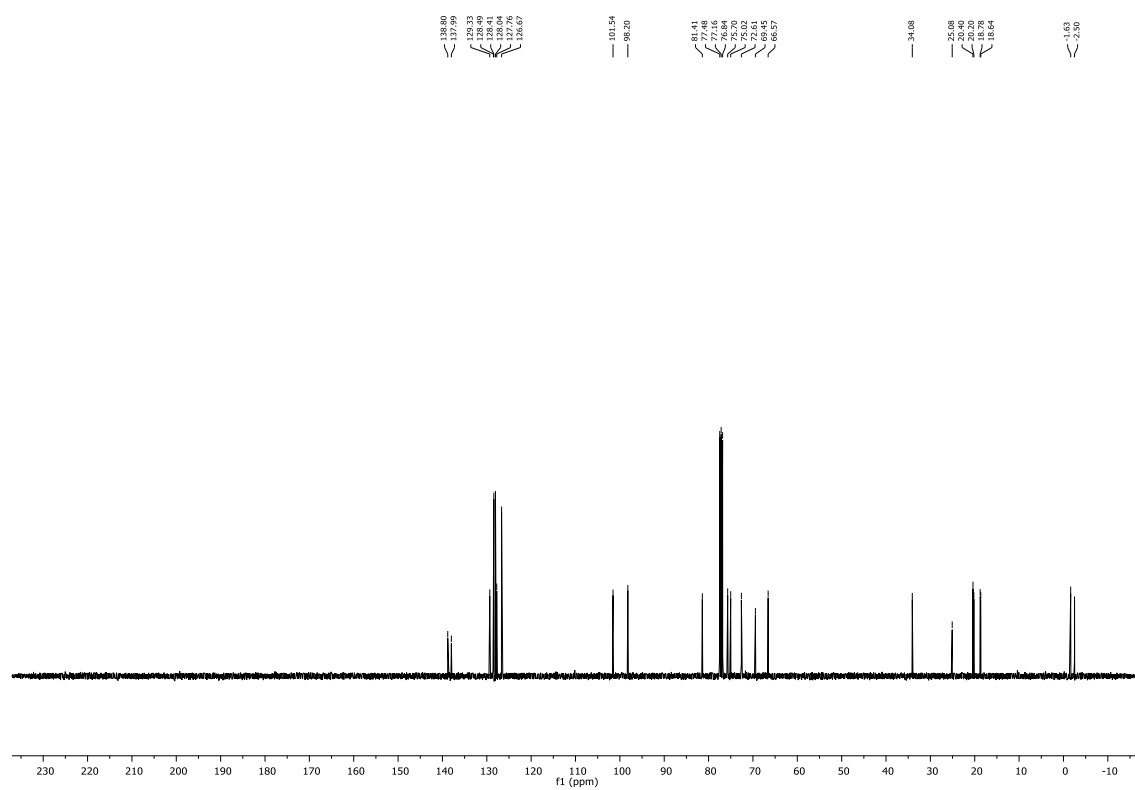

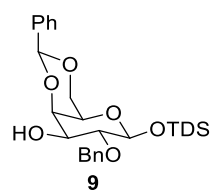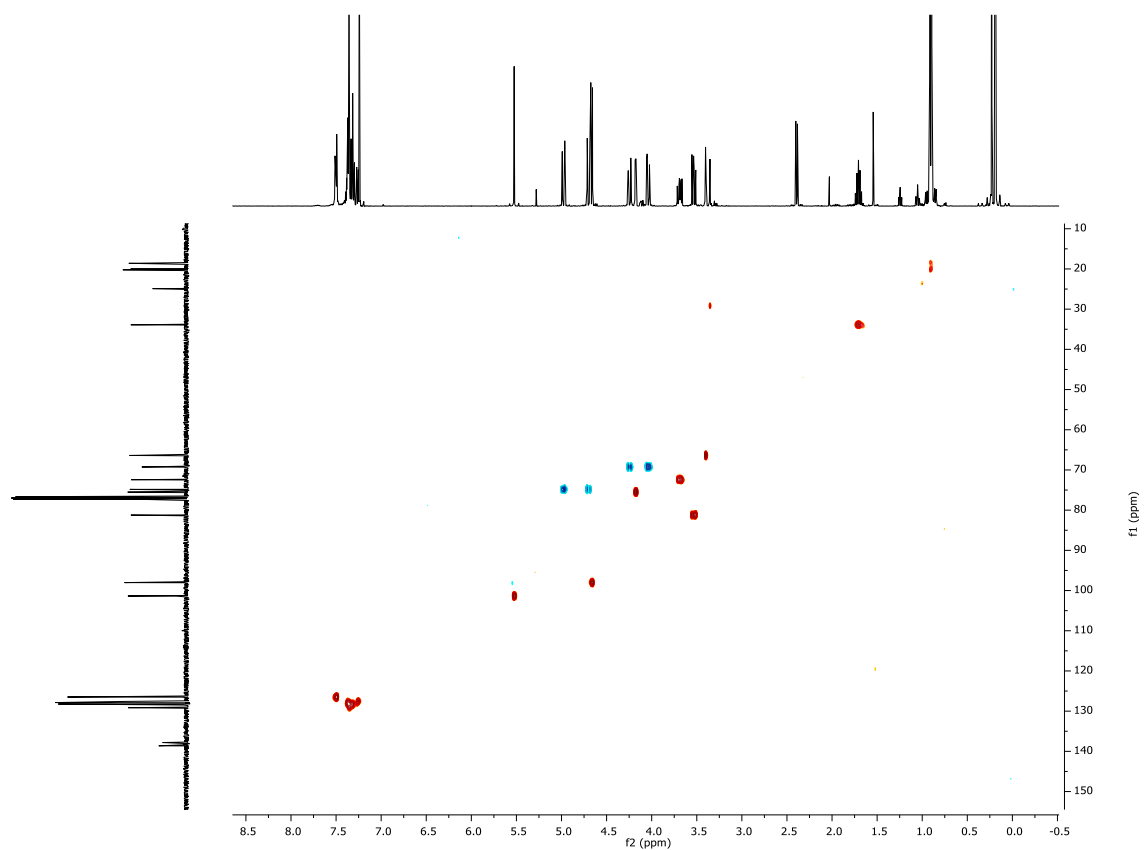

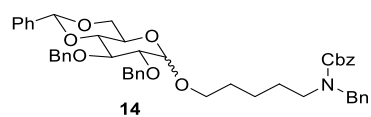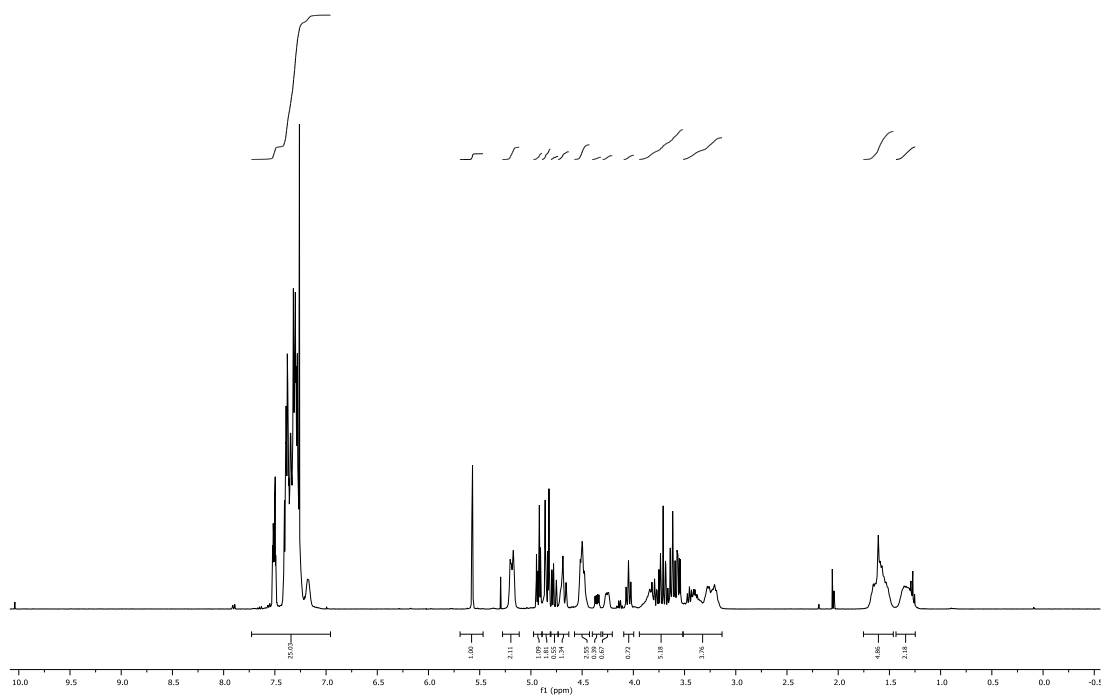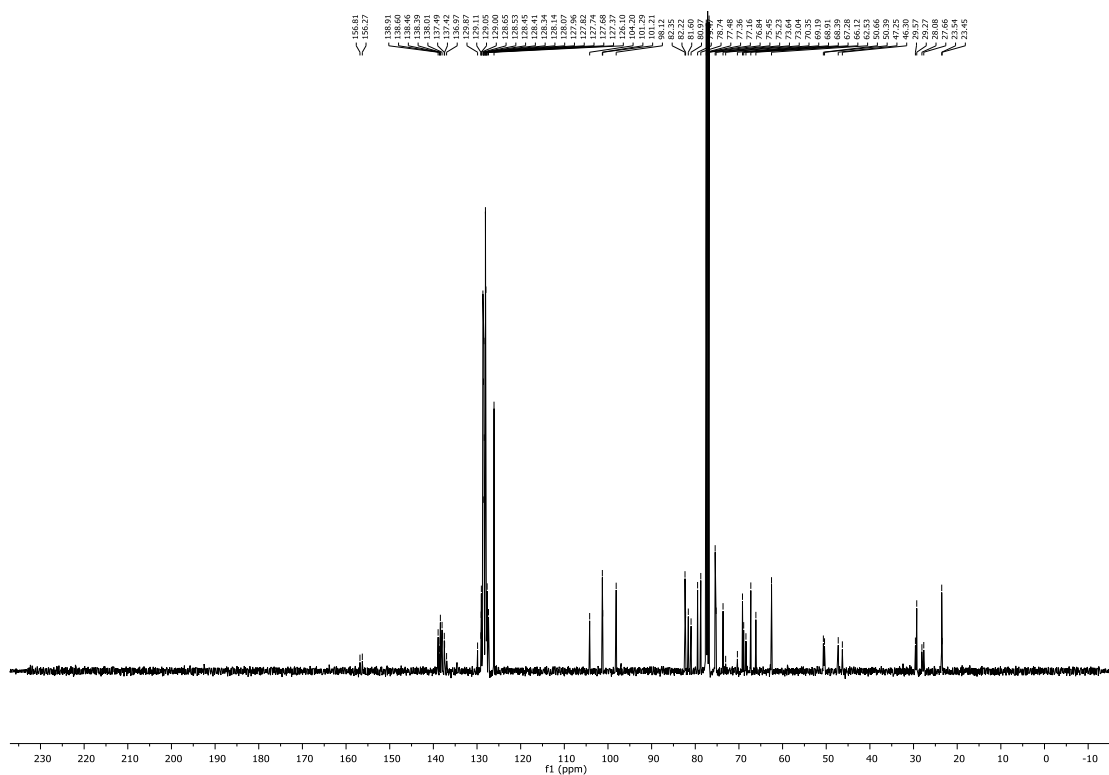



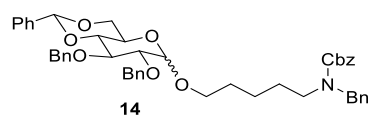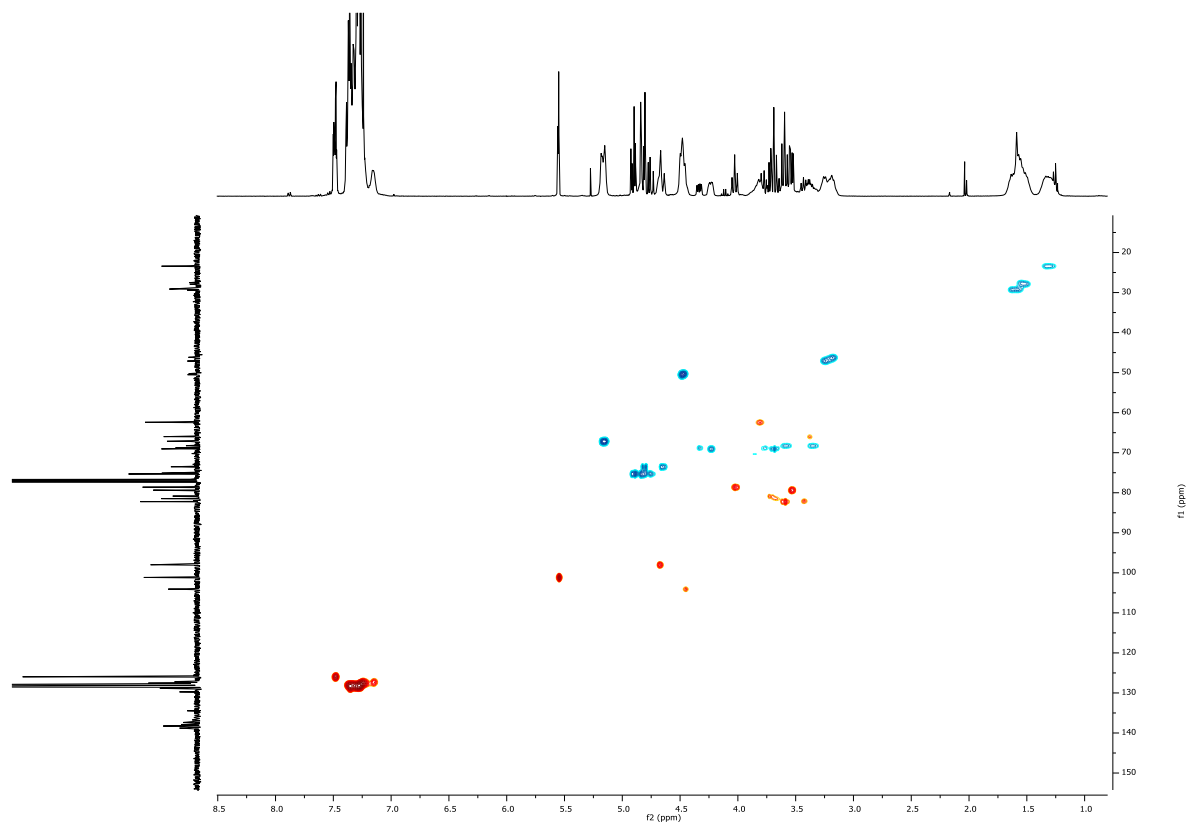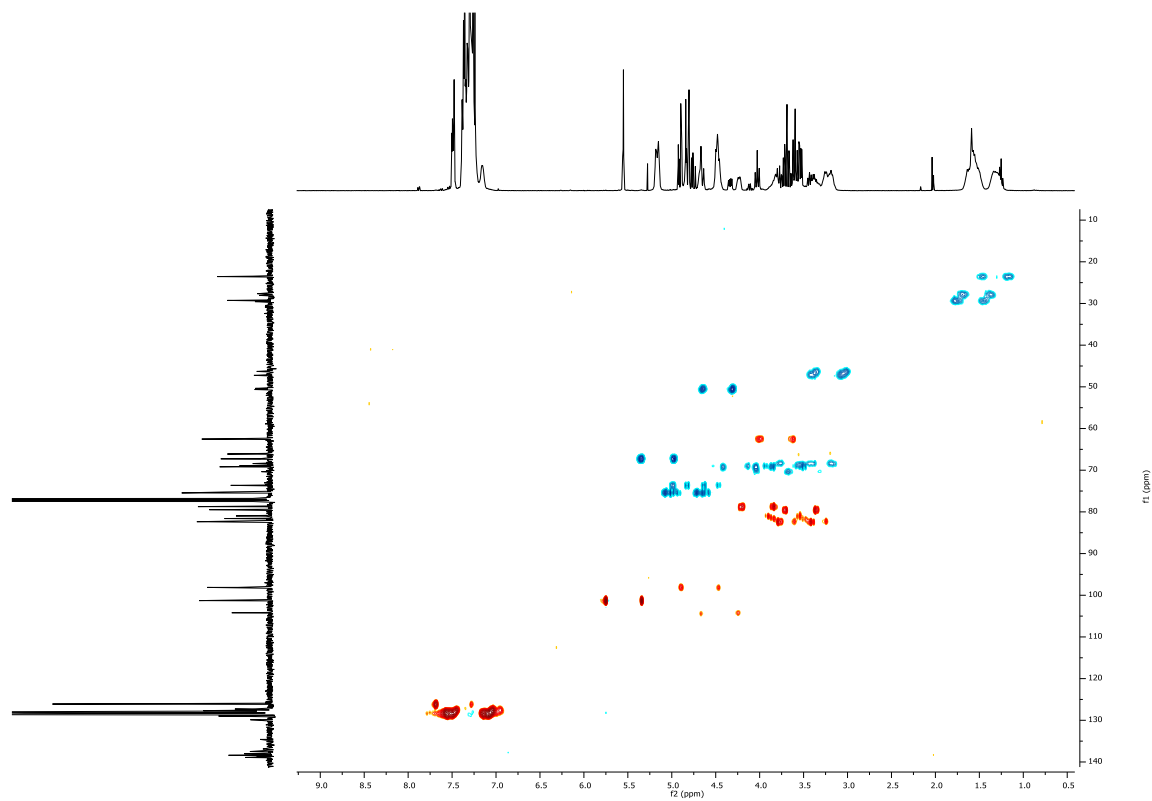

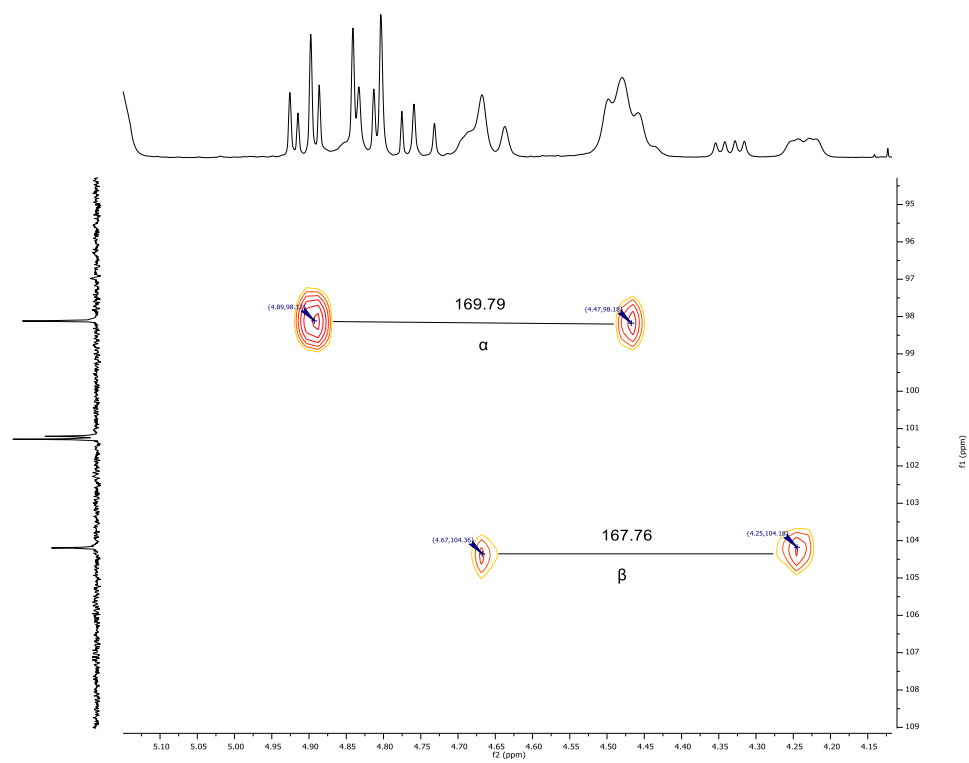

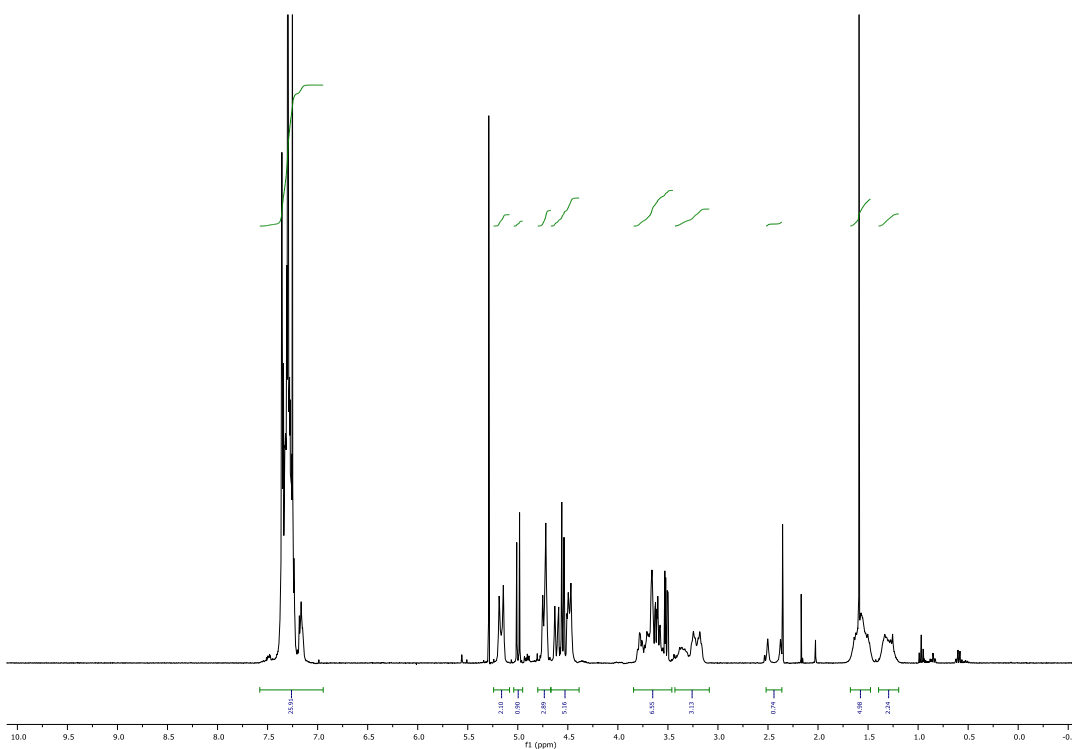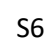

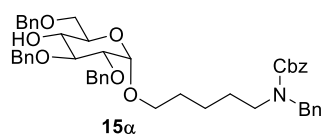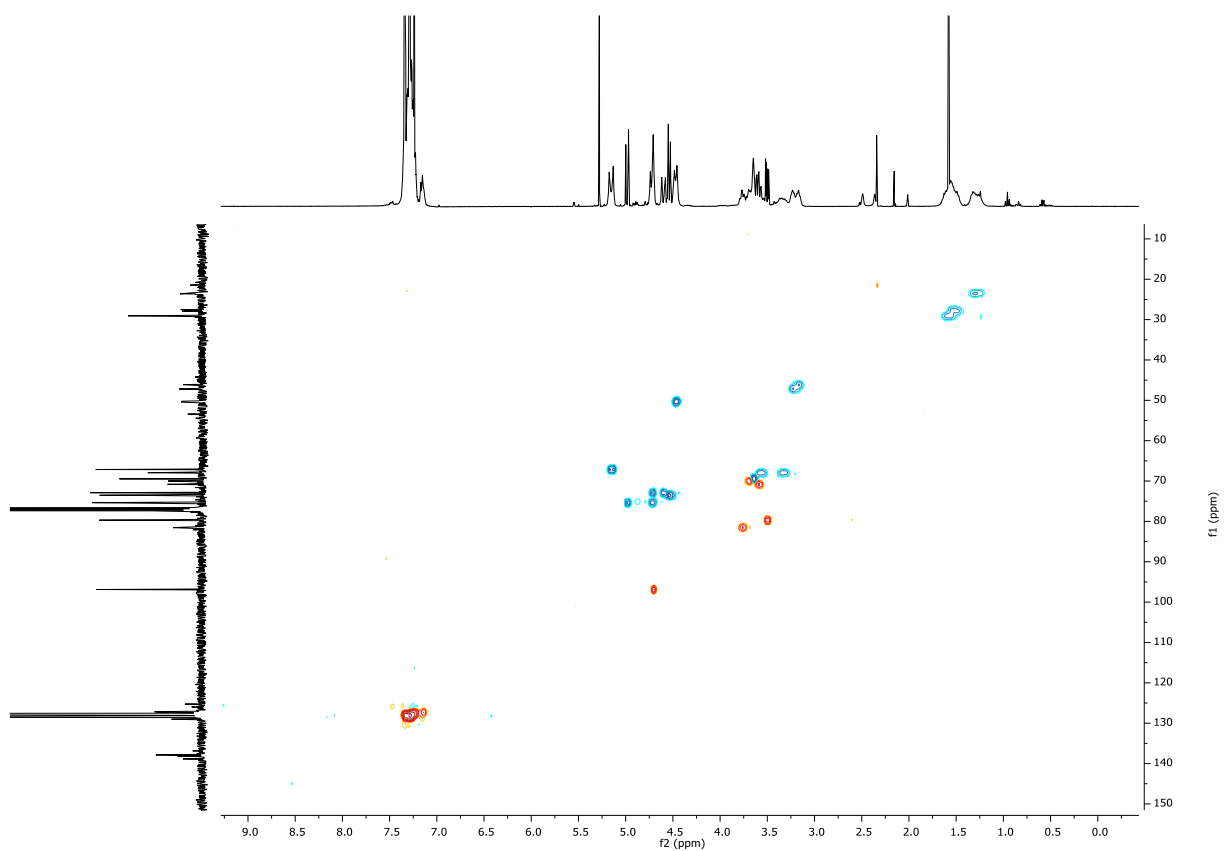

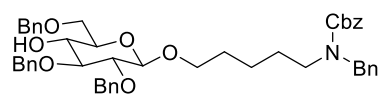

15 $\beta$

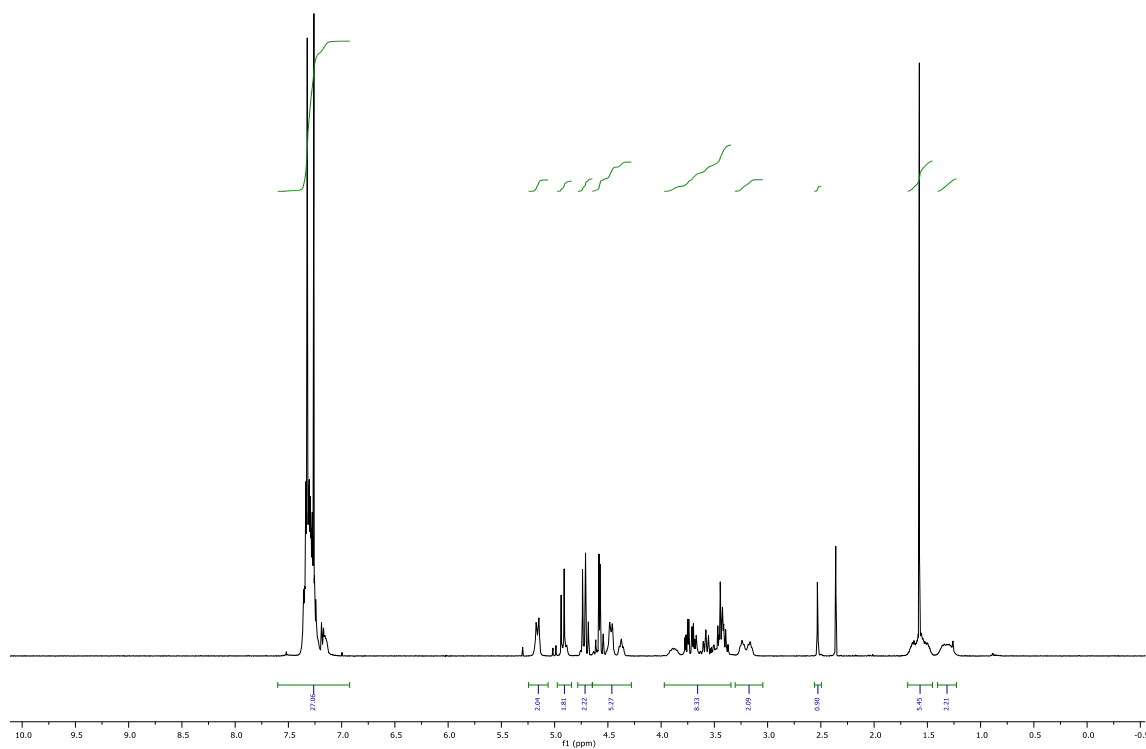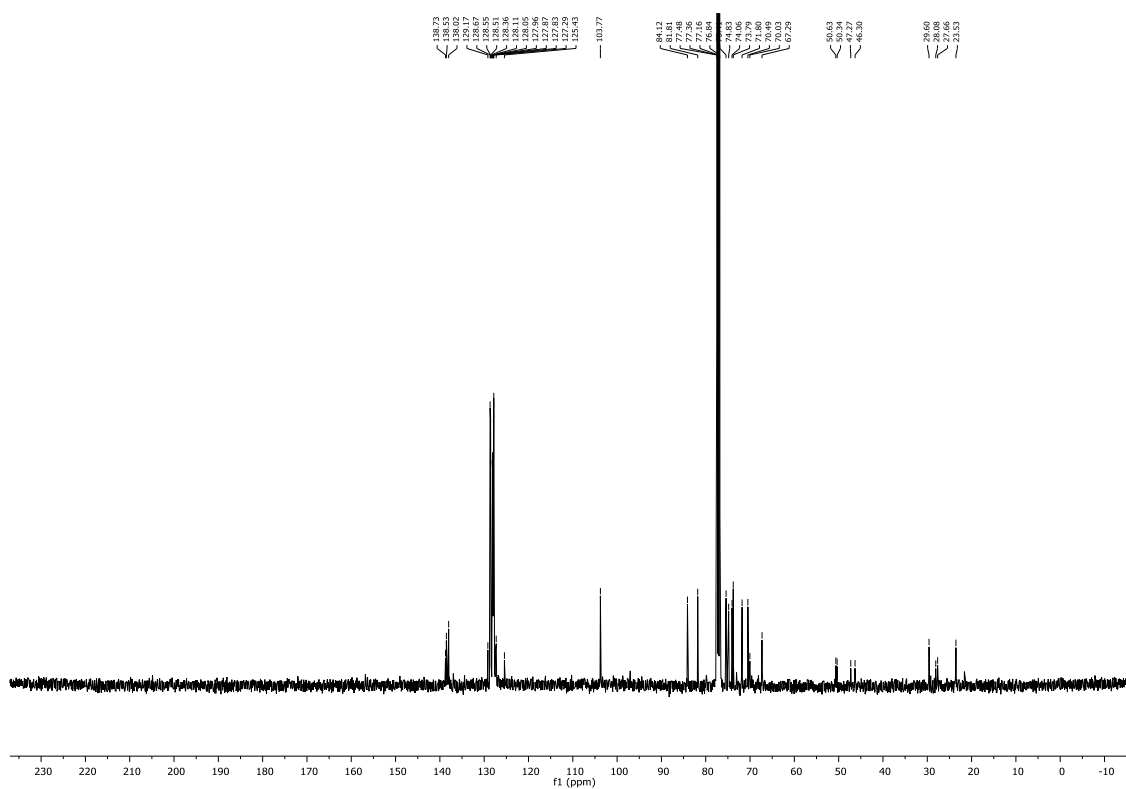



15 $\beta$

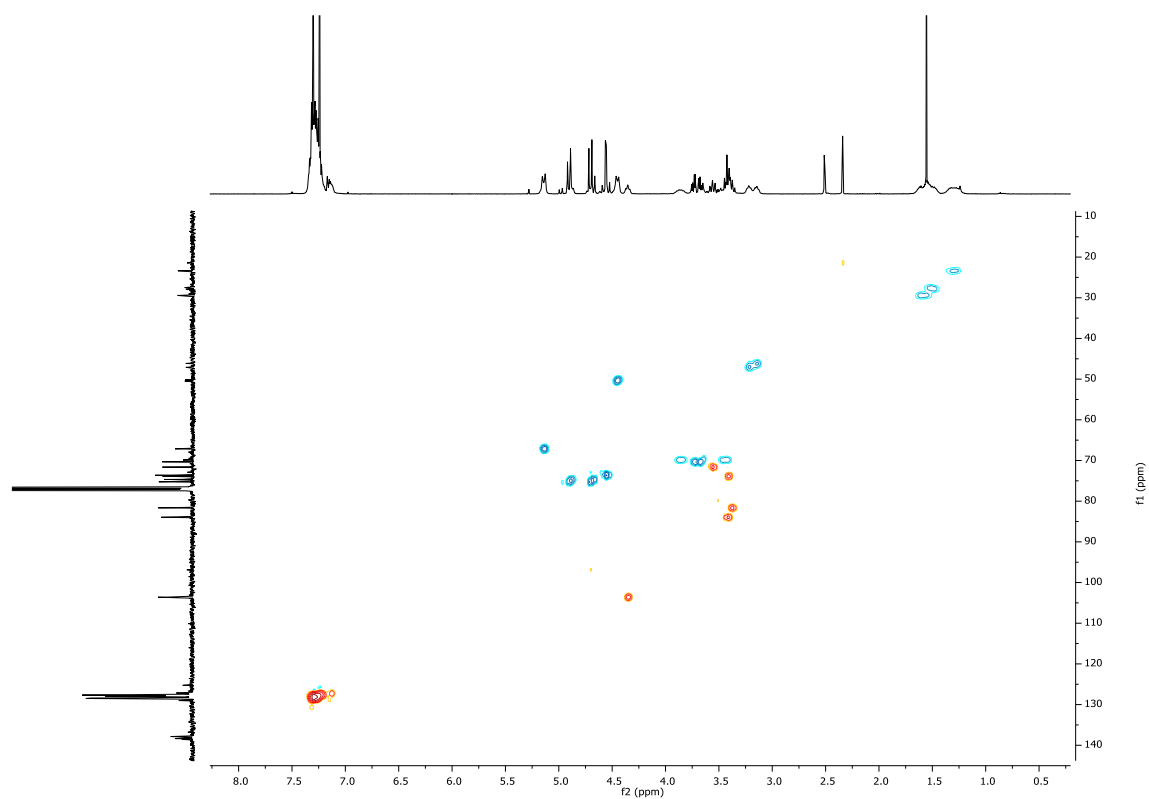

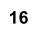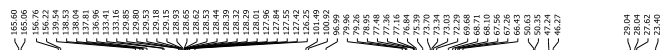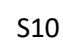

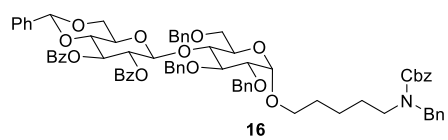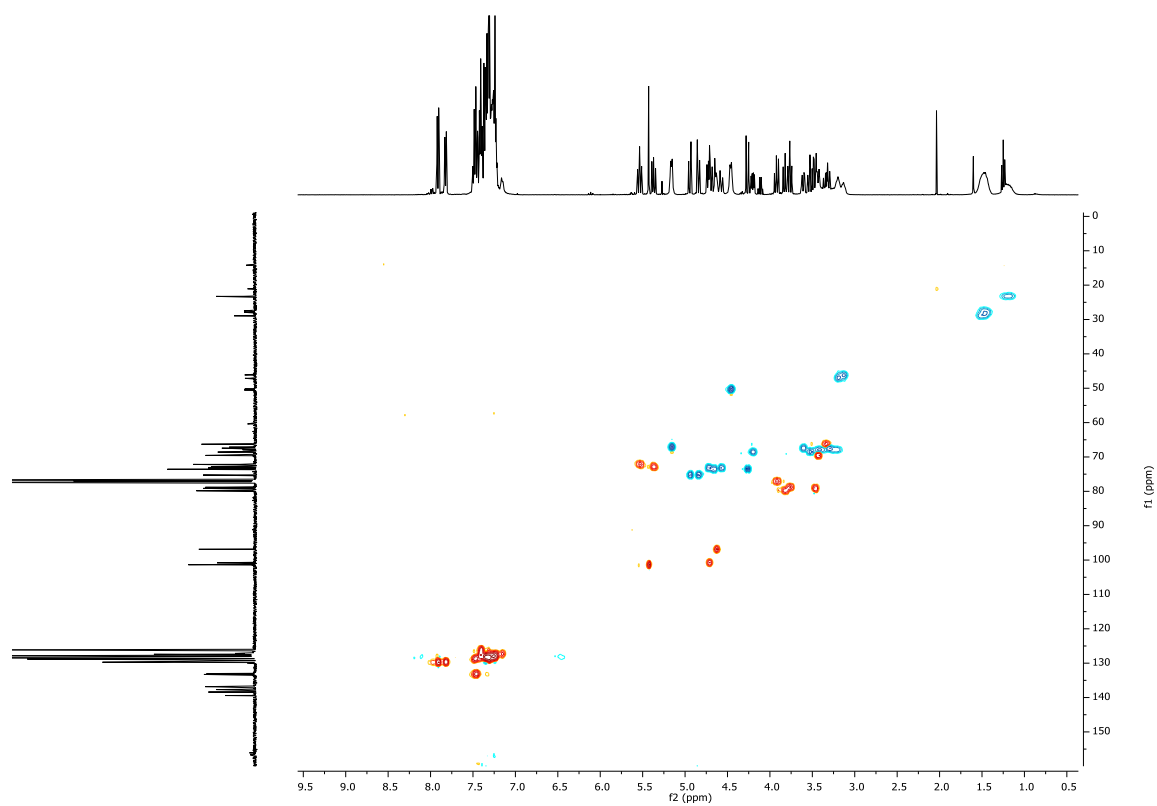



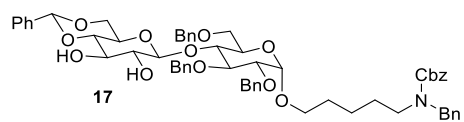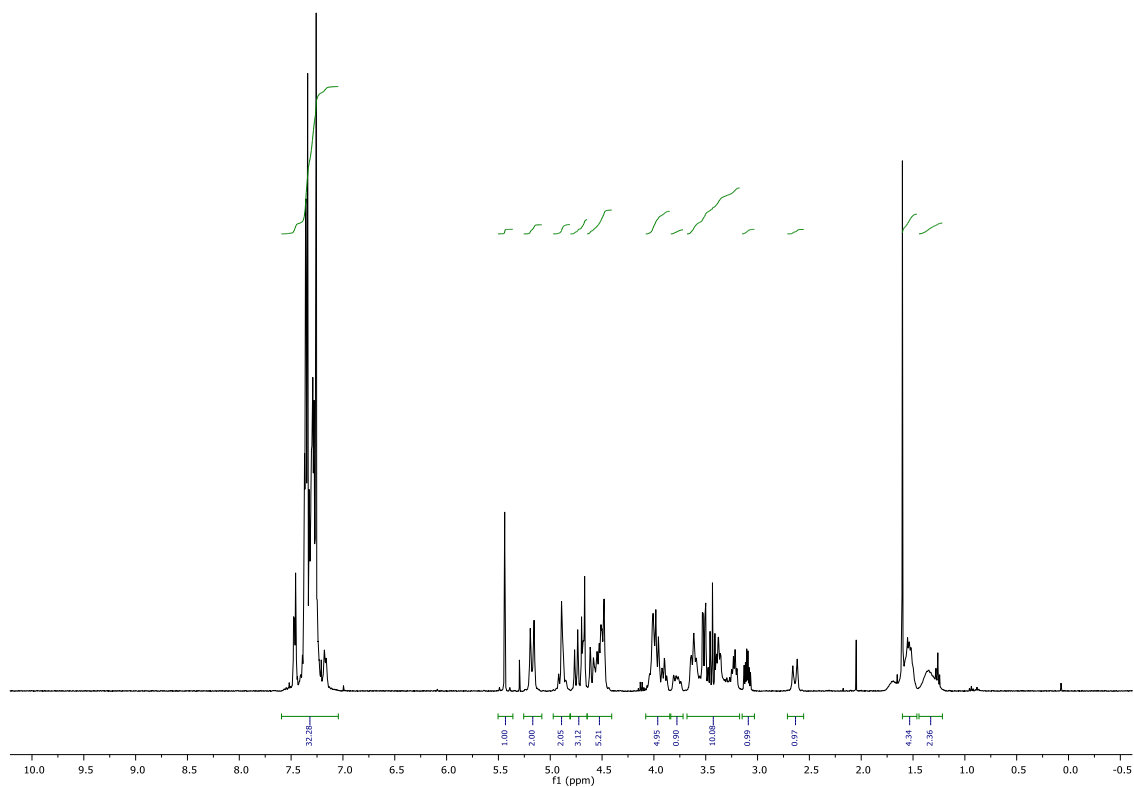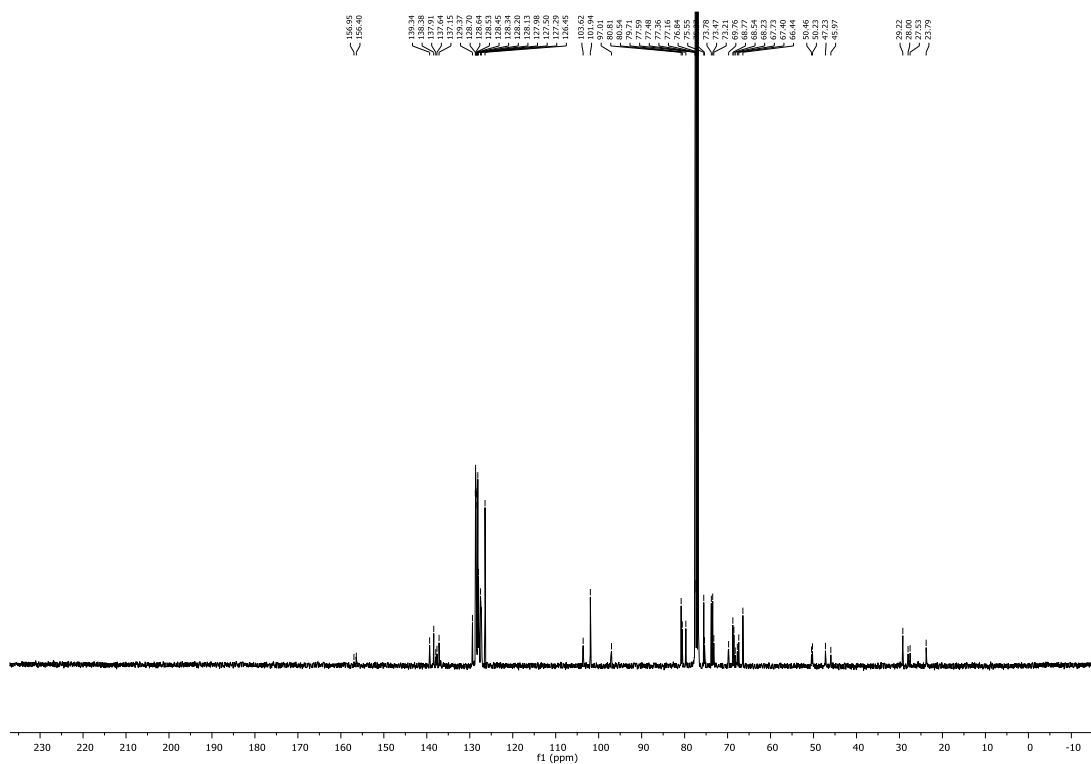

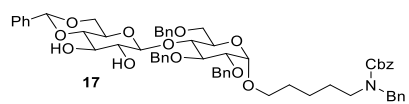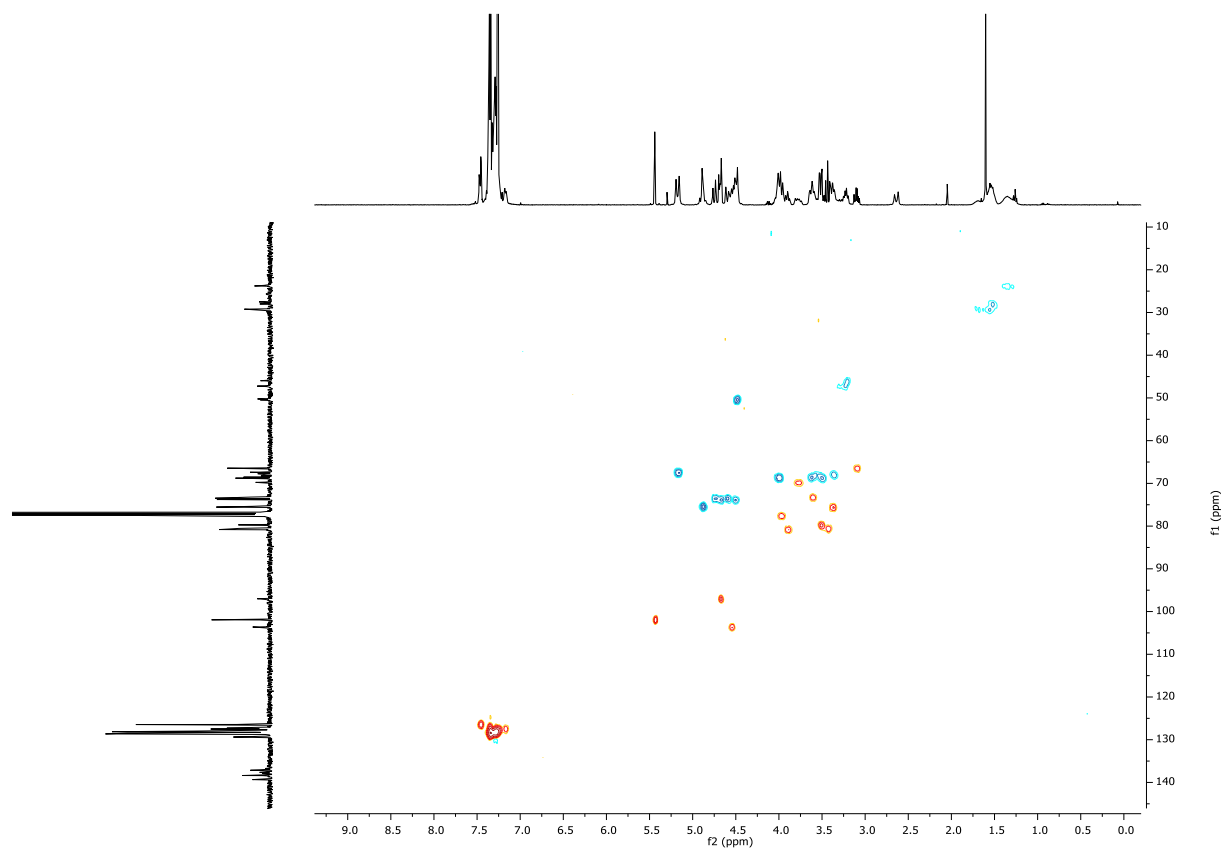

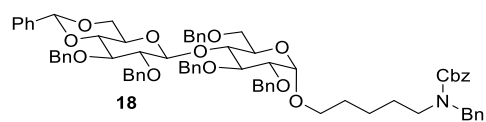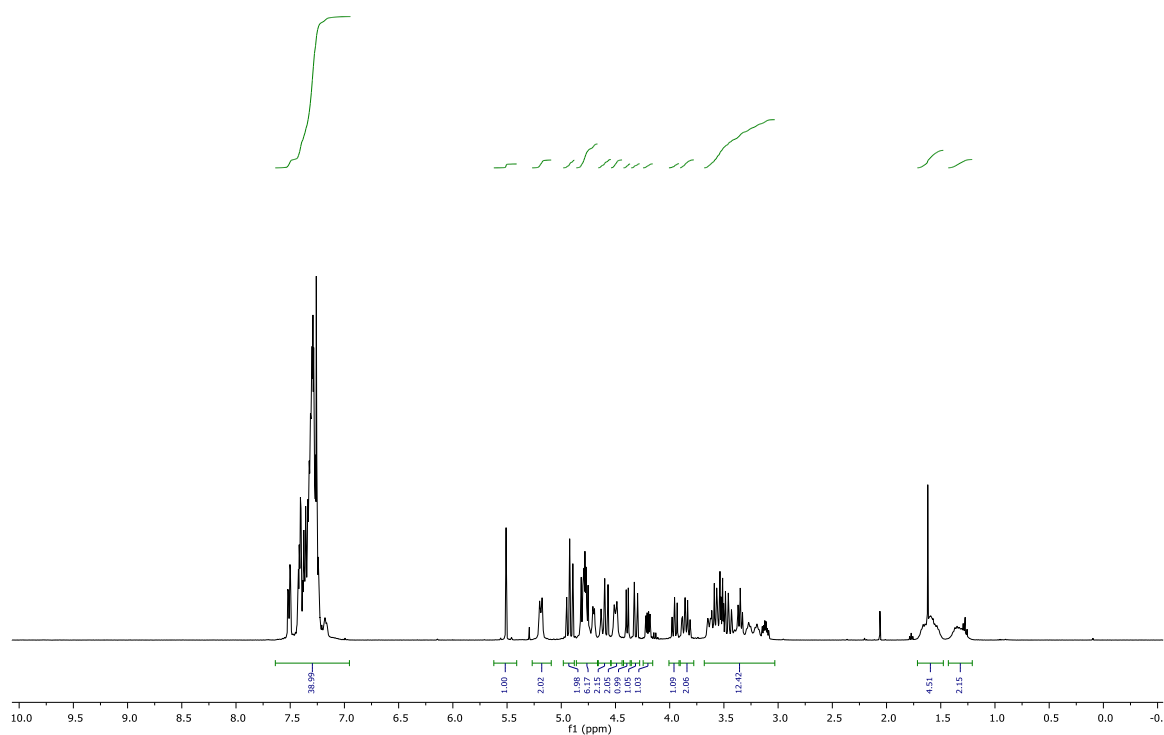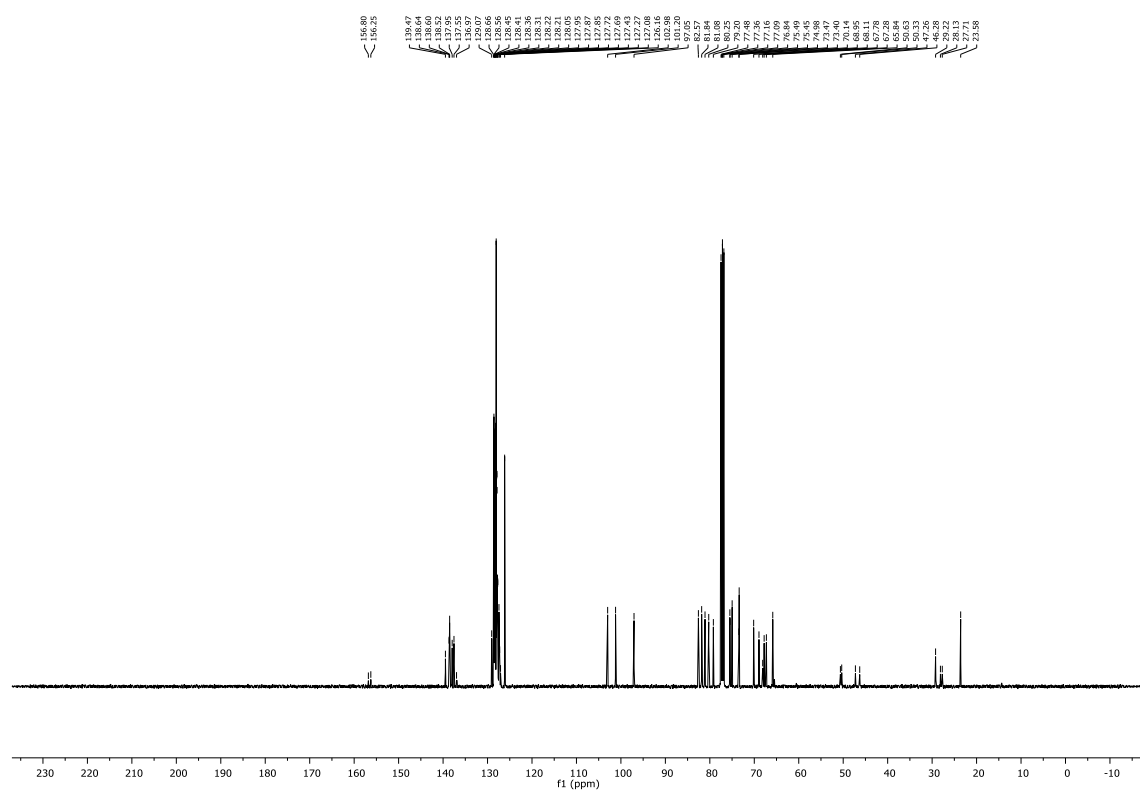

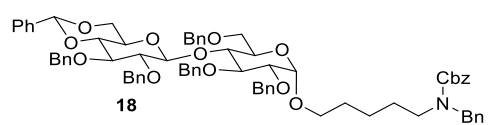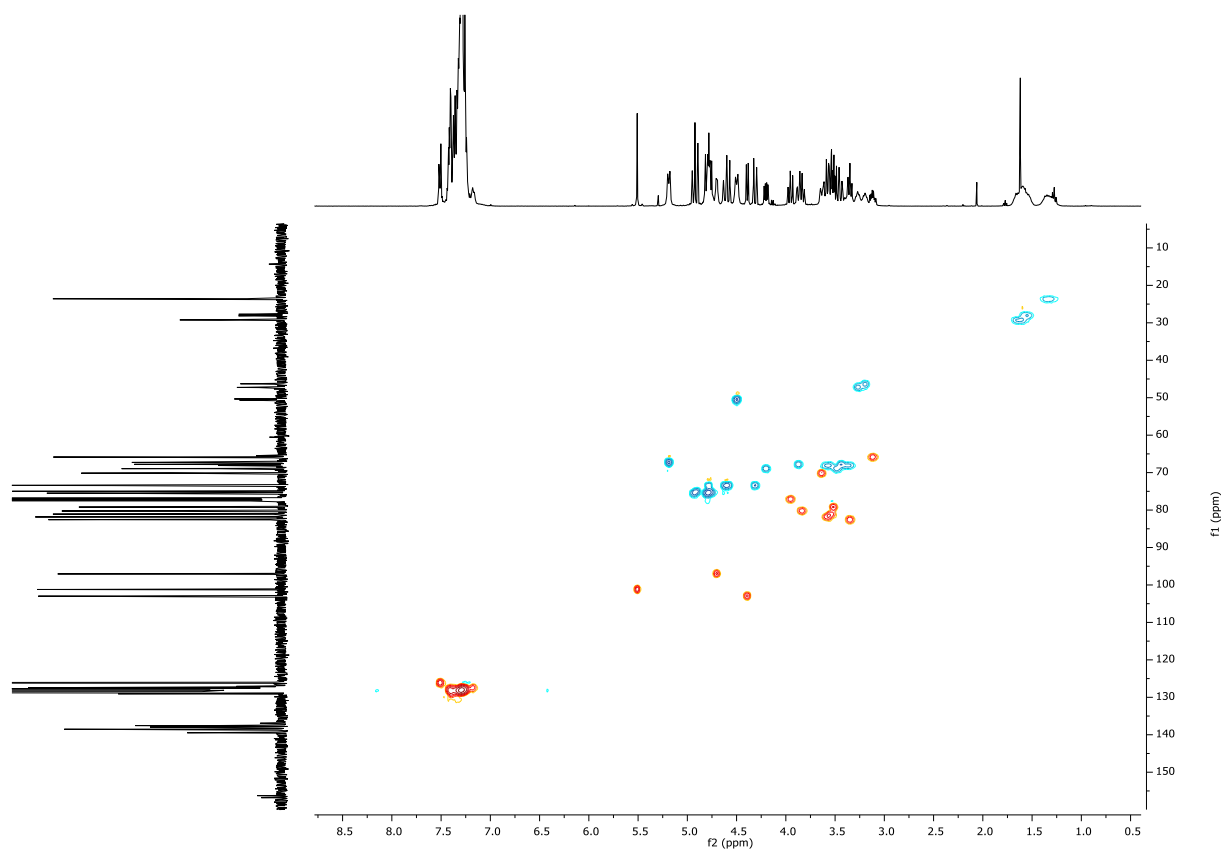

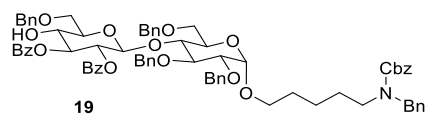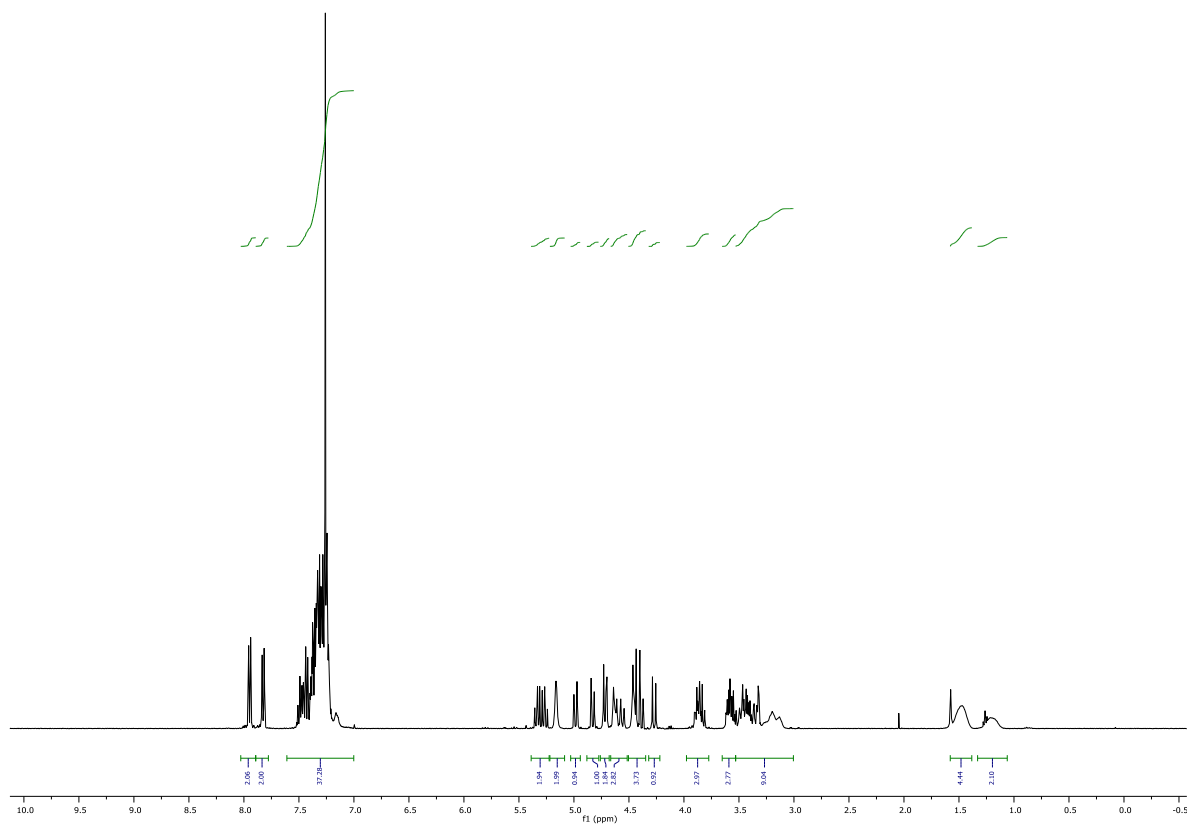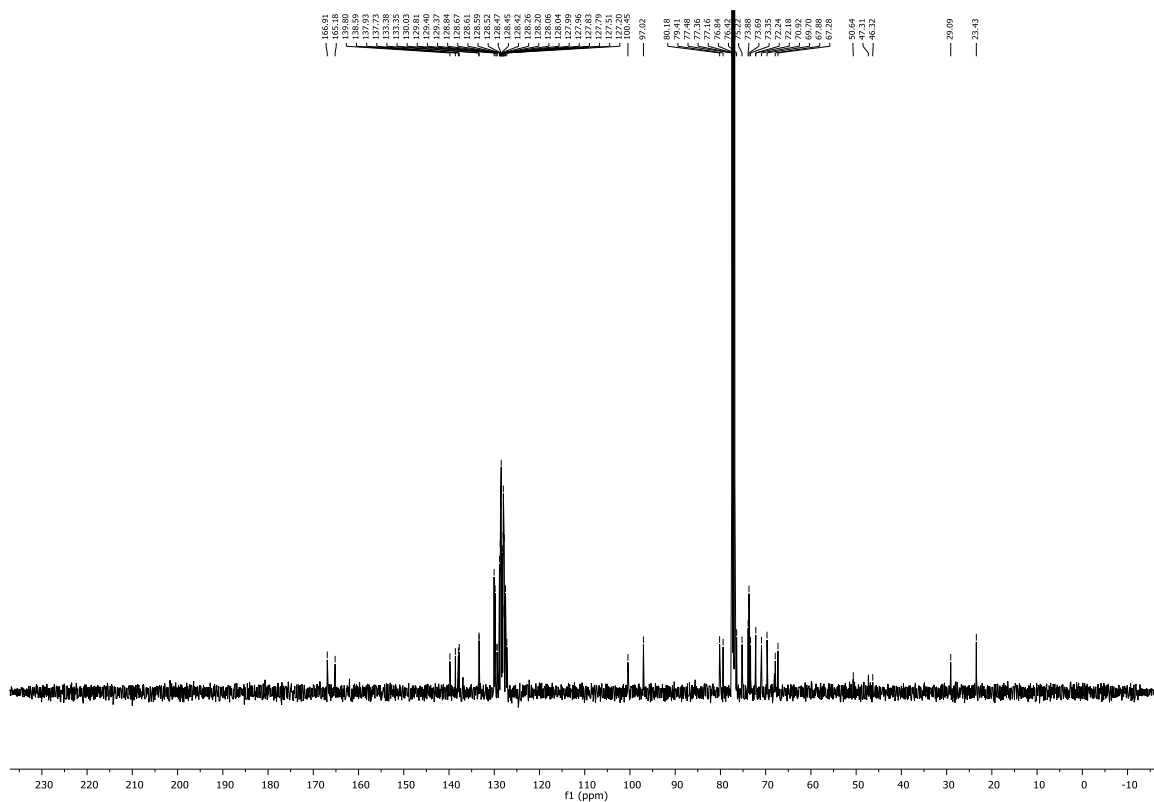

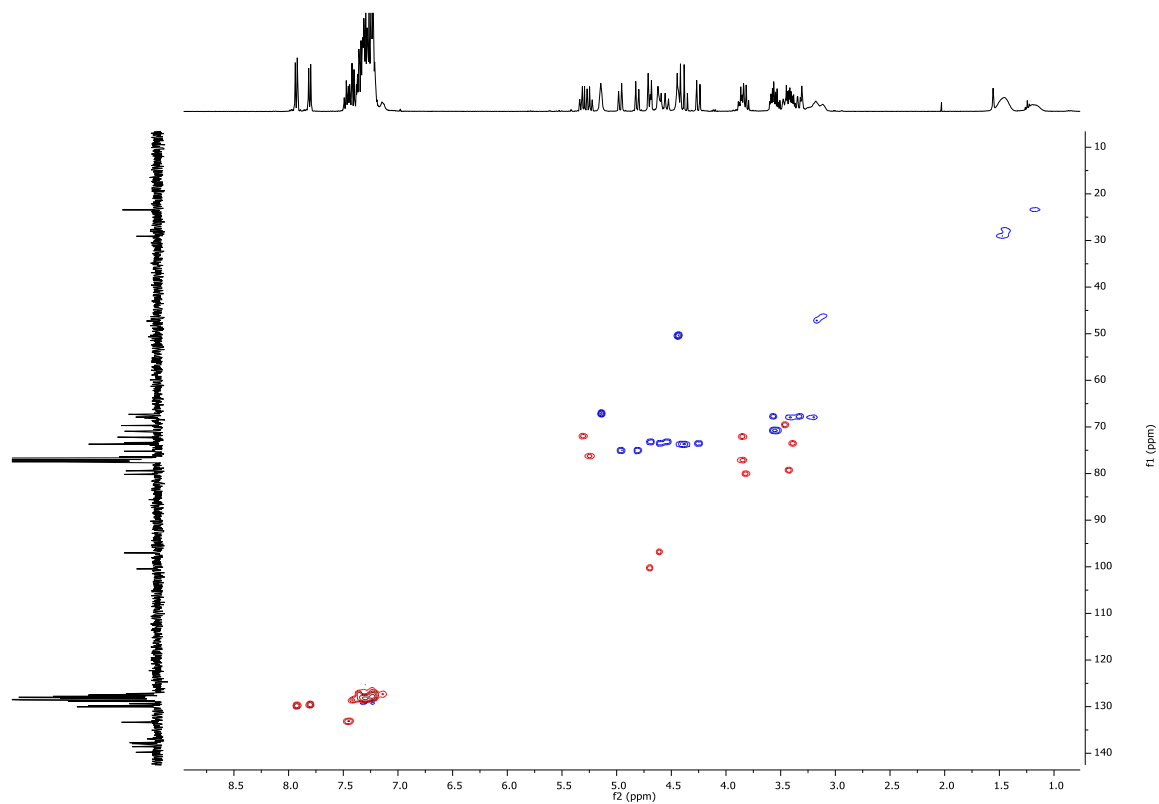

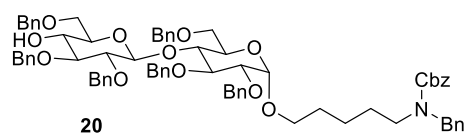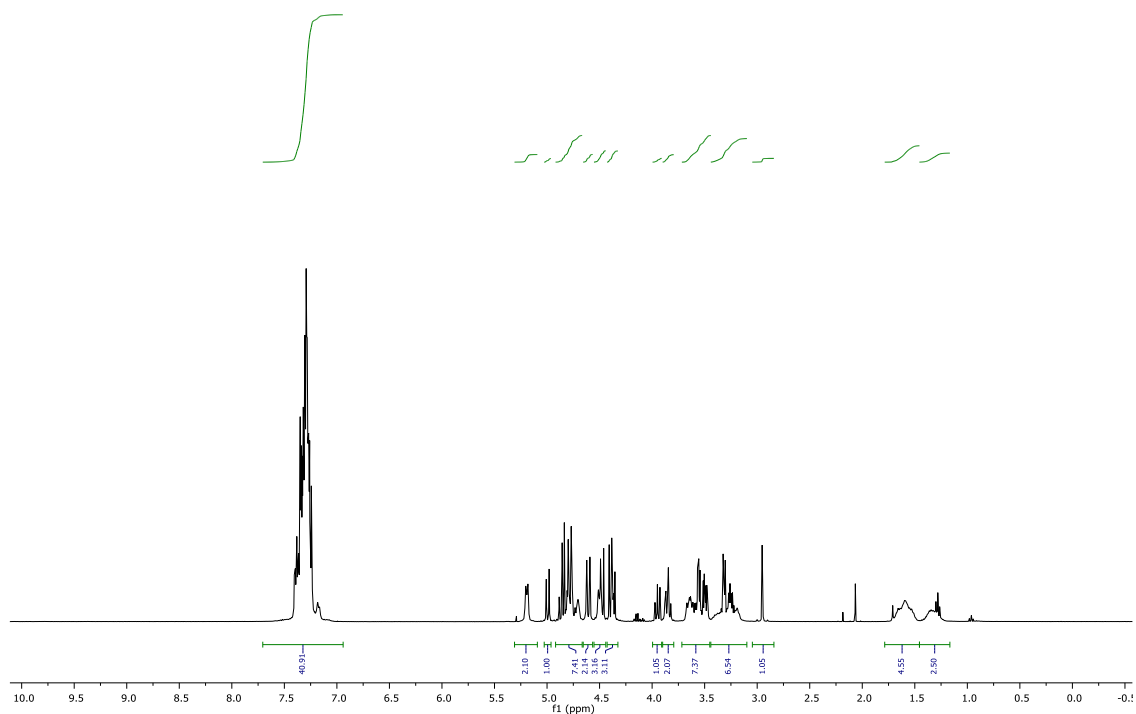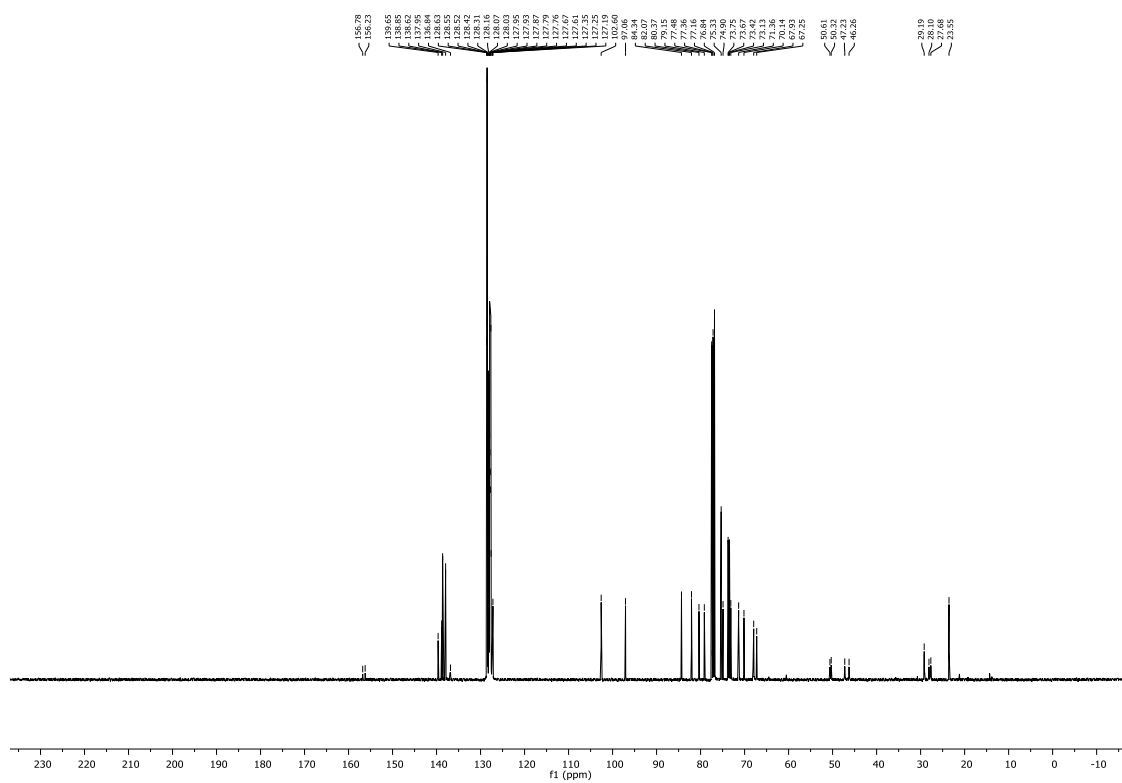

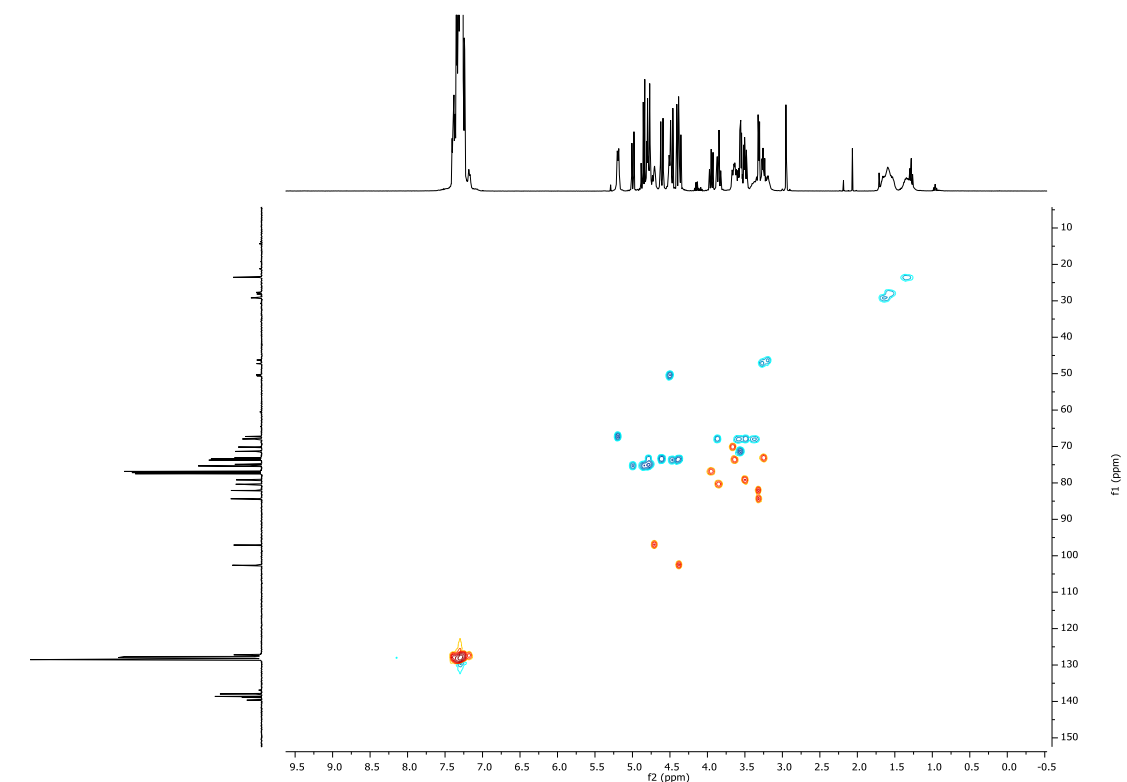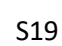



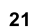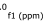

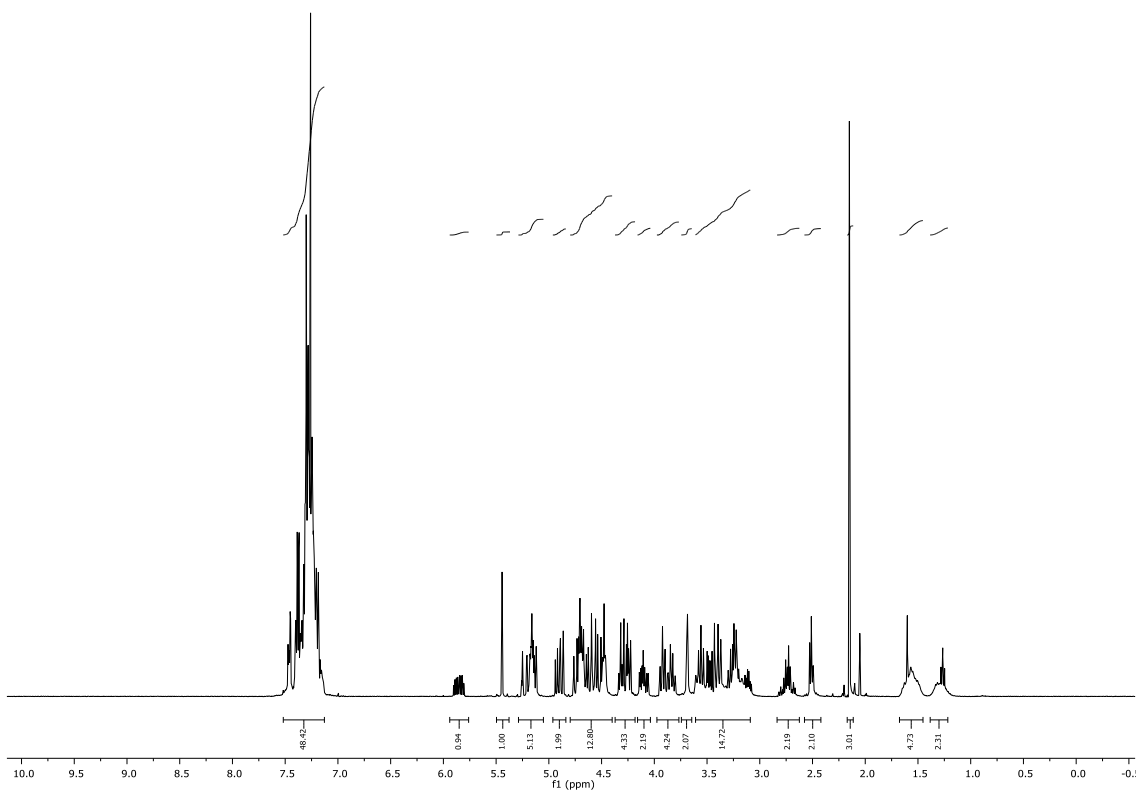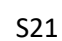

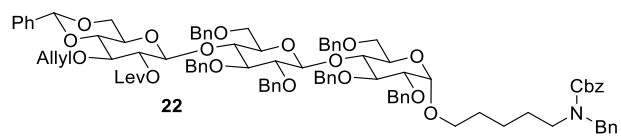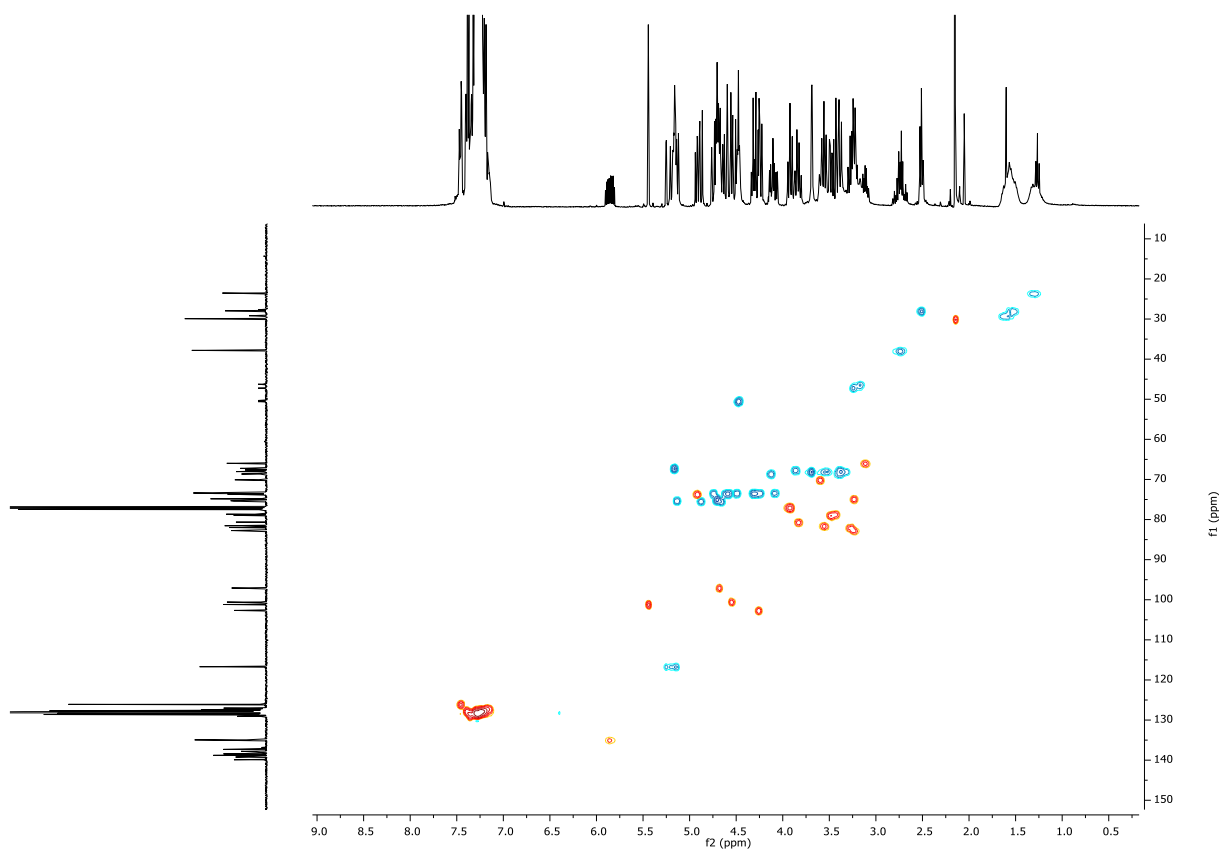

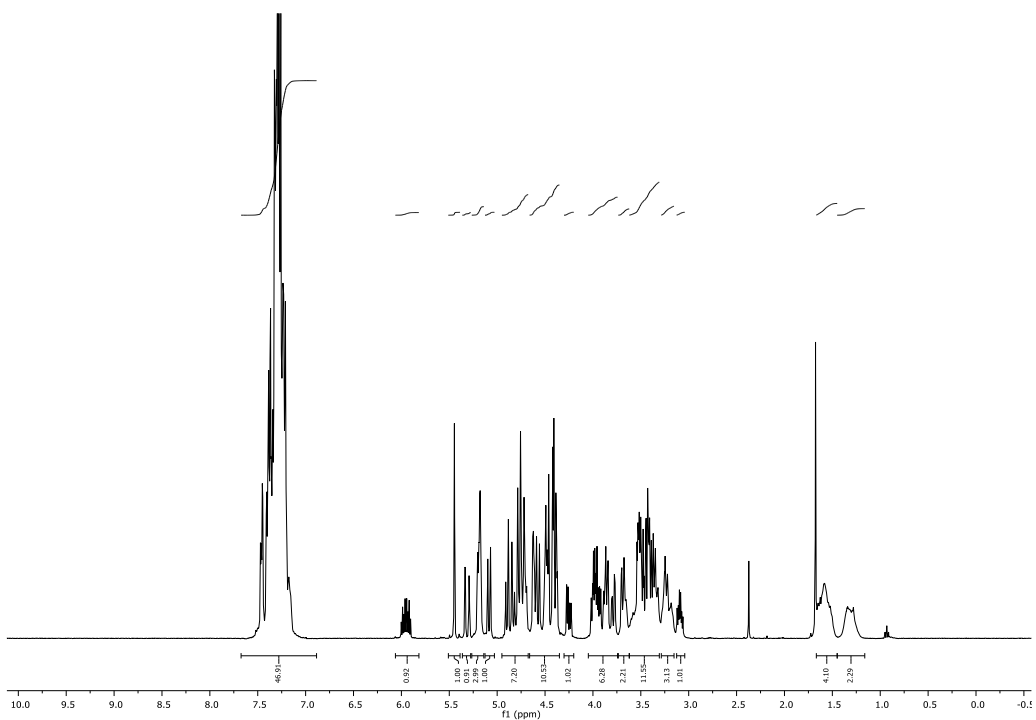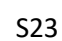

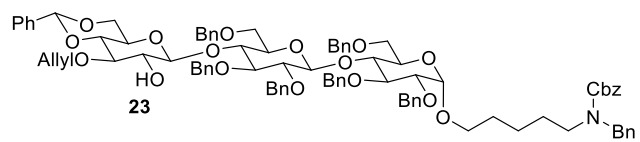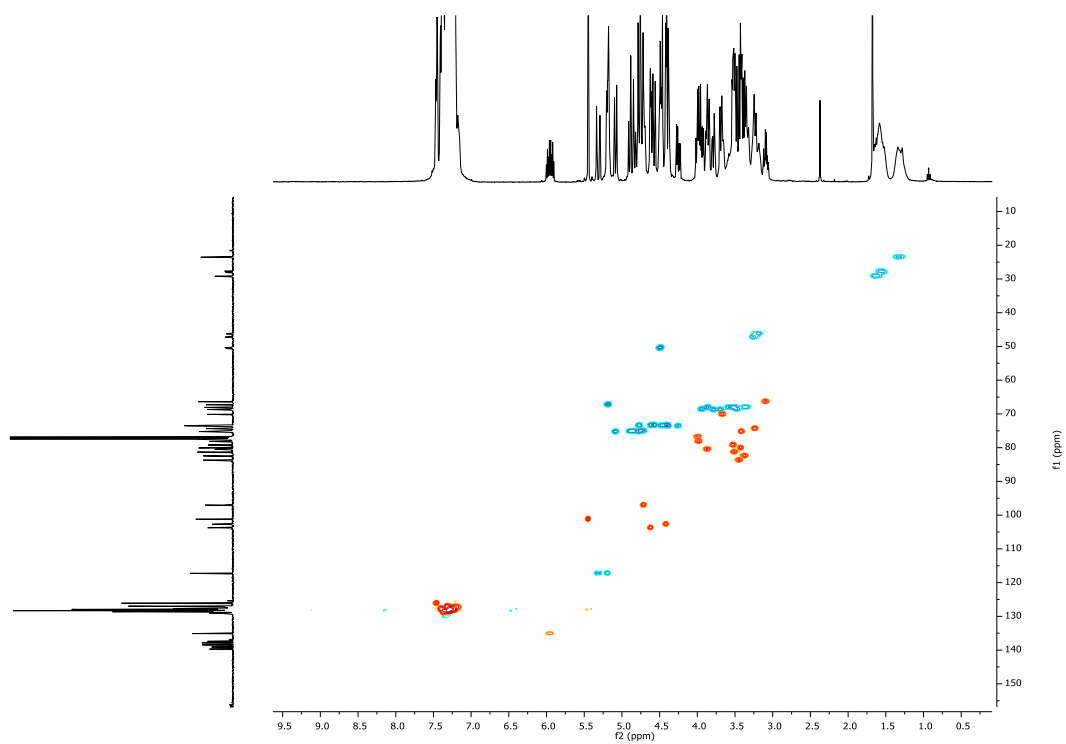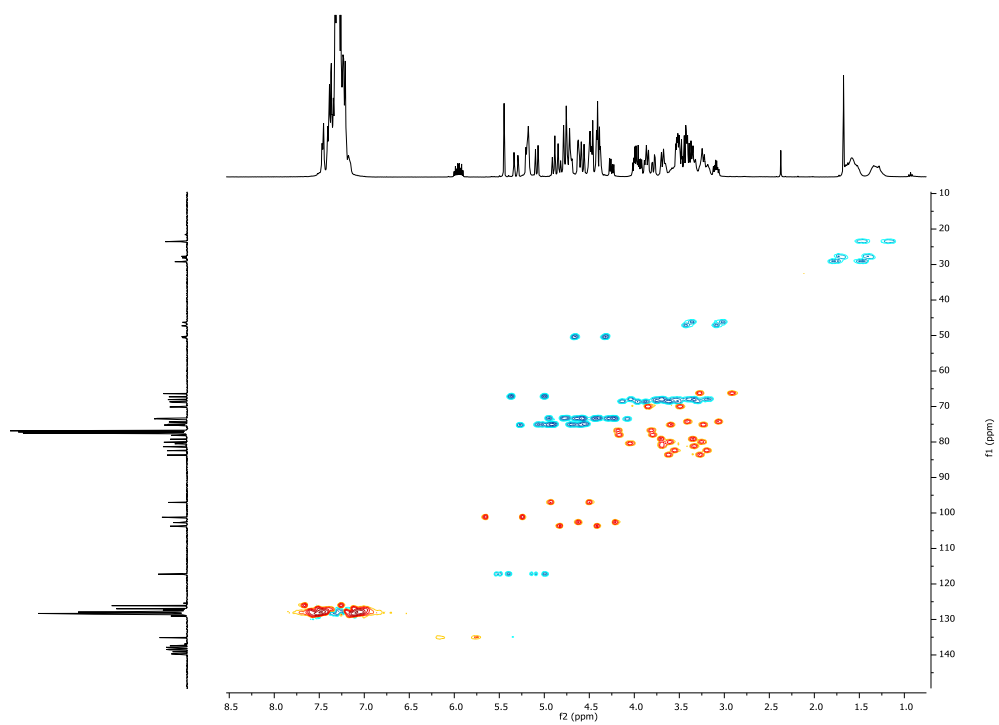

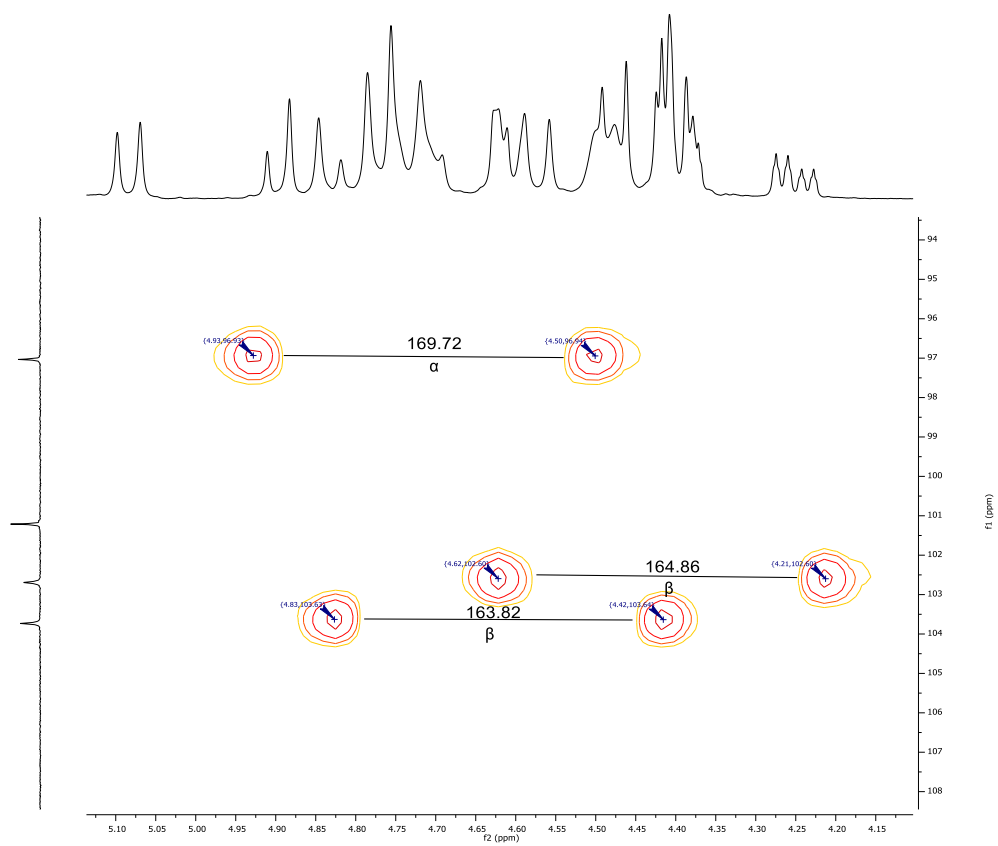

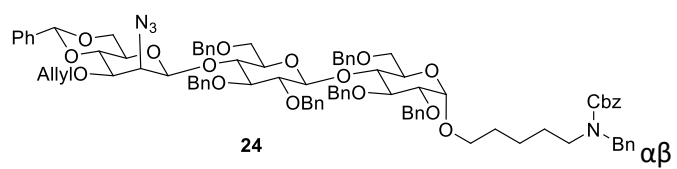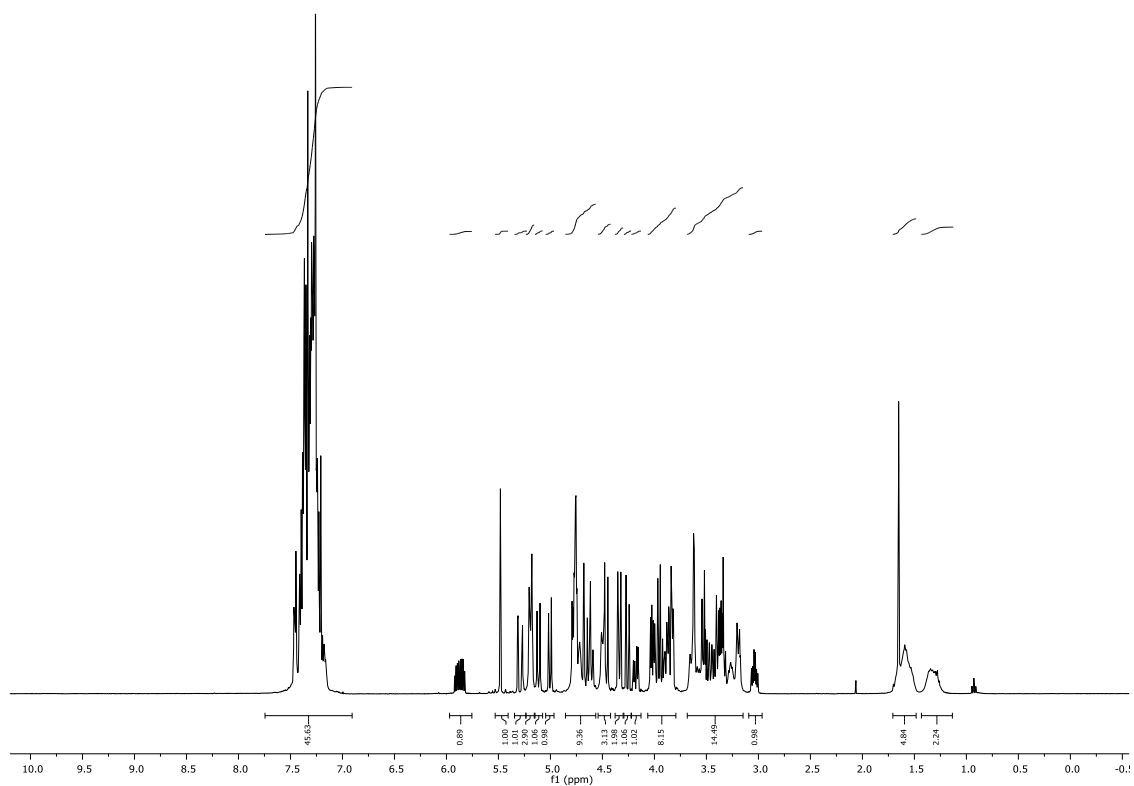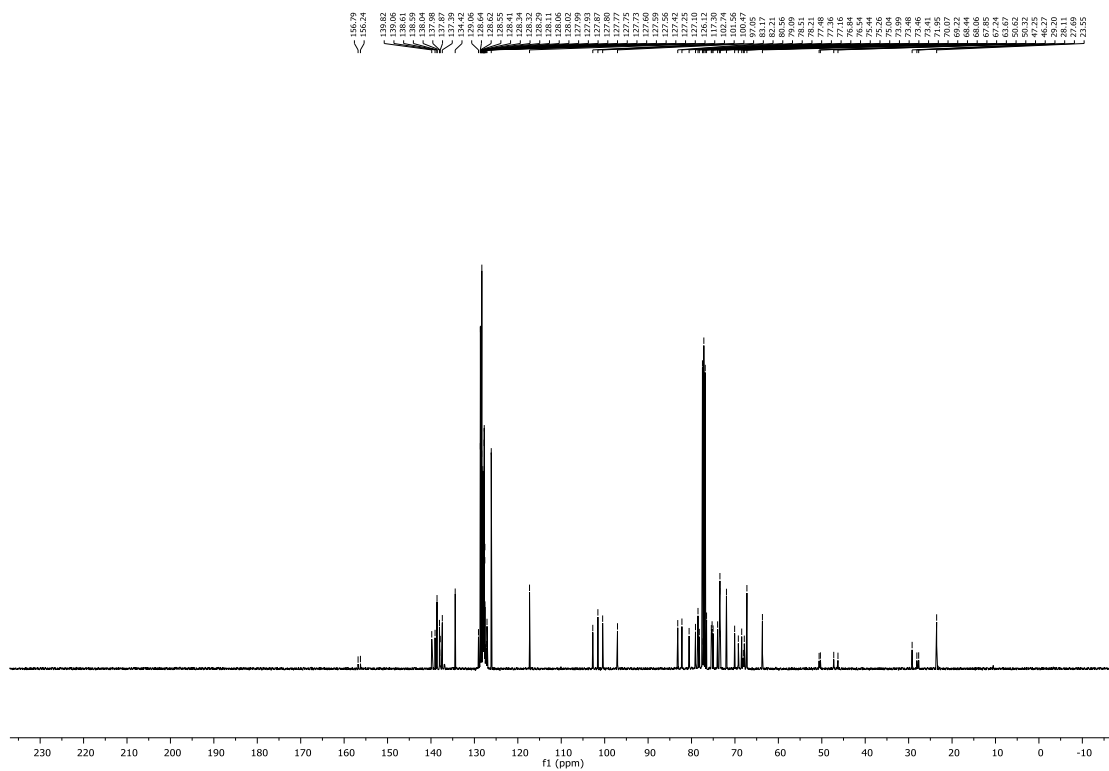

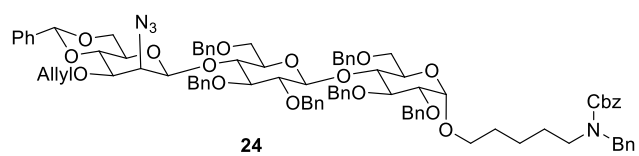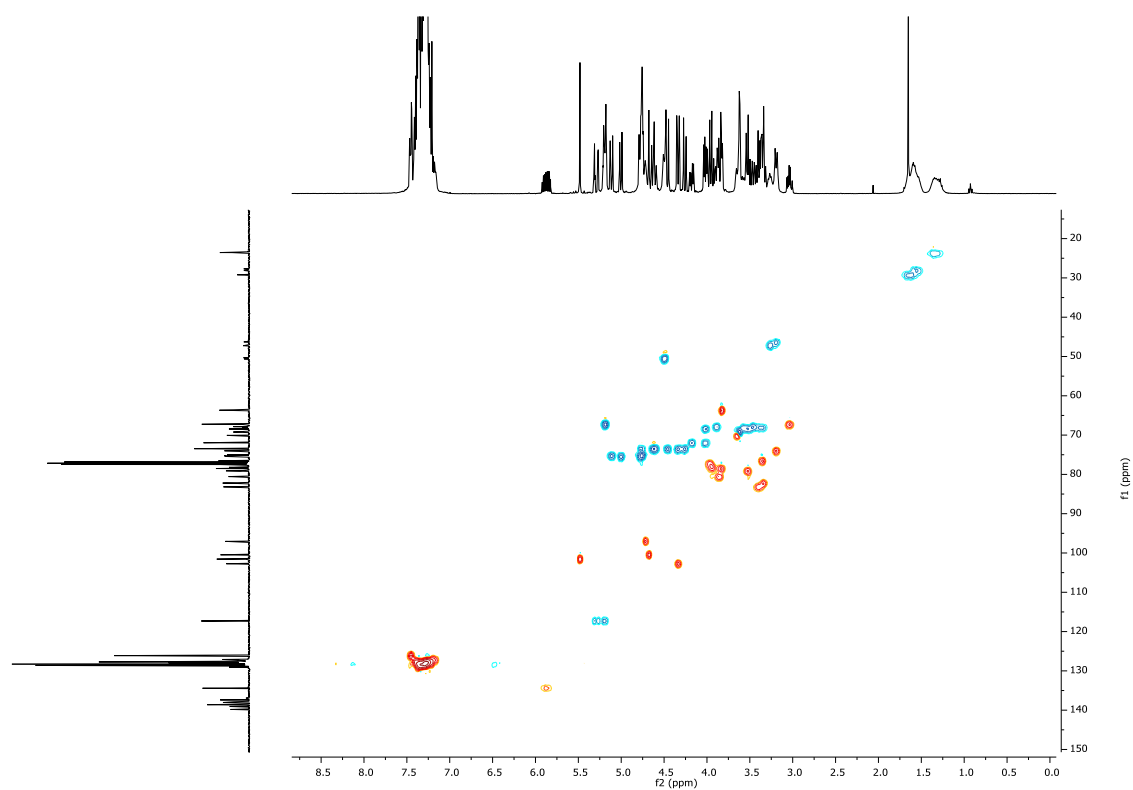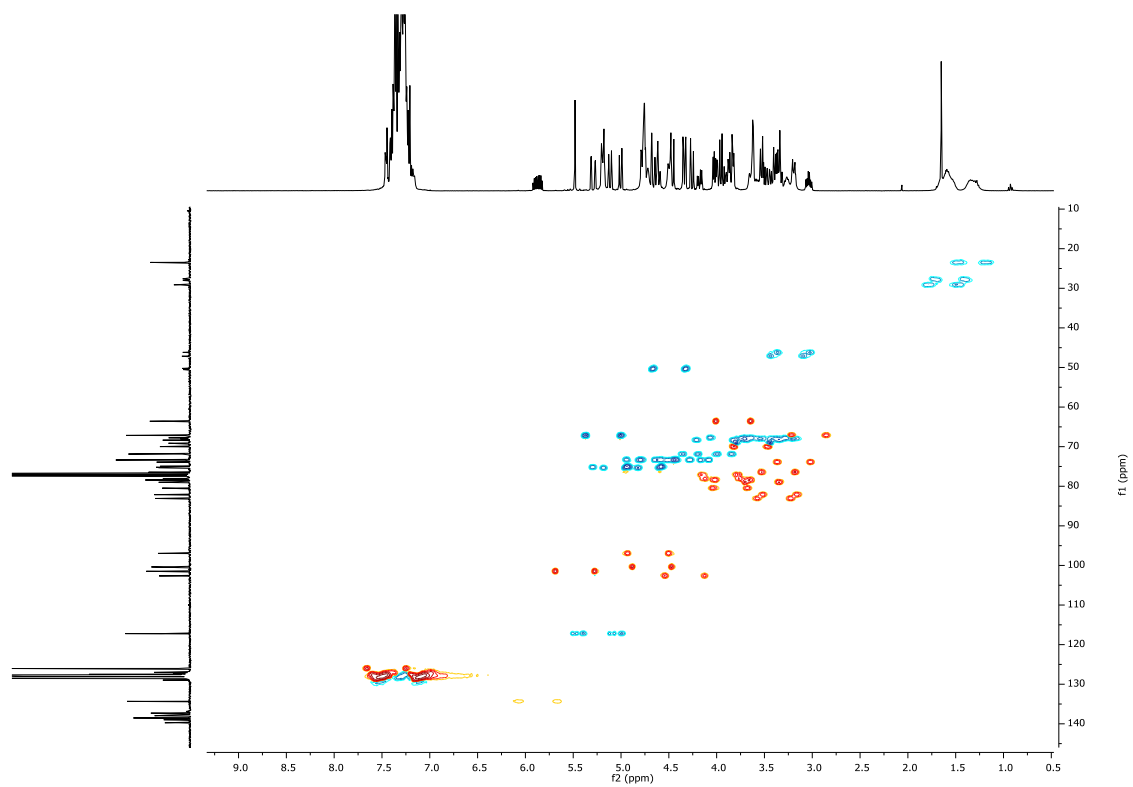



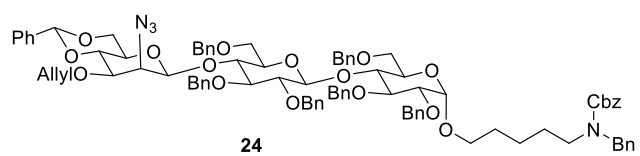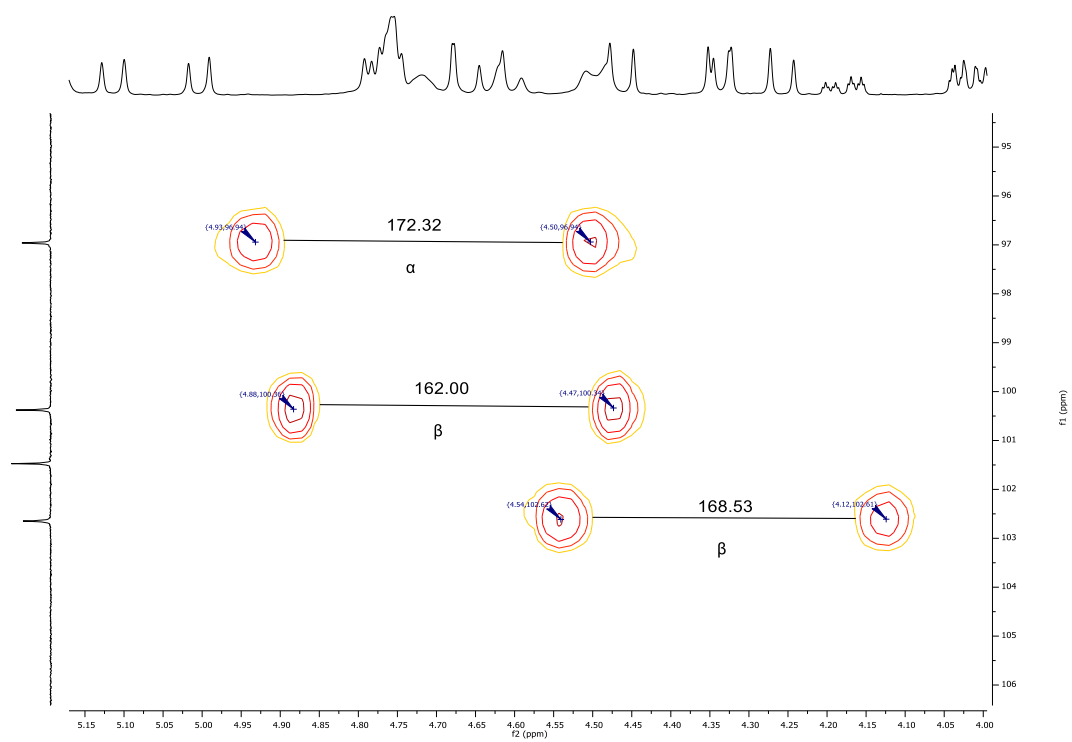

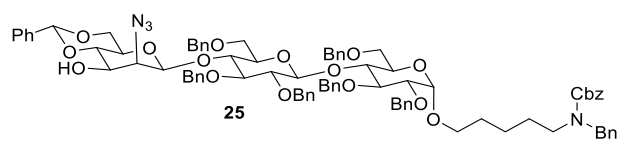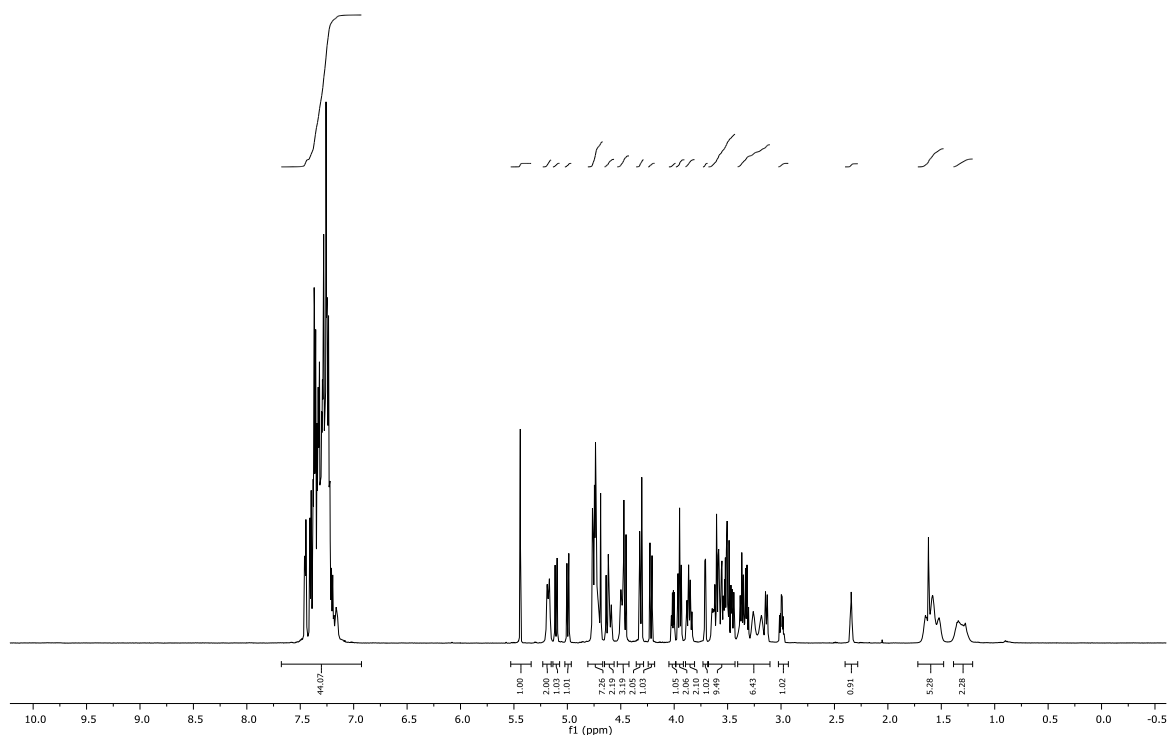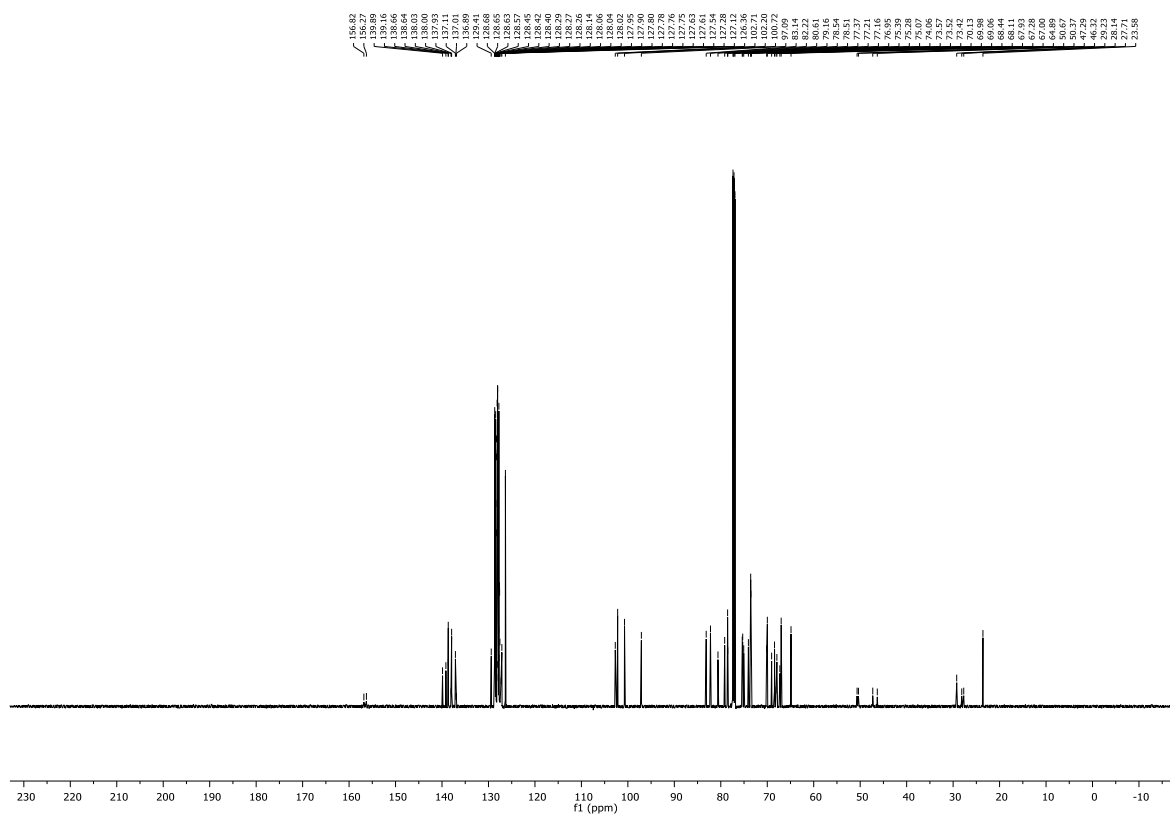

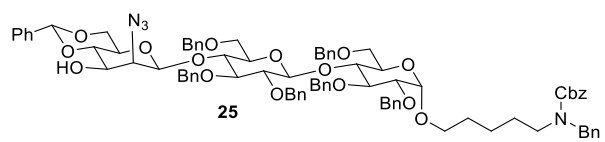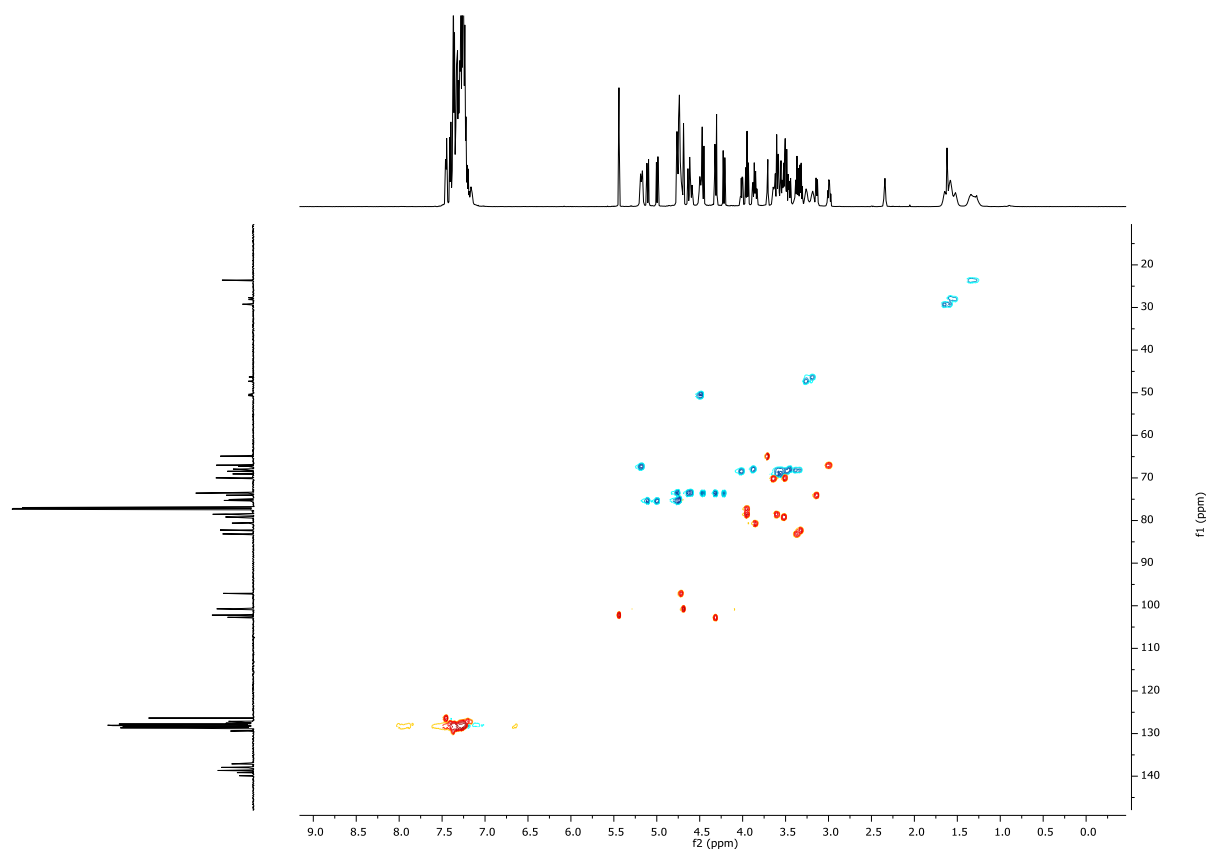

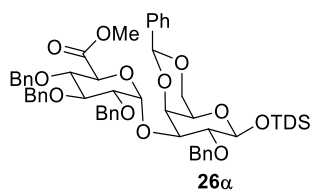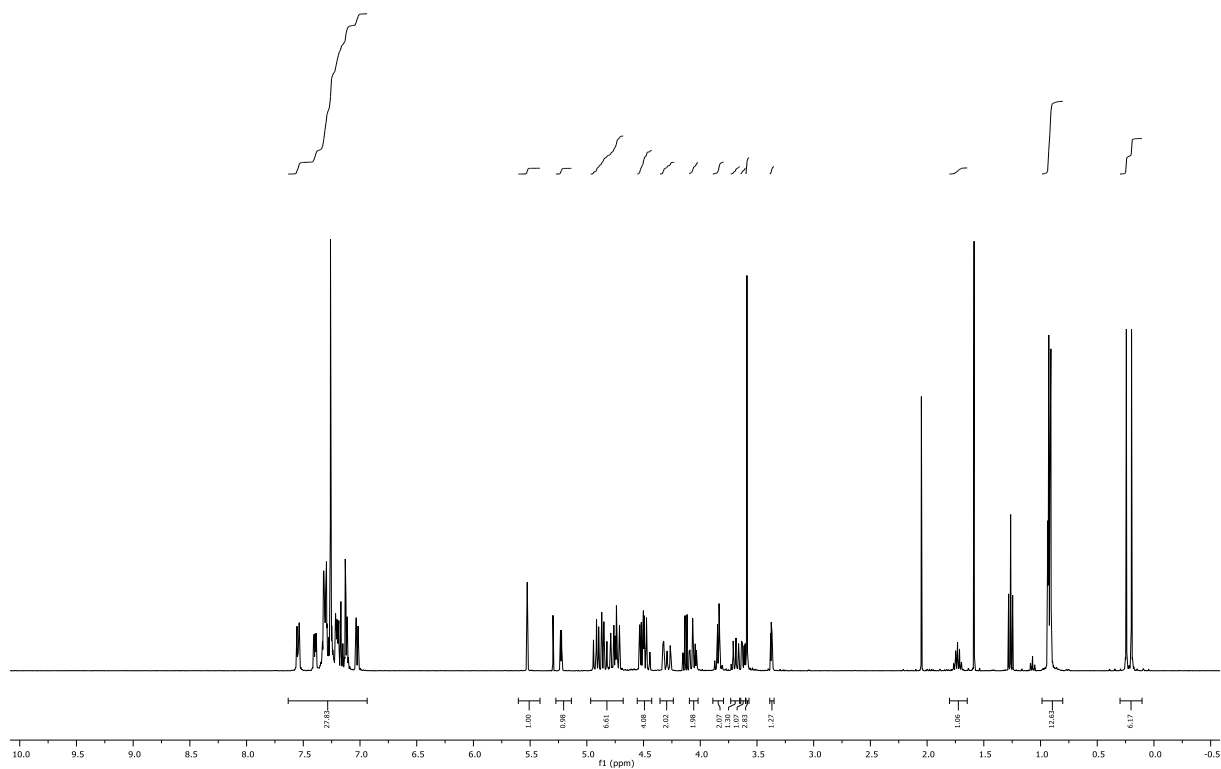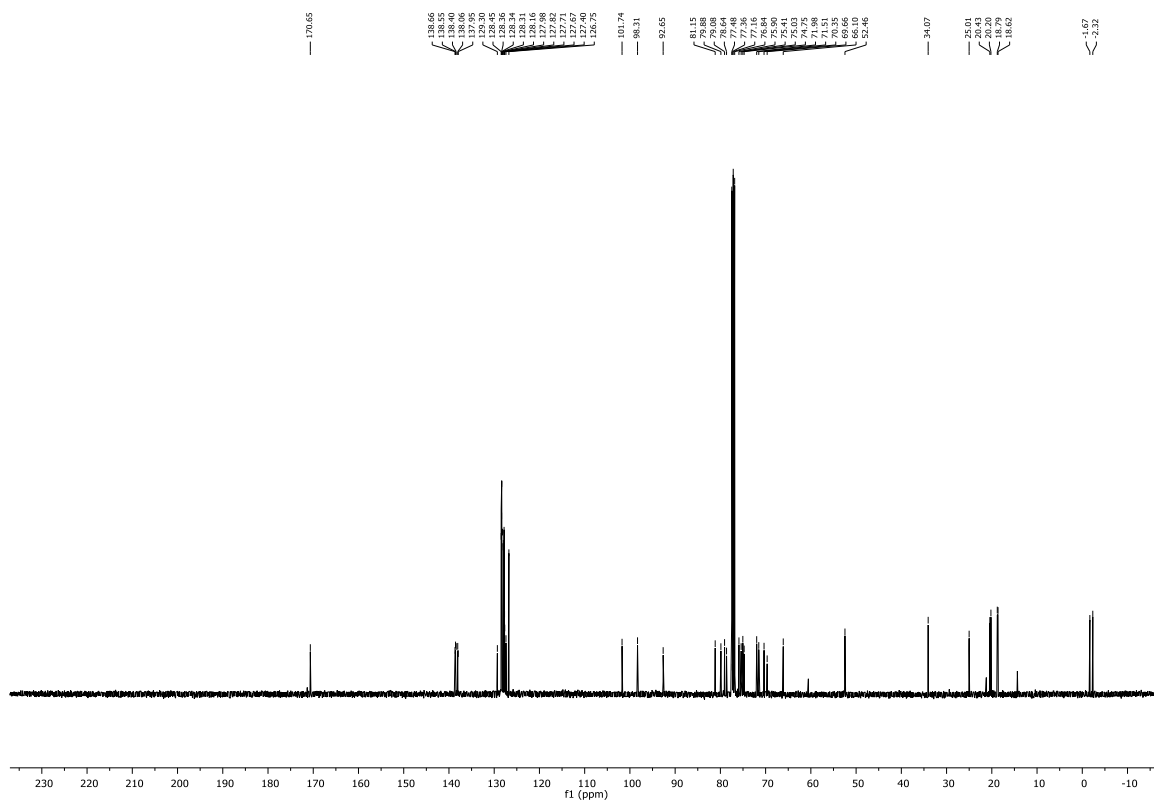

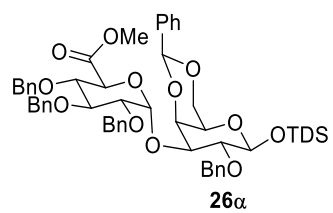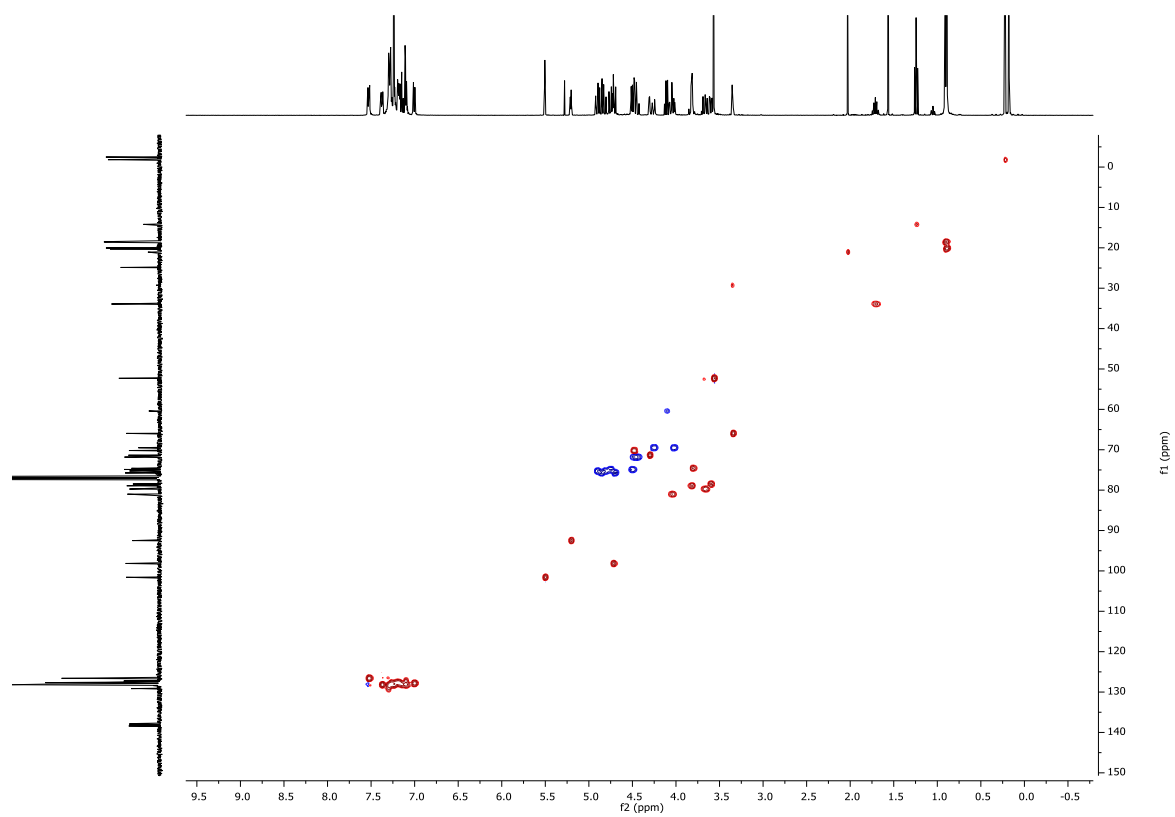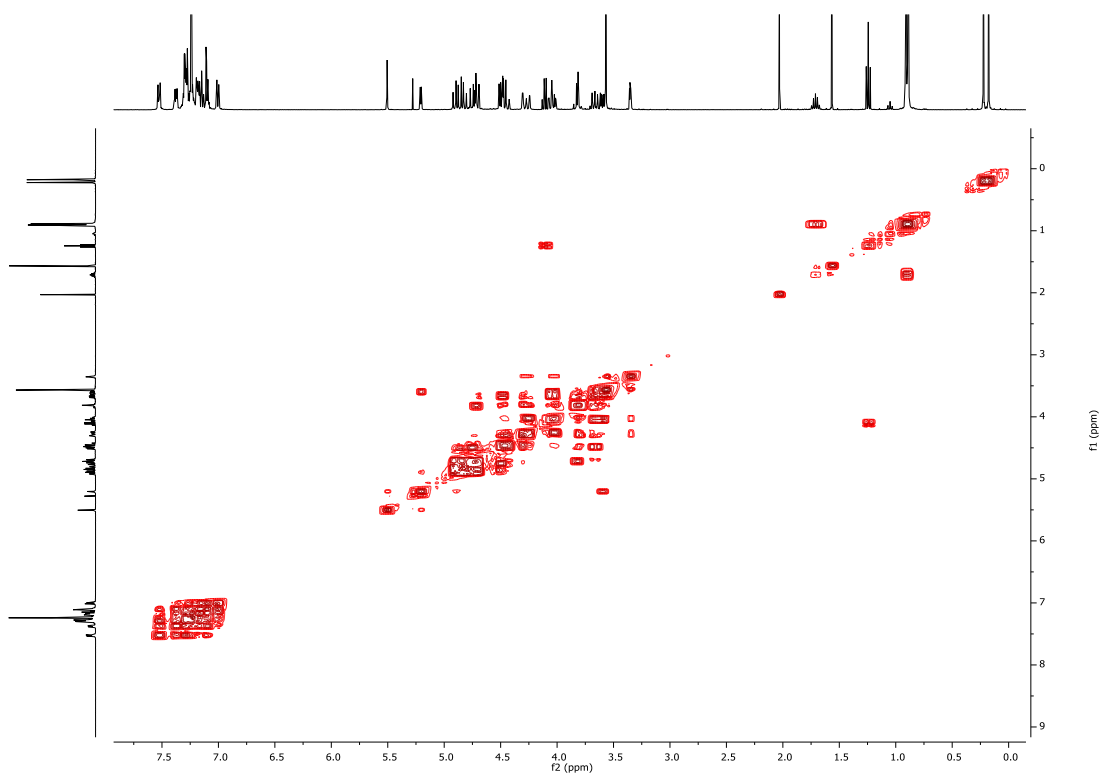

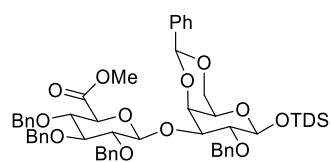

26 $\beta$

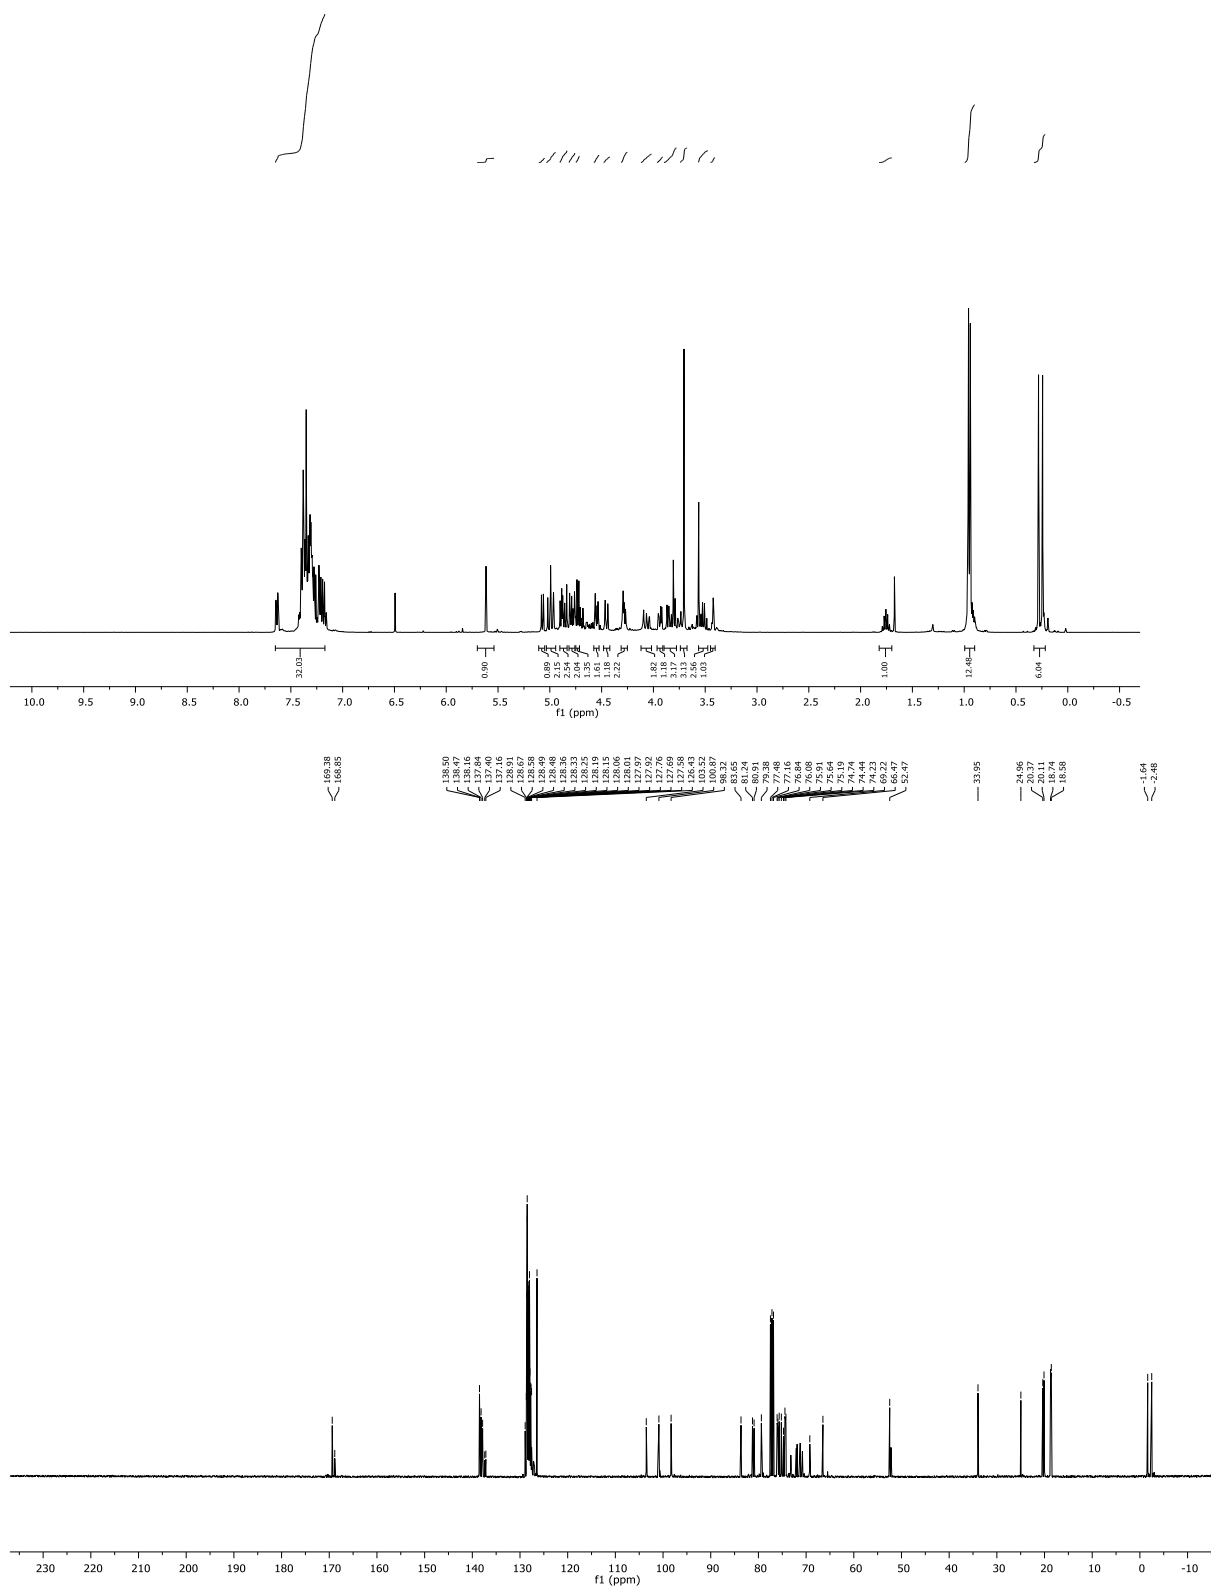

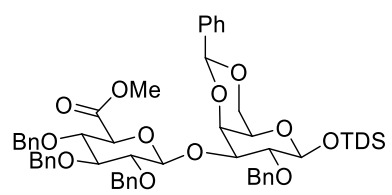

26 $\beta$

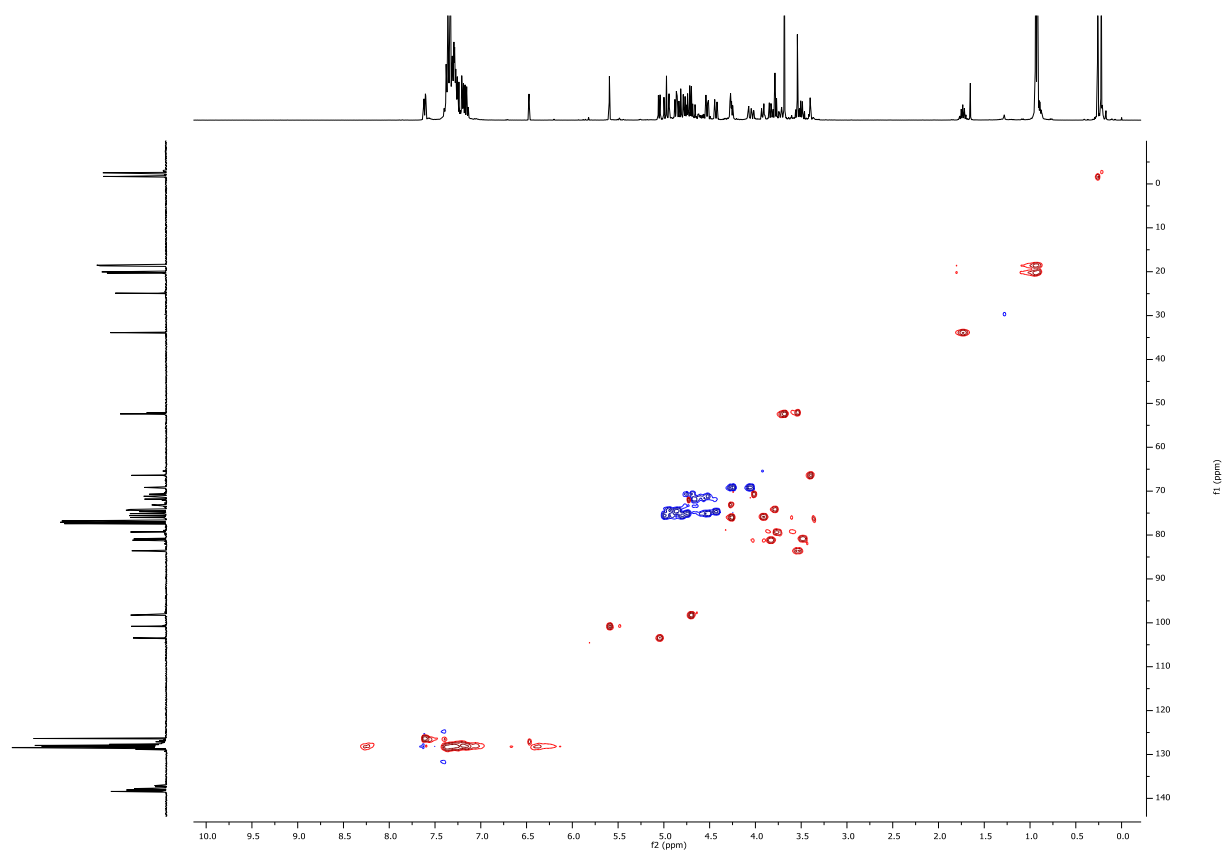

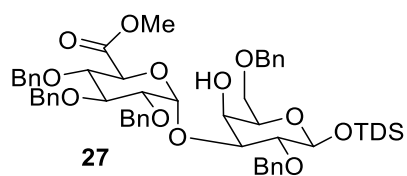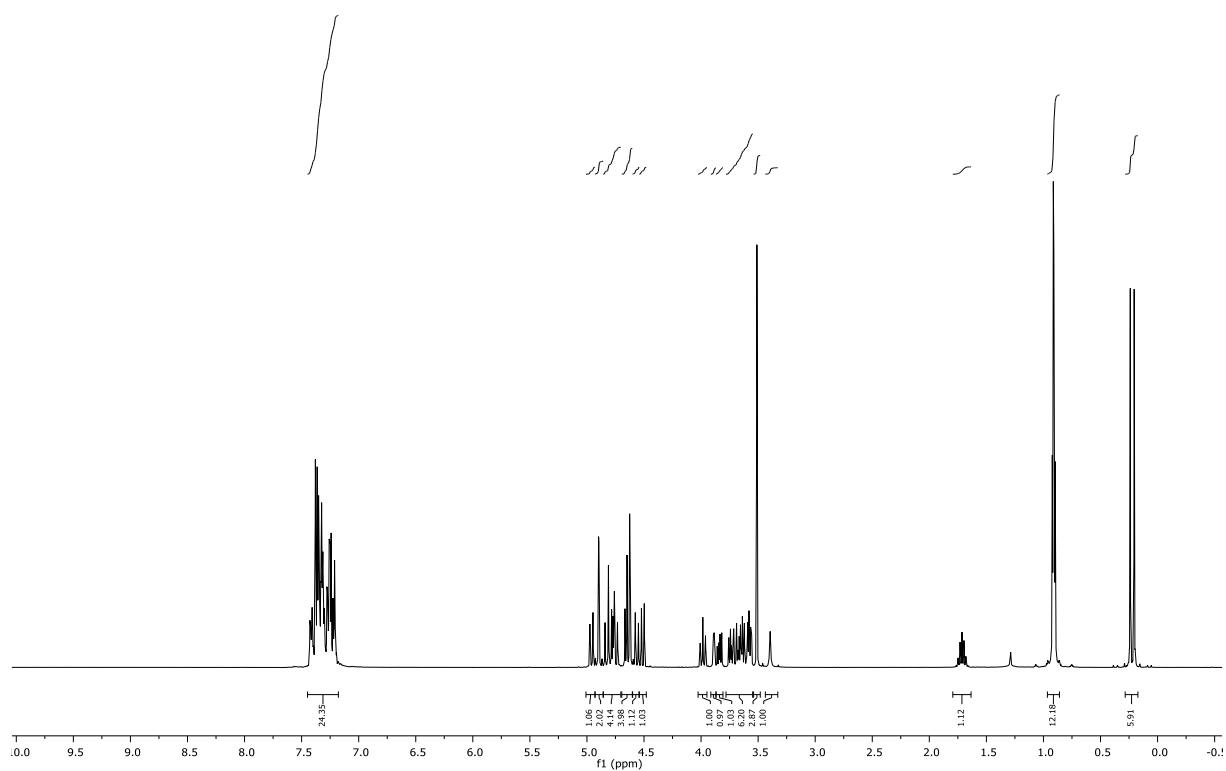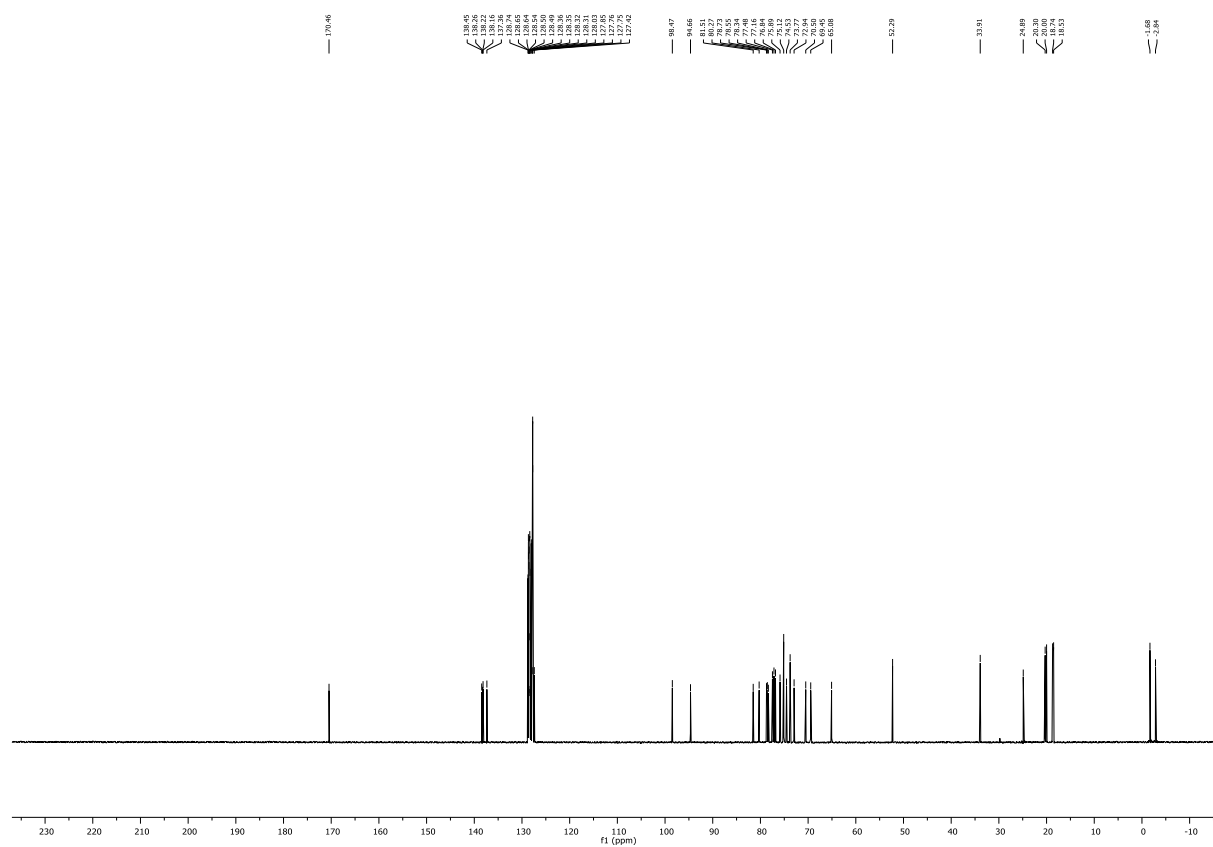



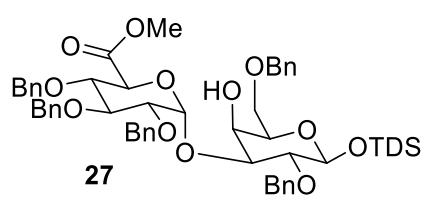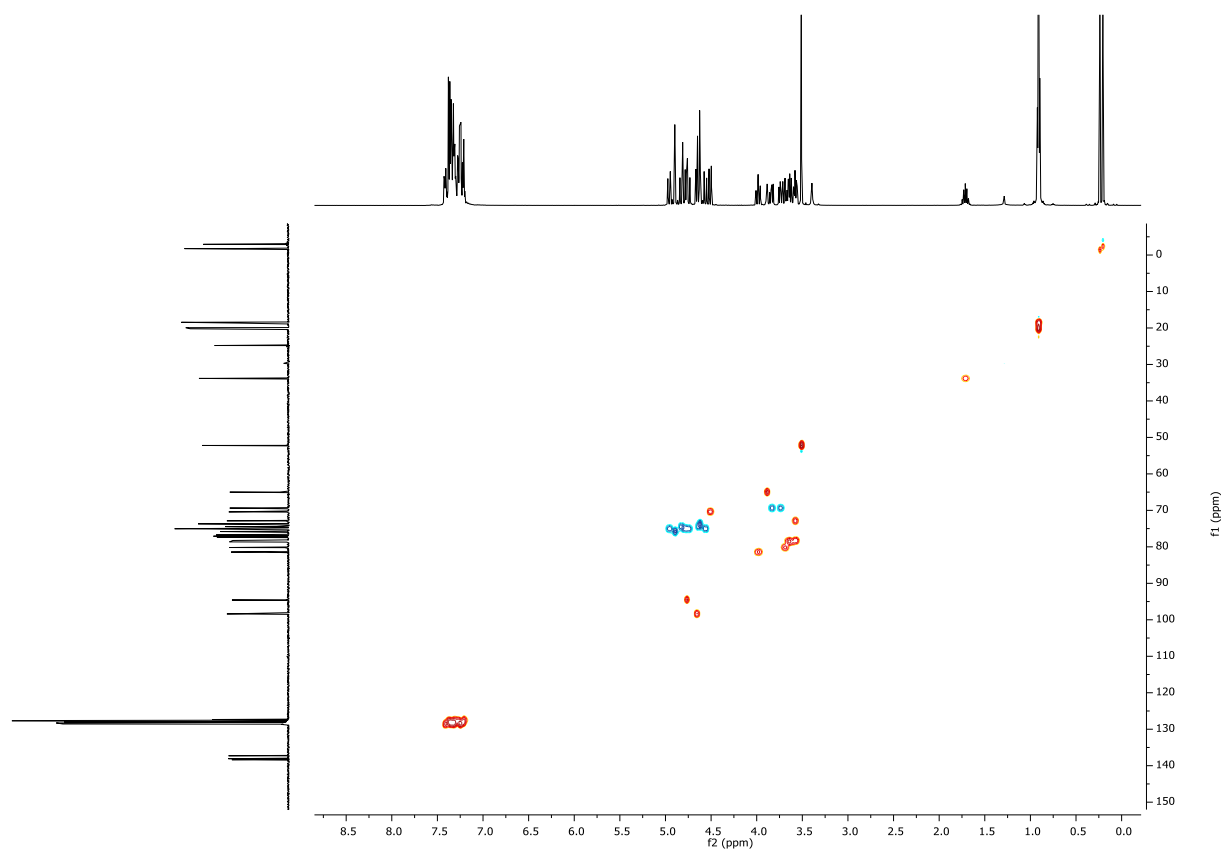

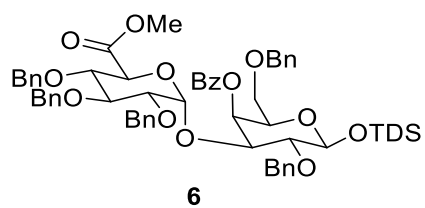

6

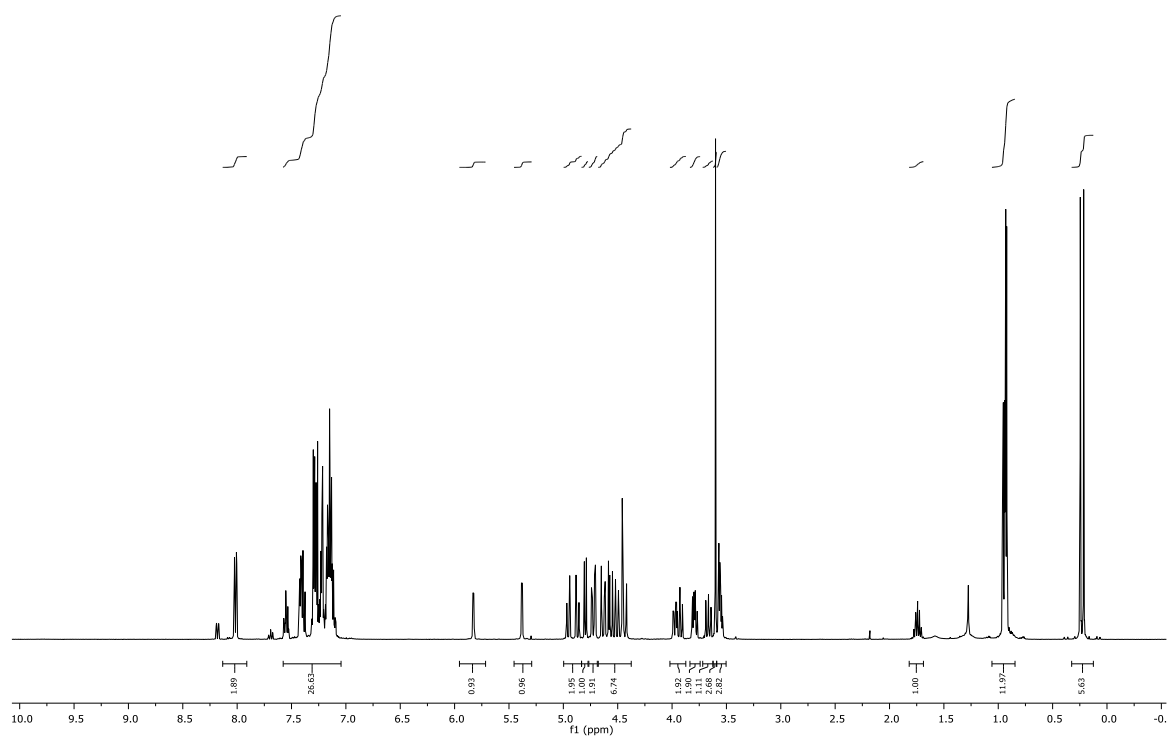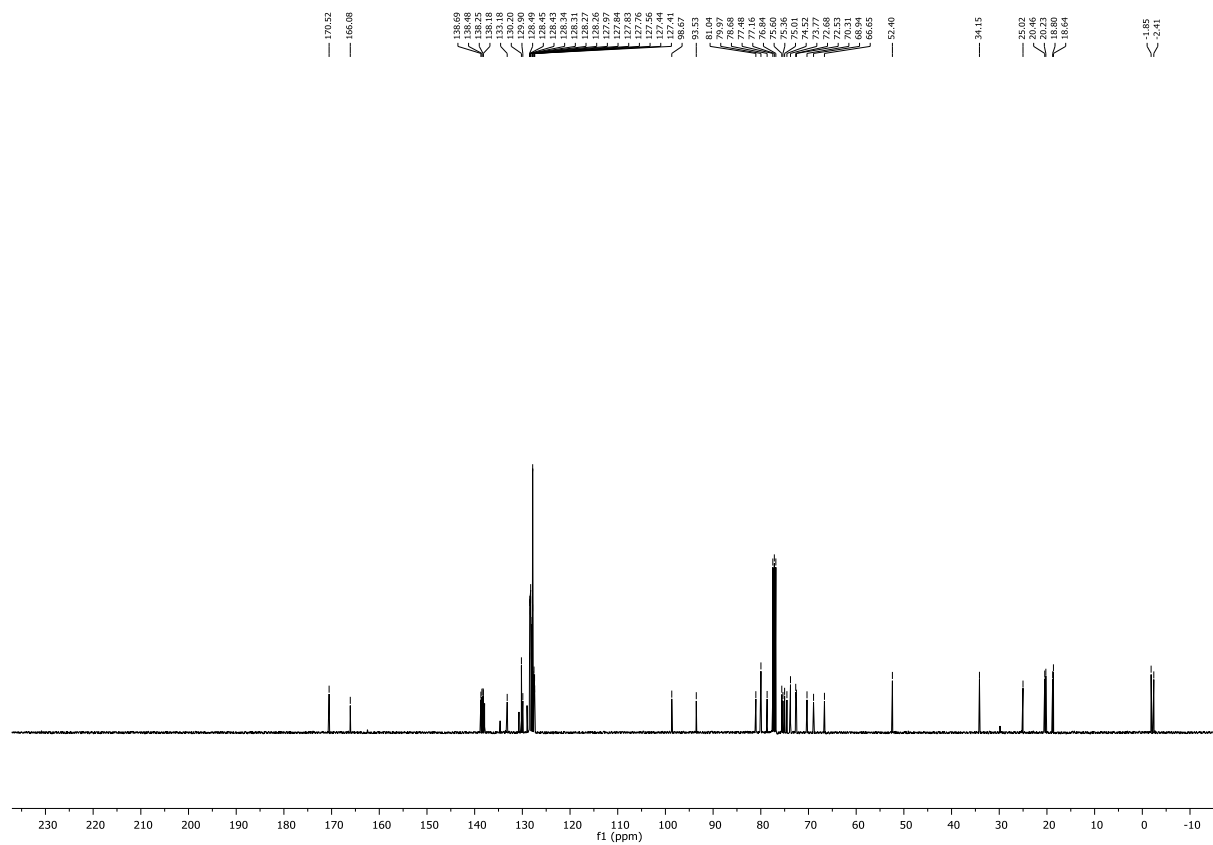

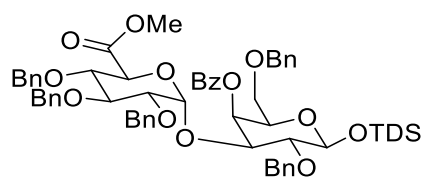

6

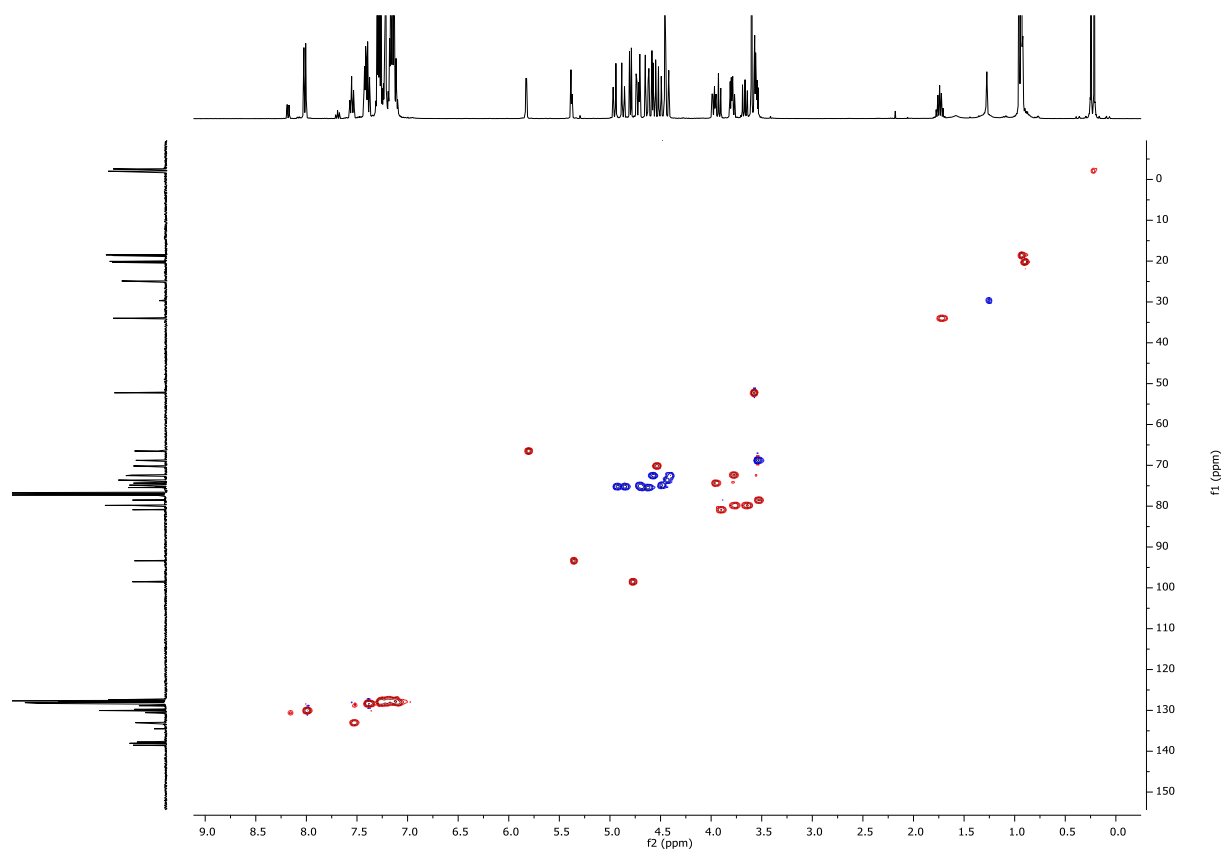

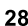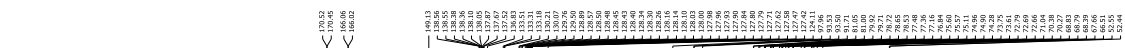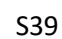

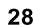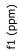

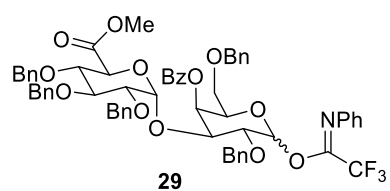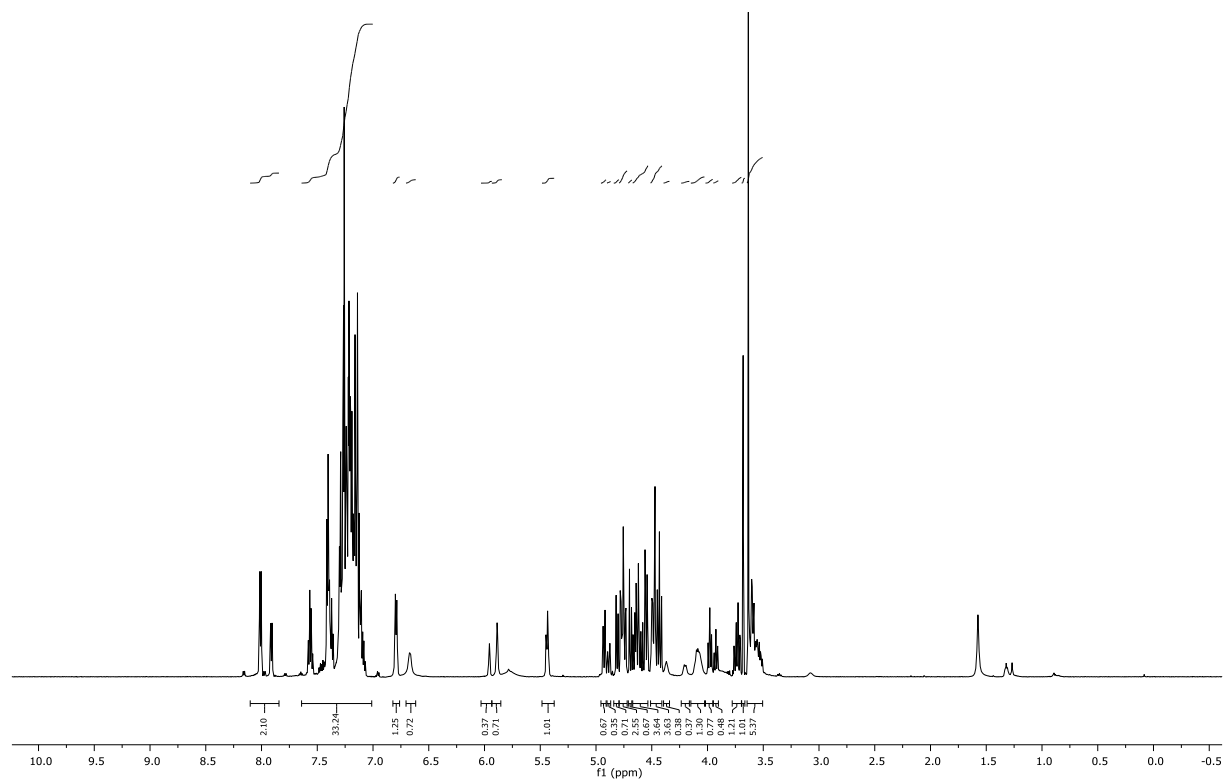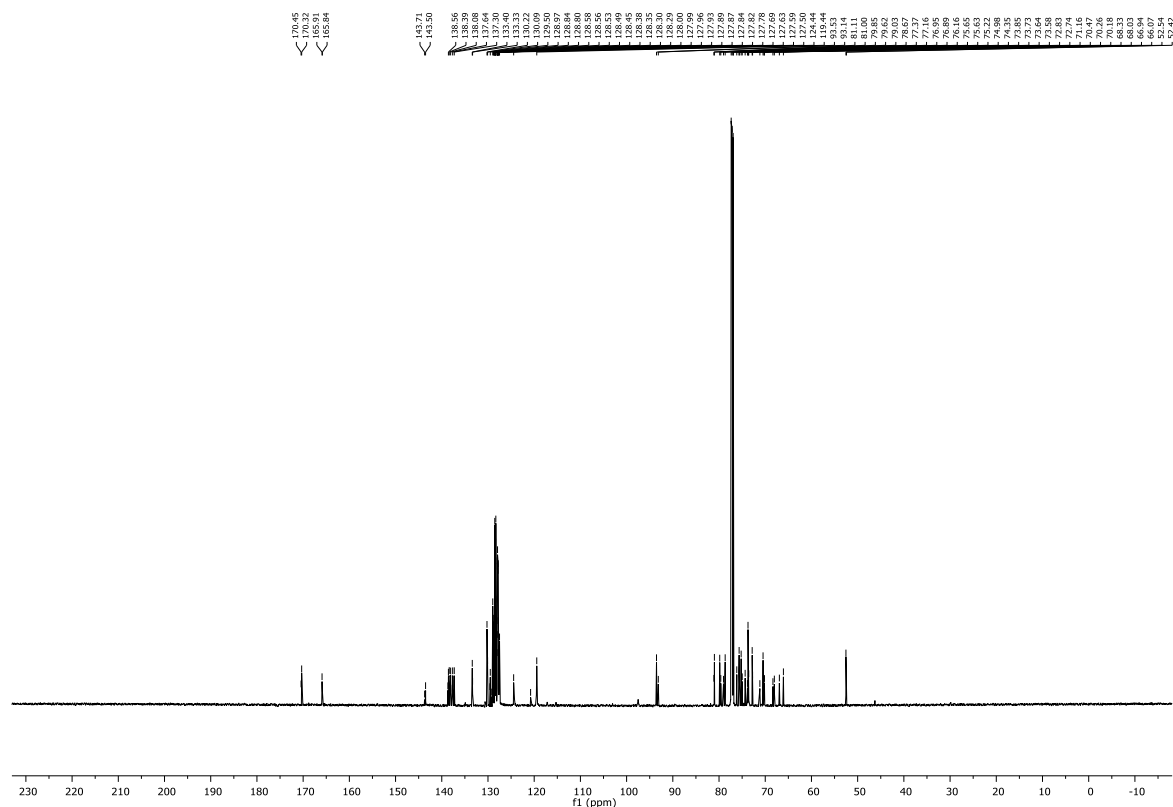

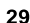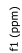

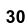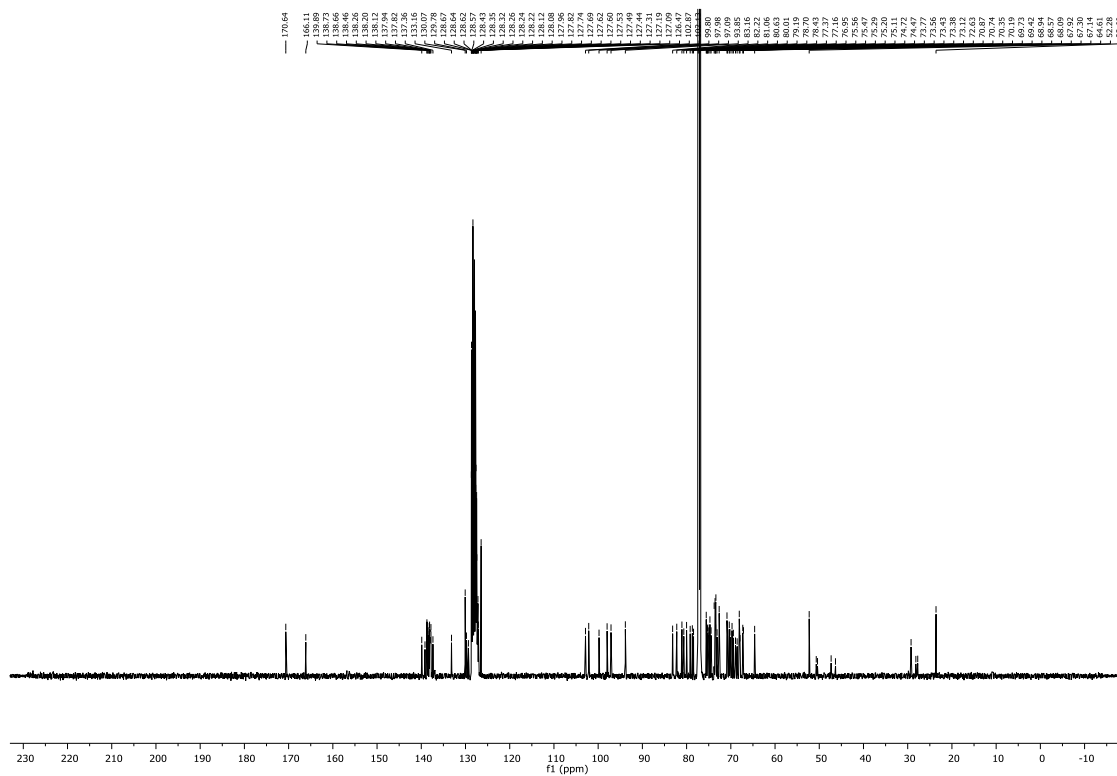



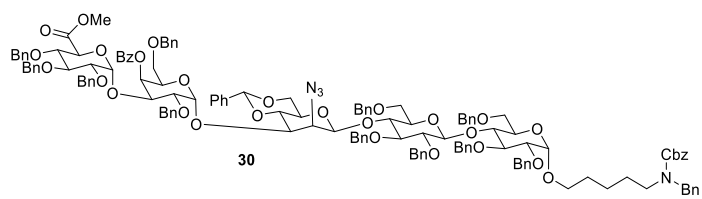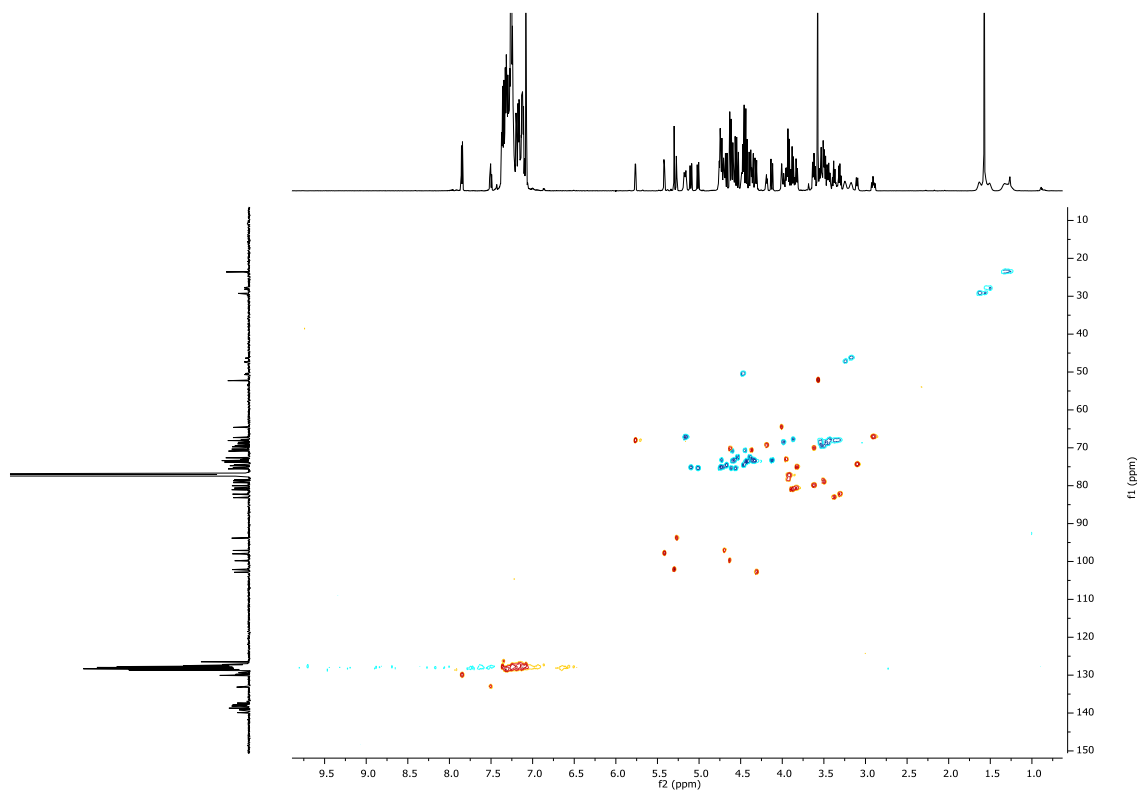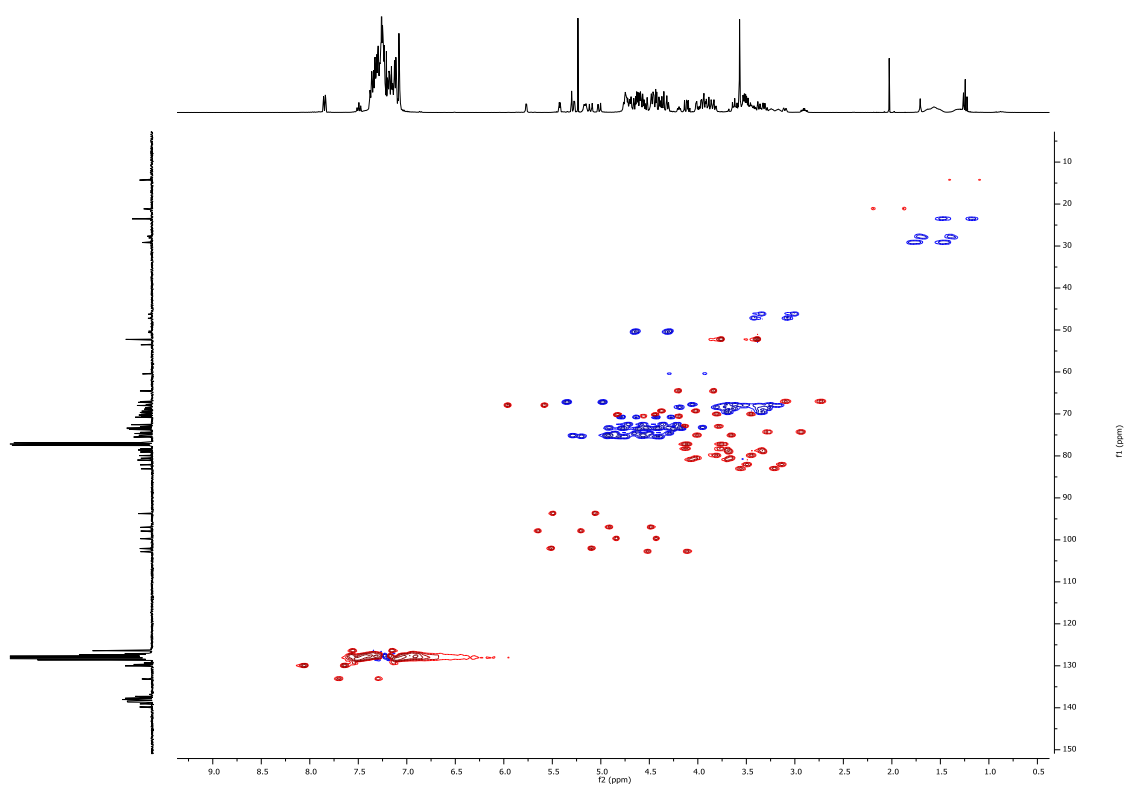

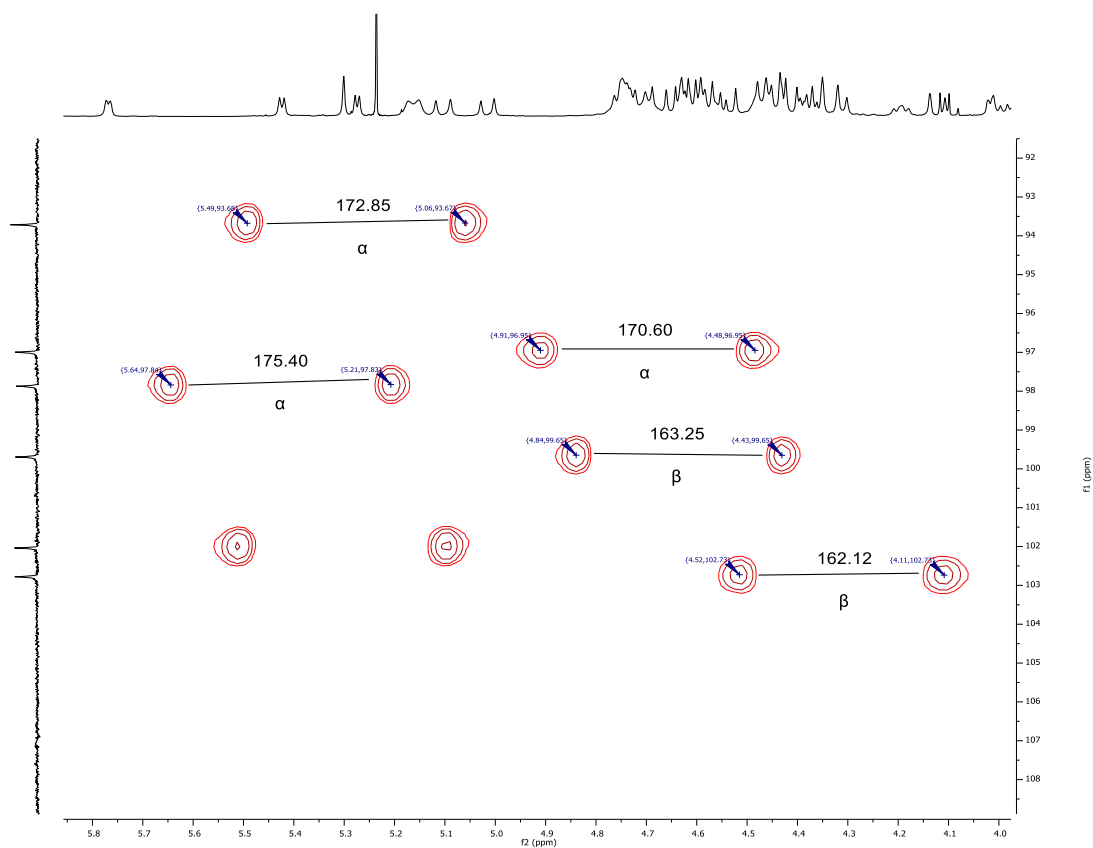

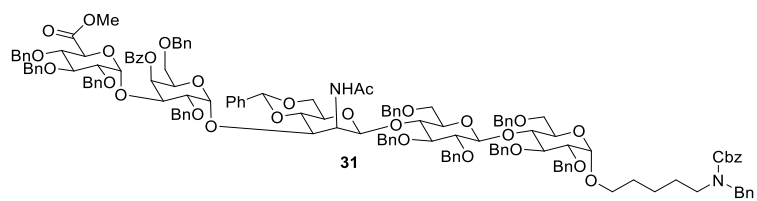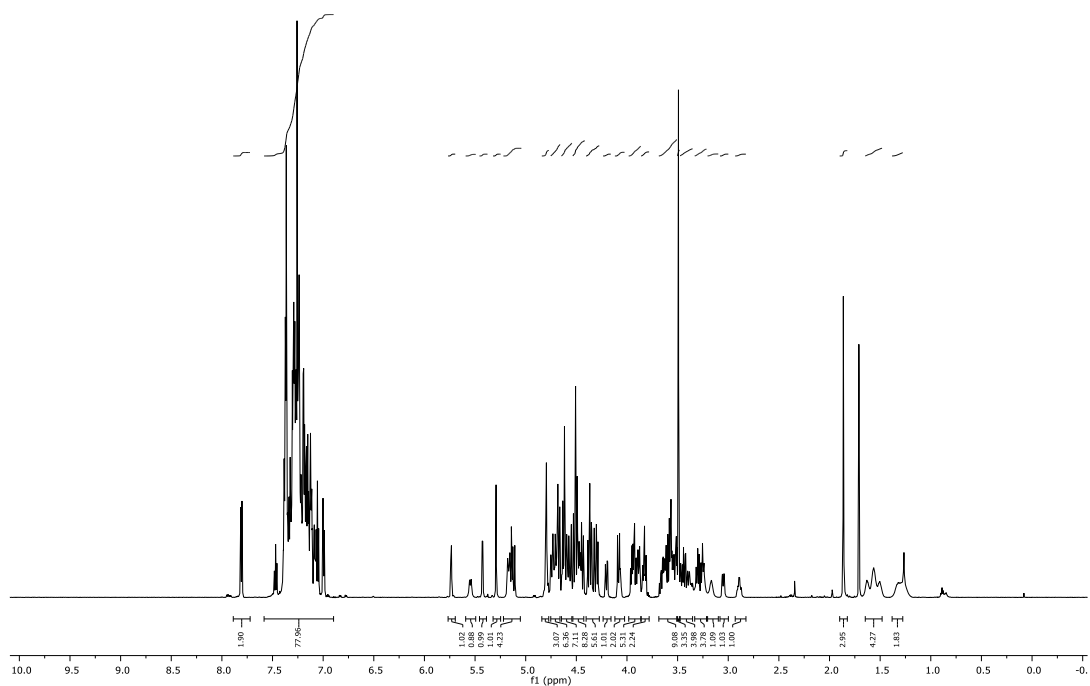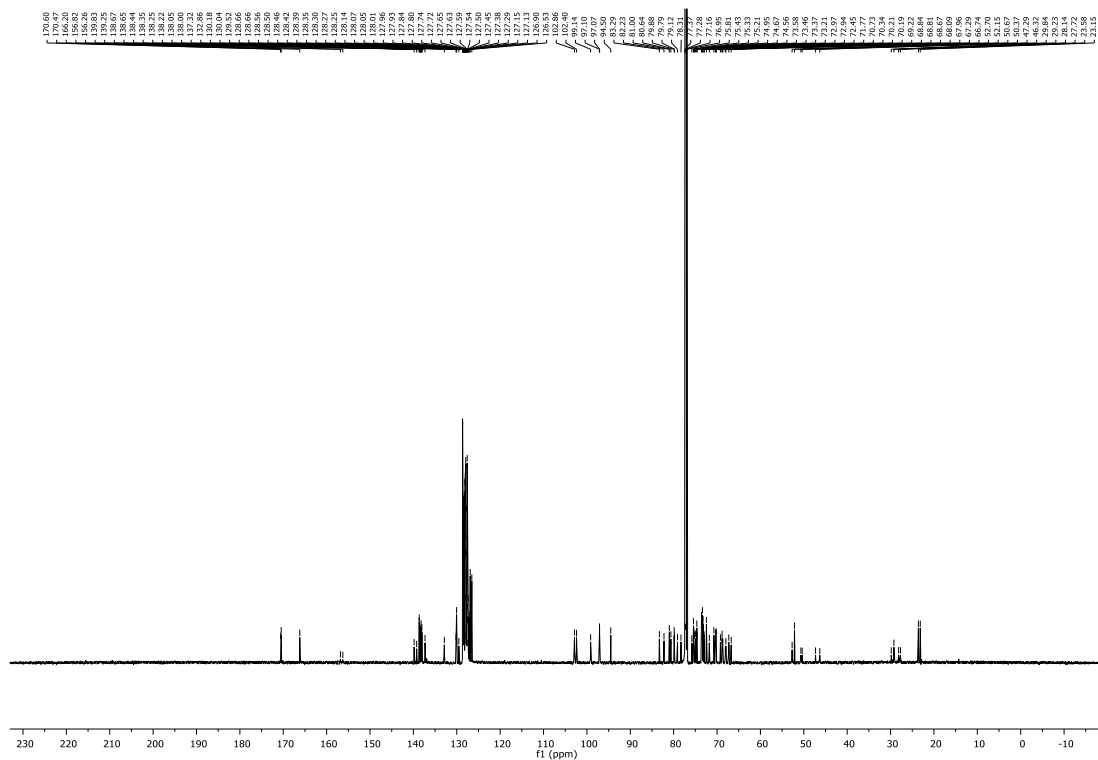

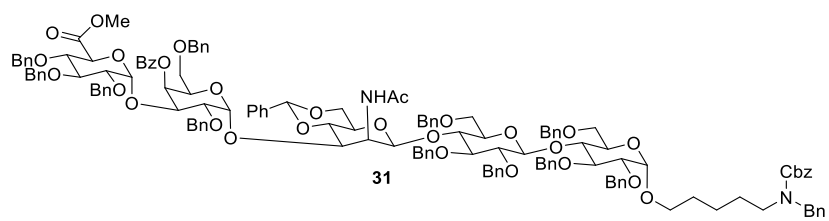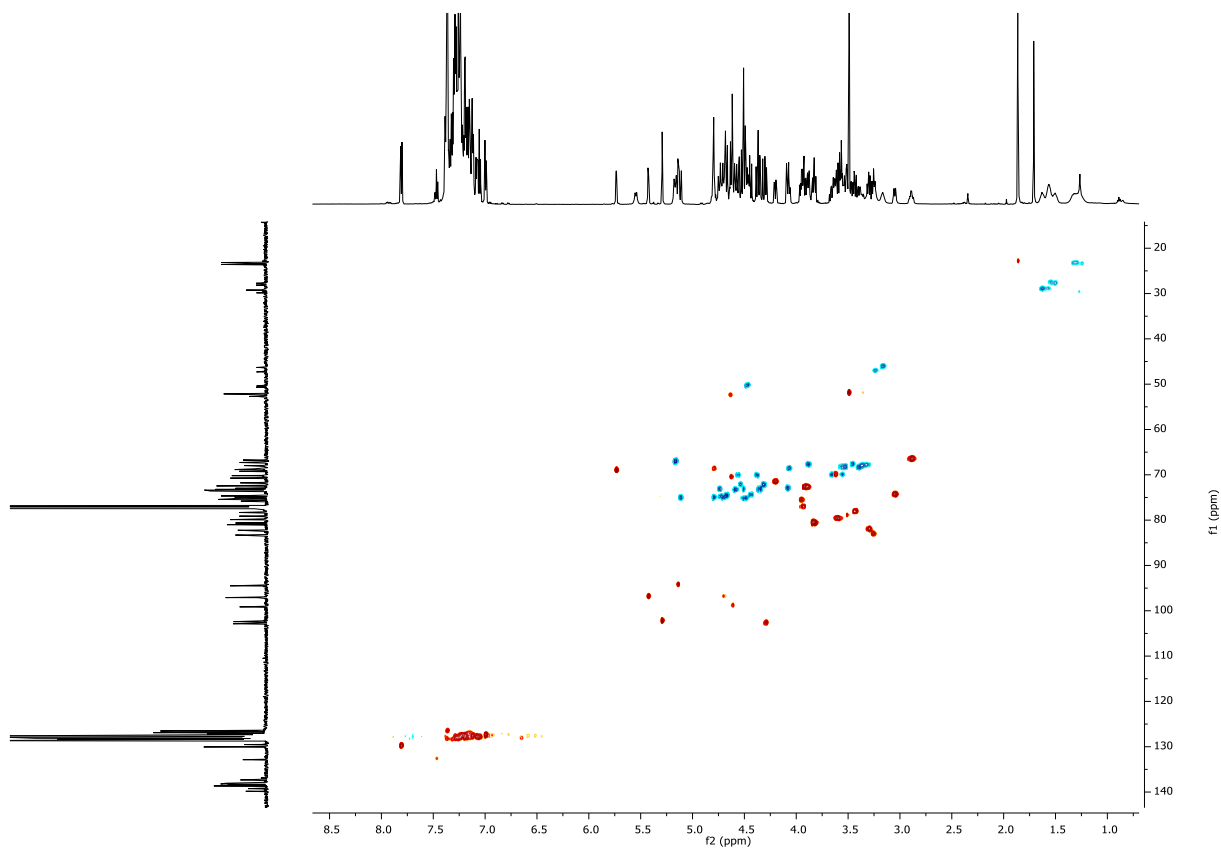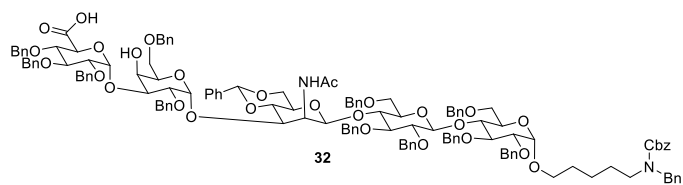

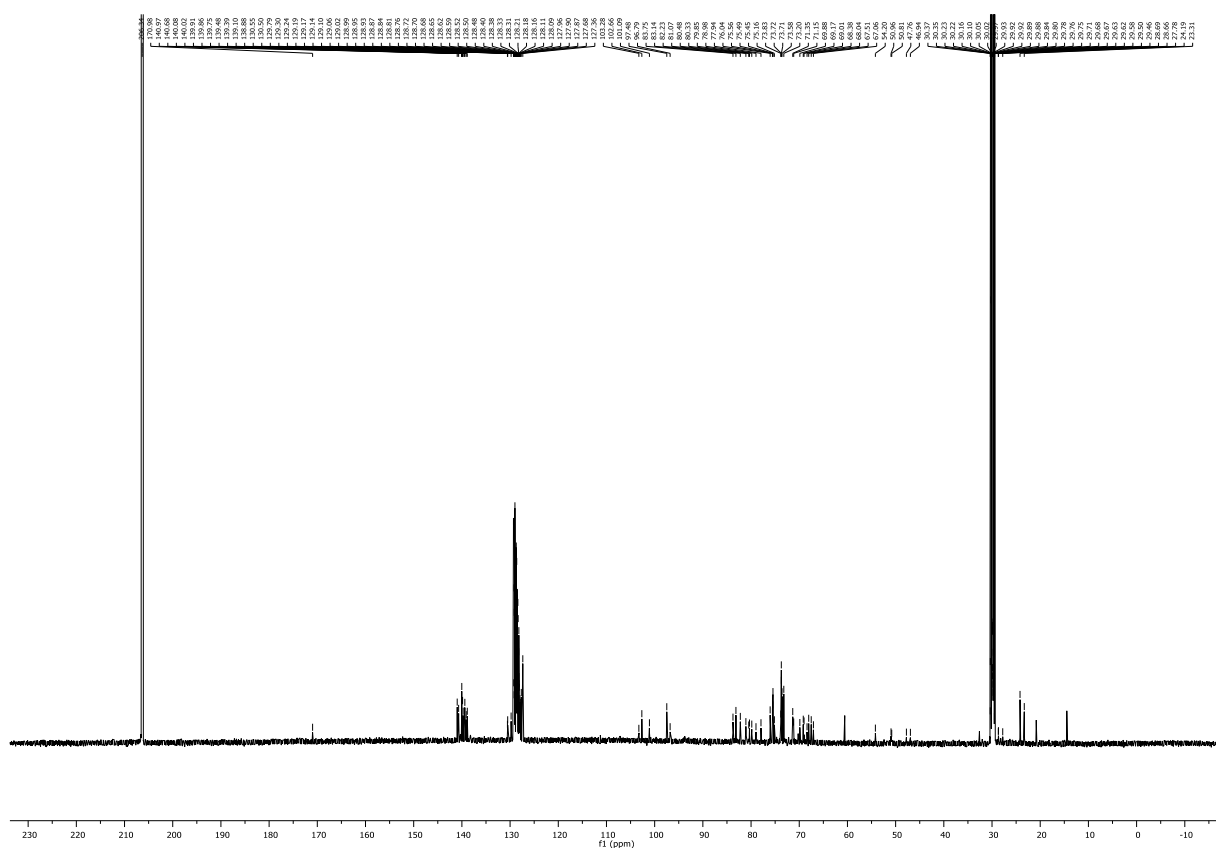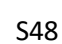

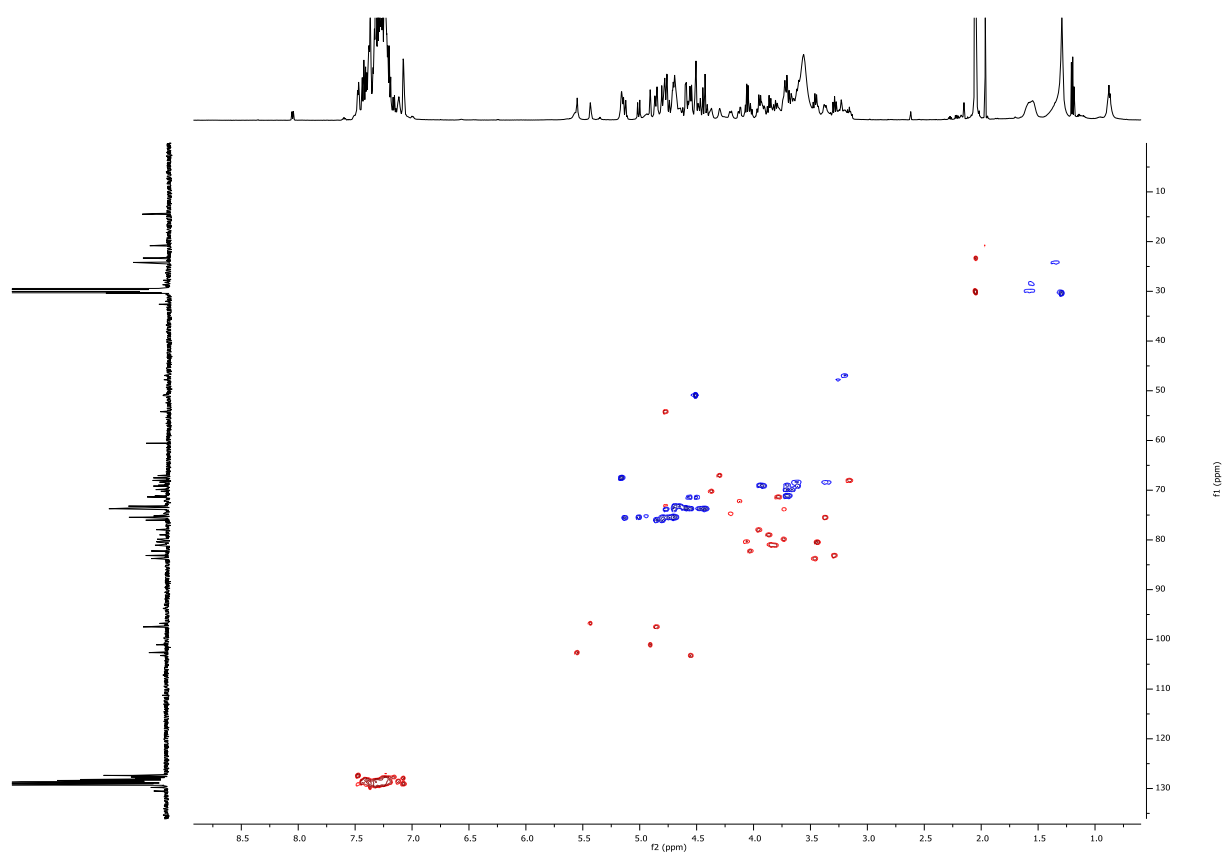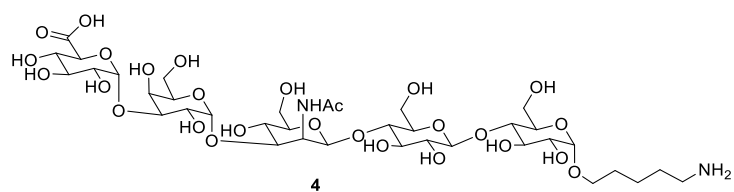

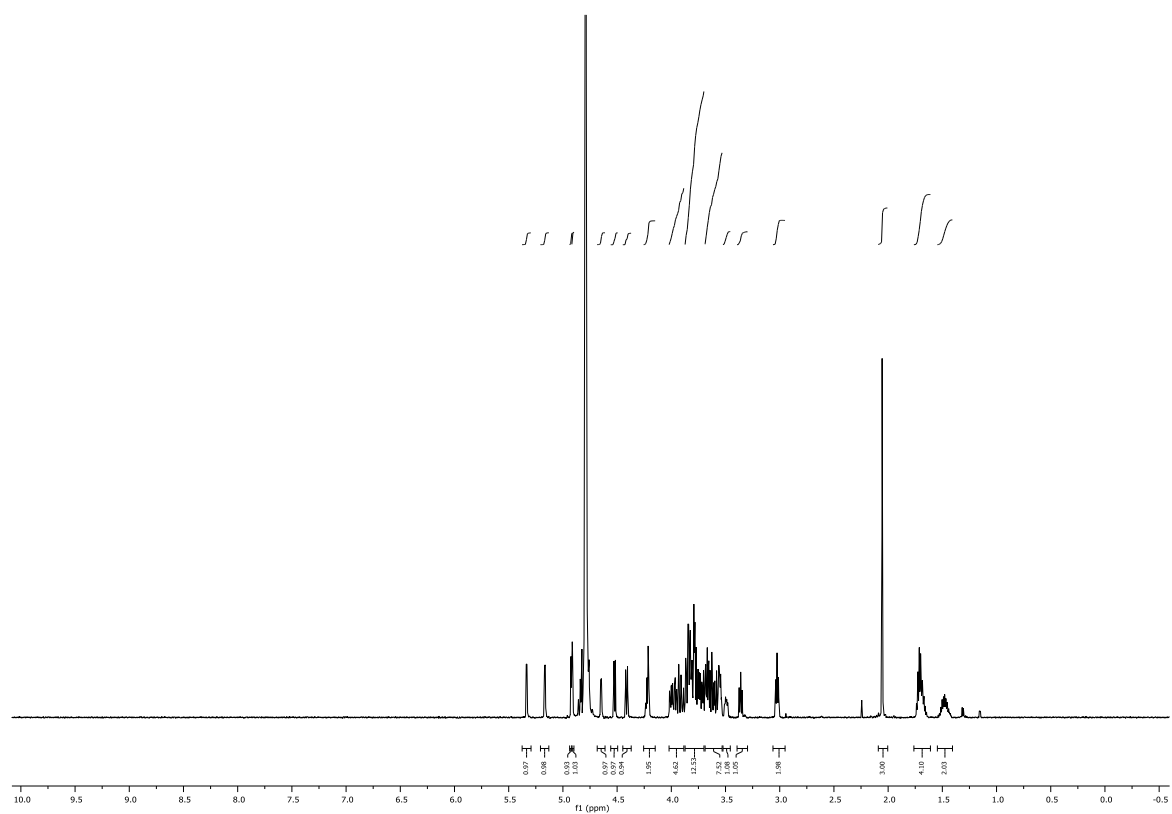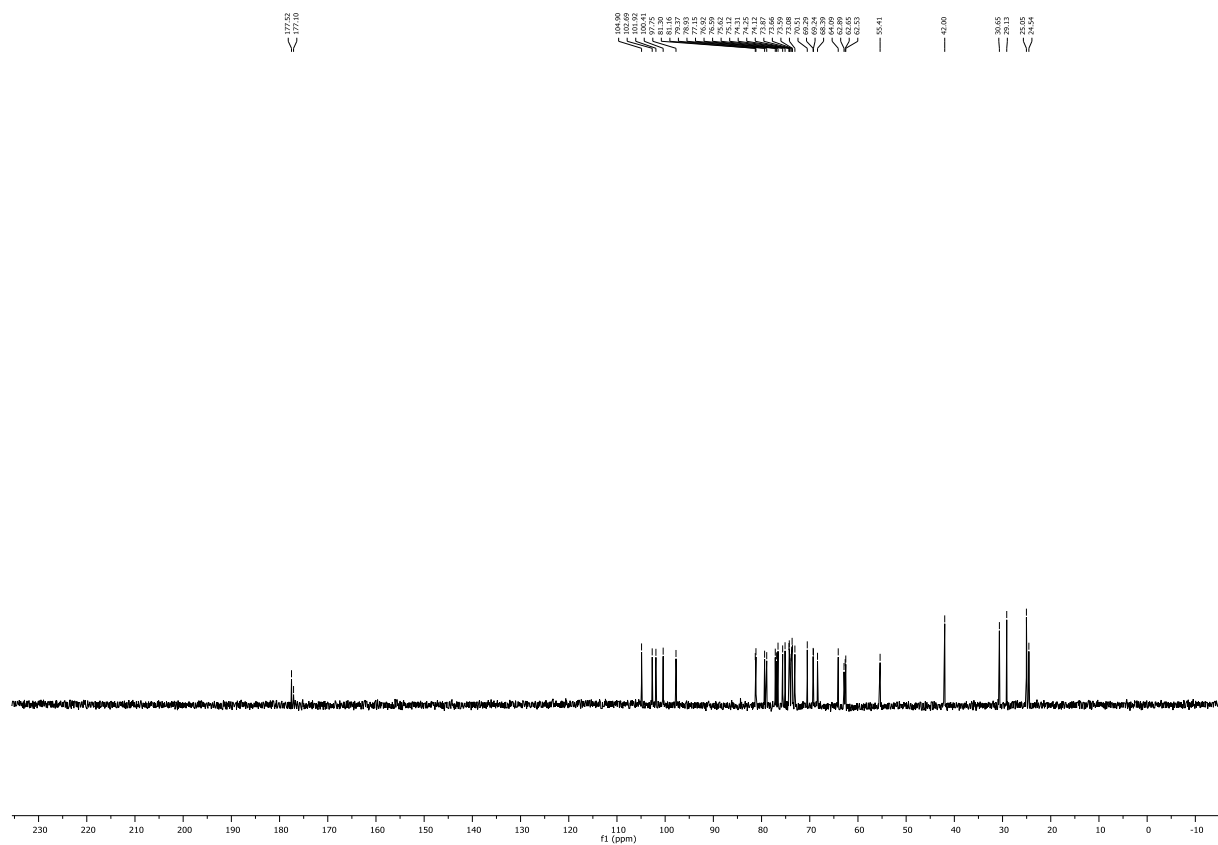

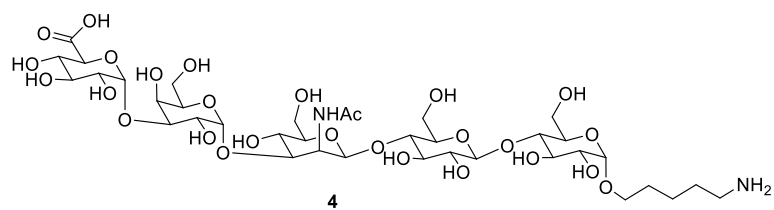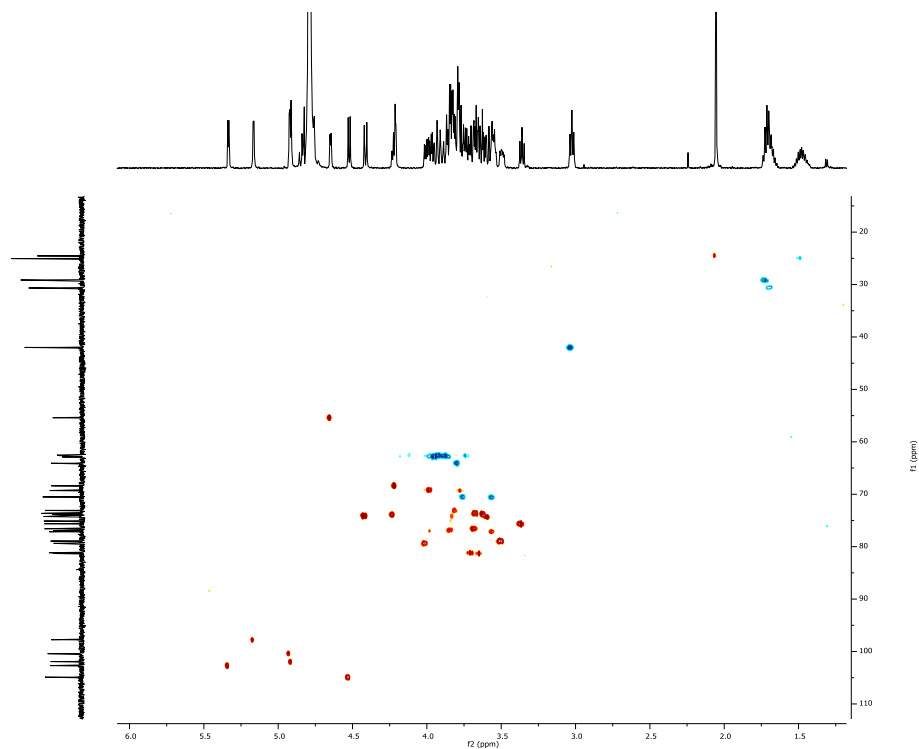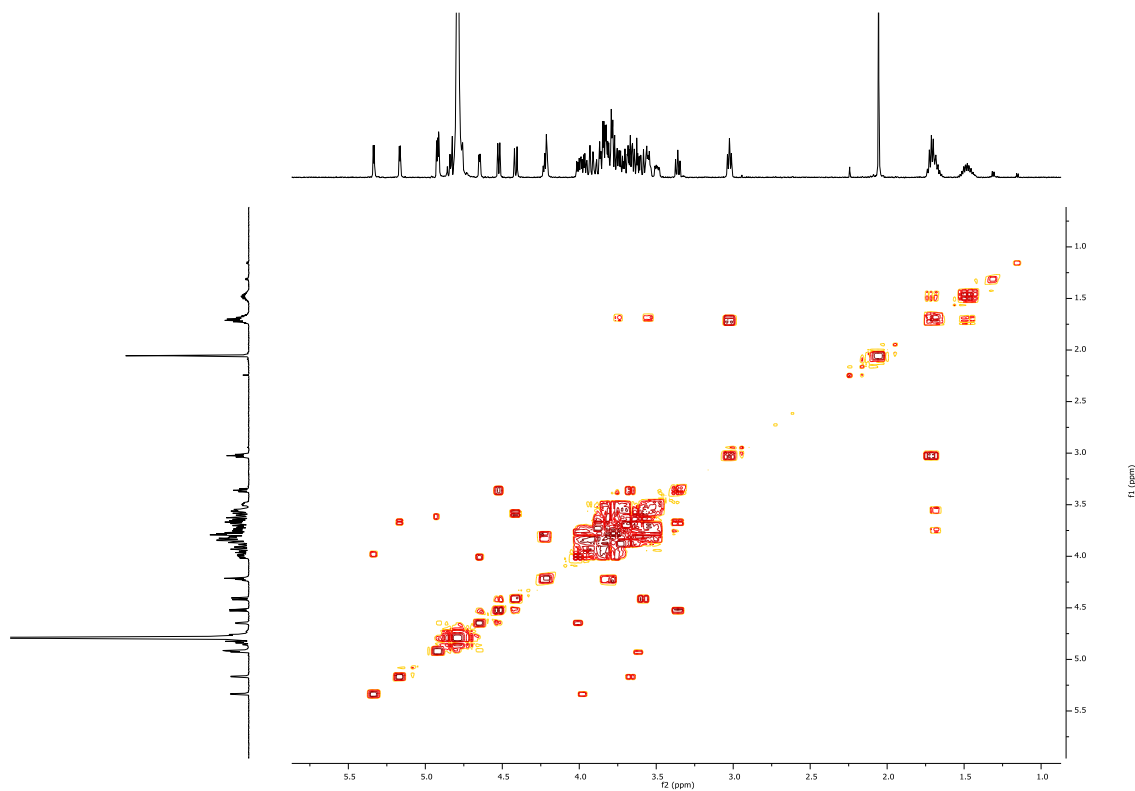



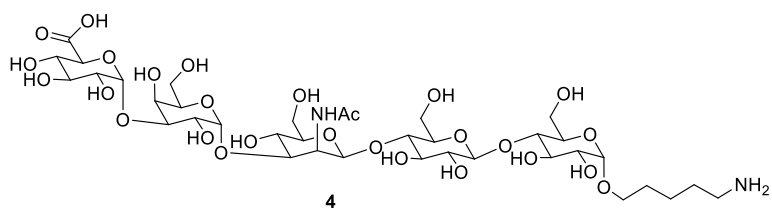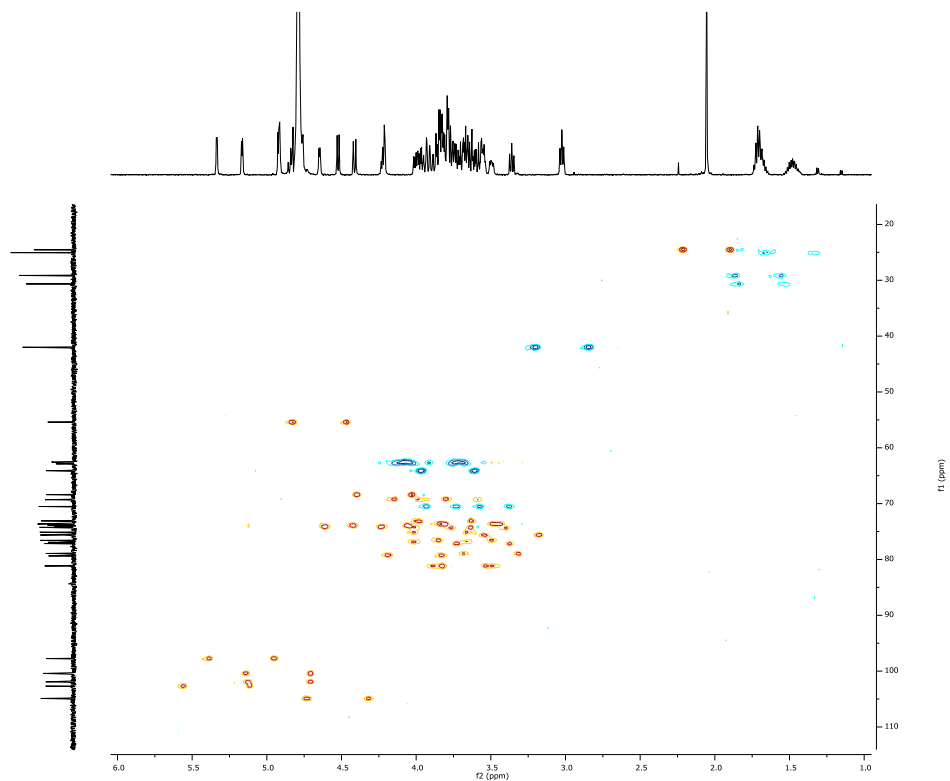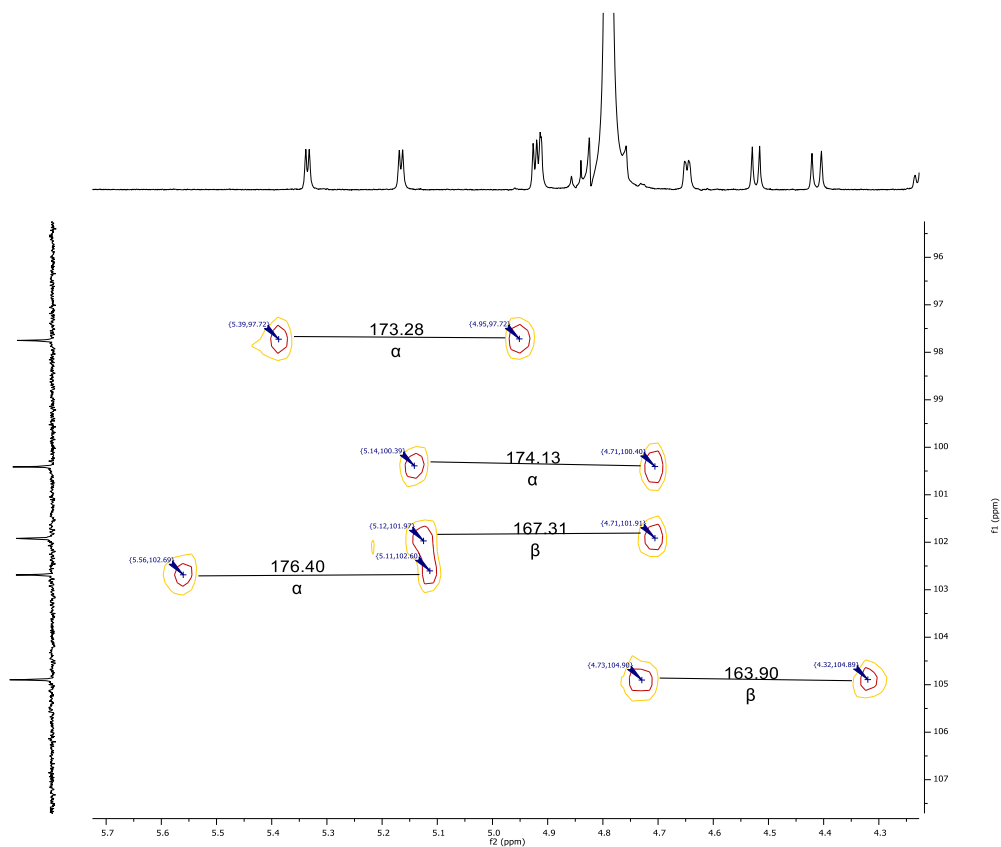

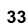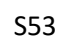

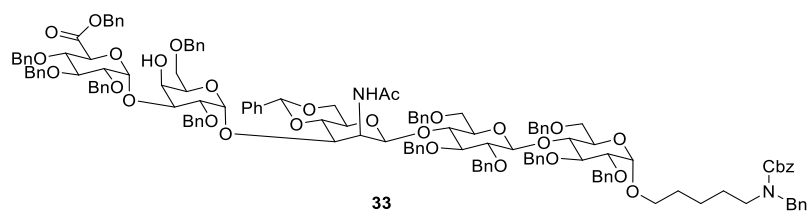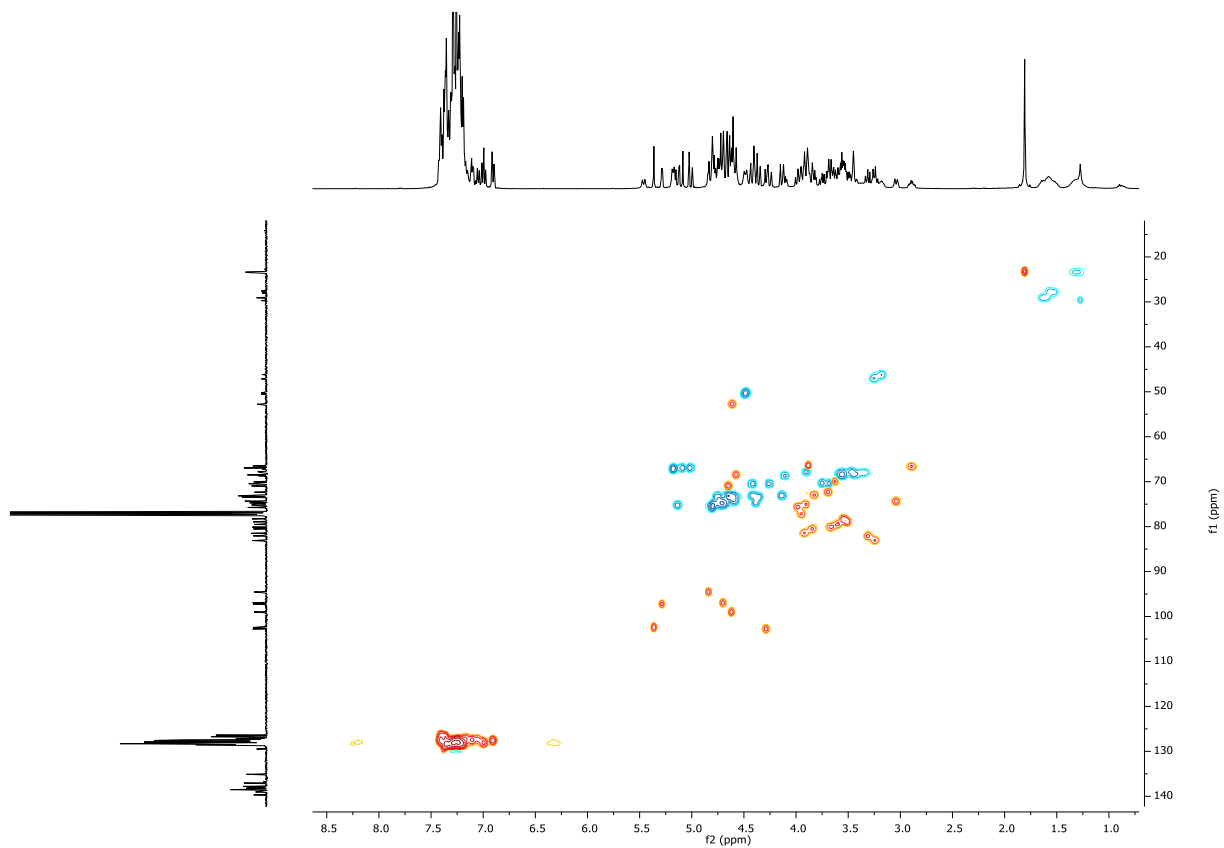

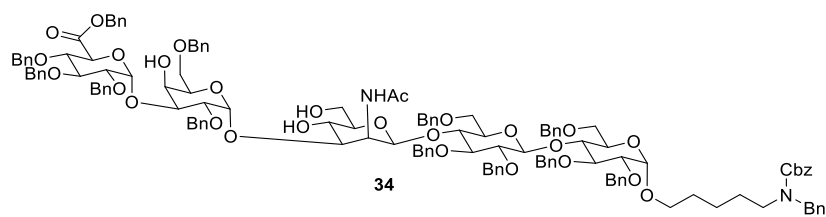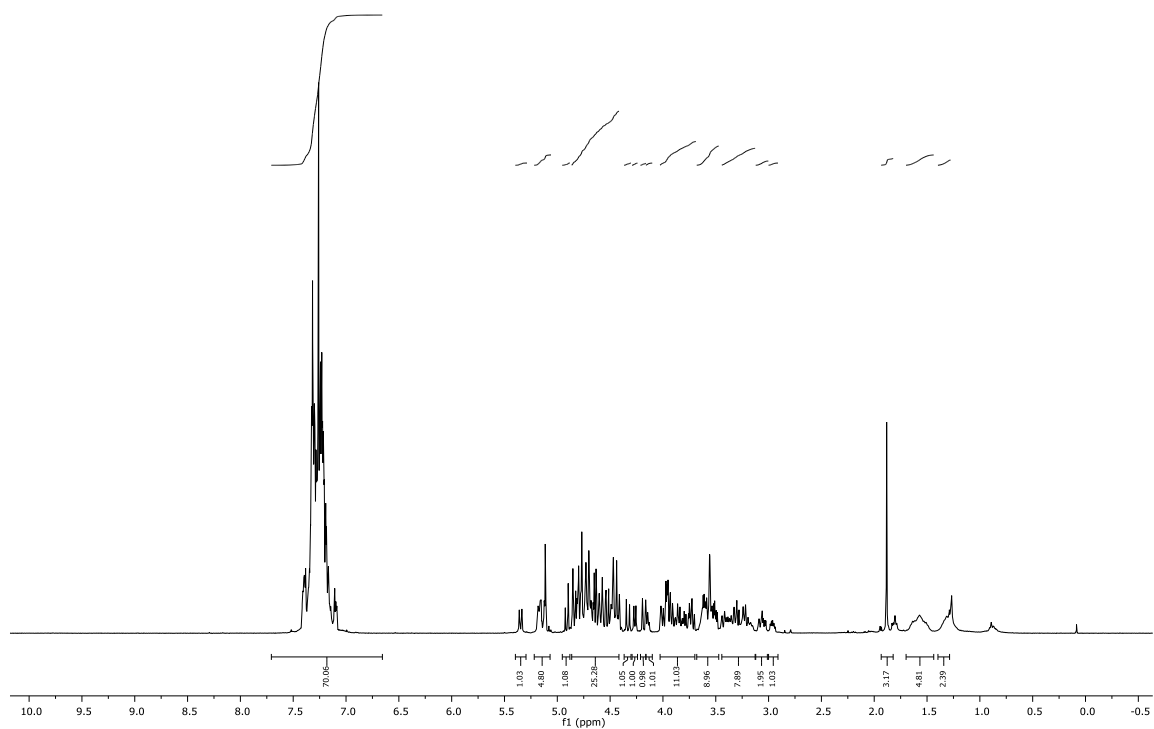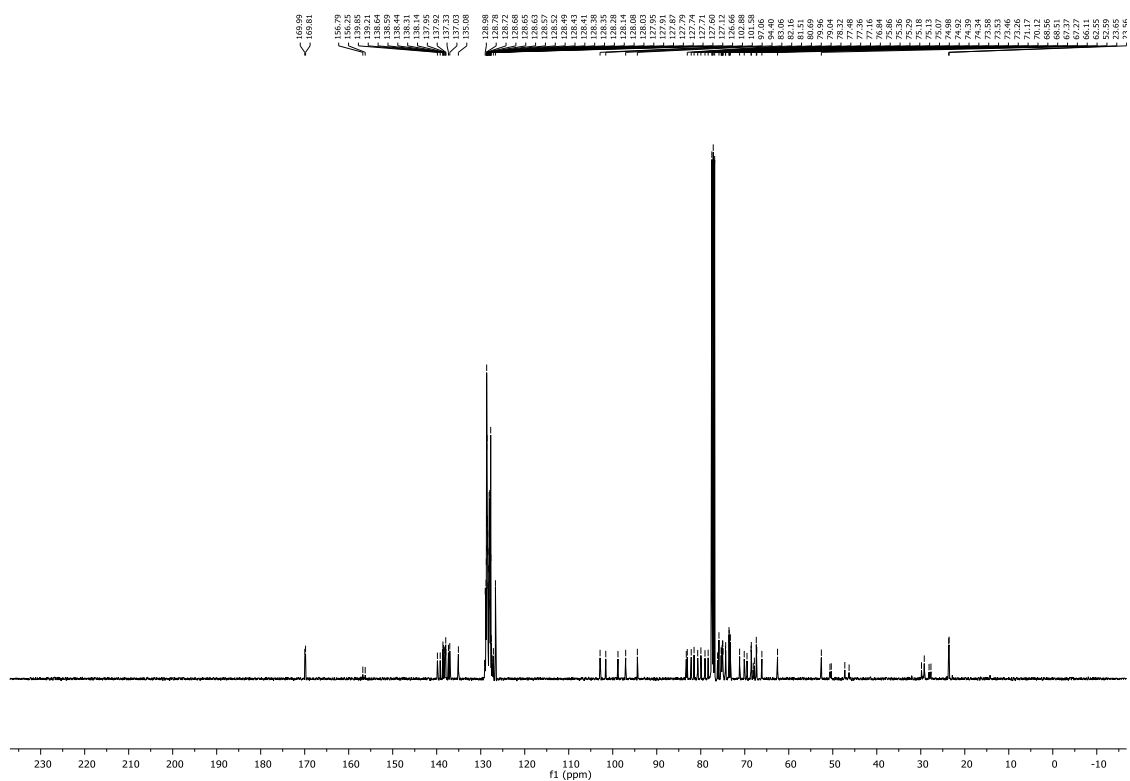

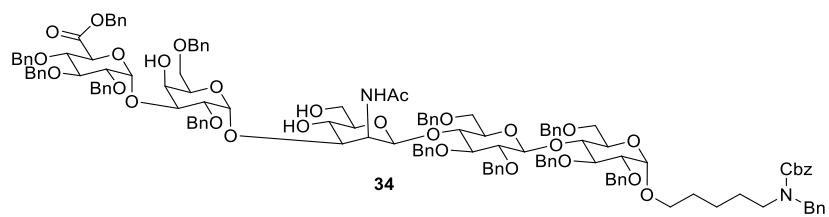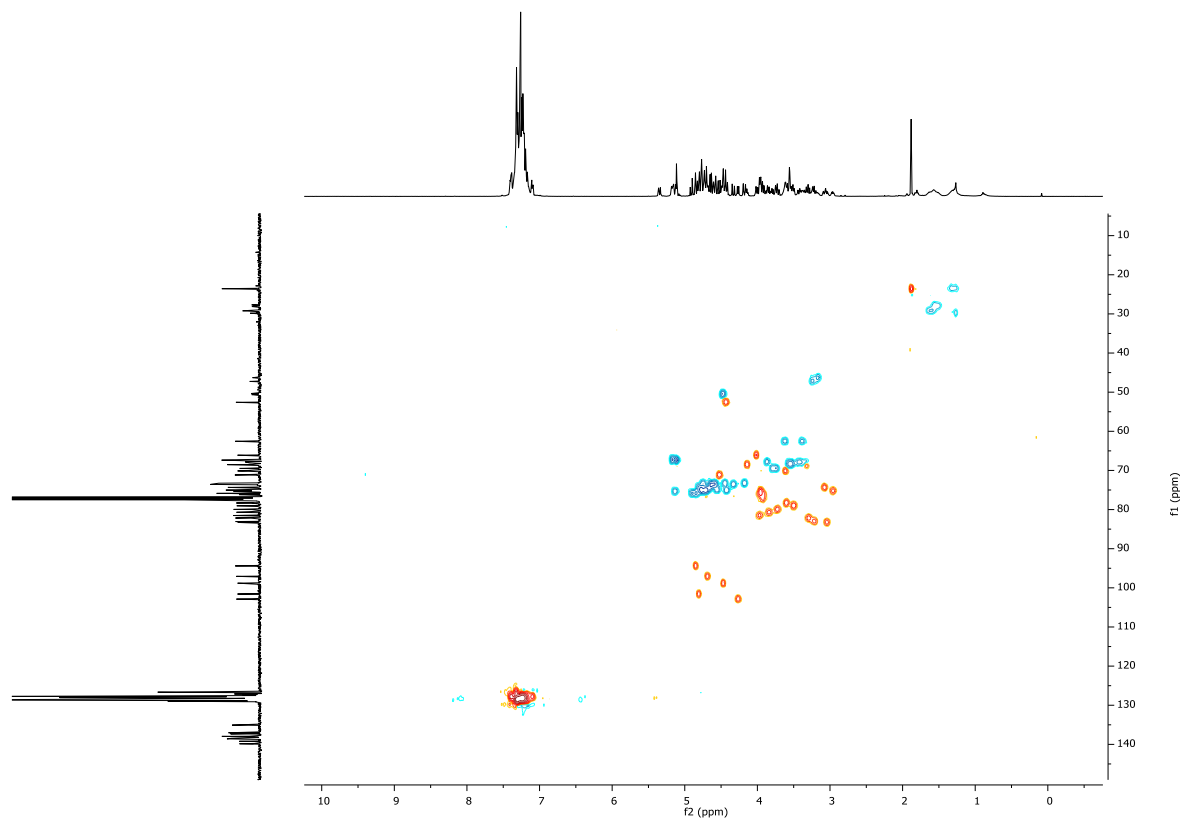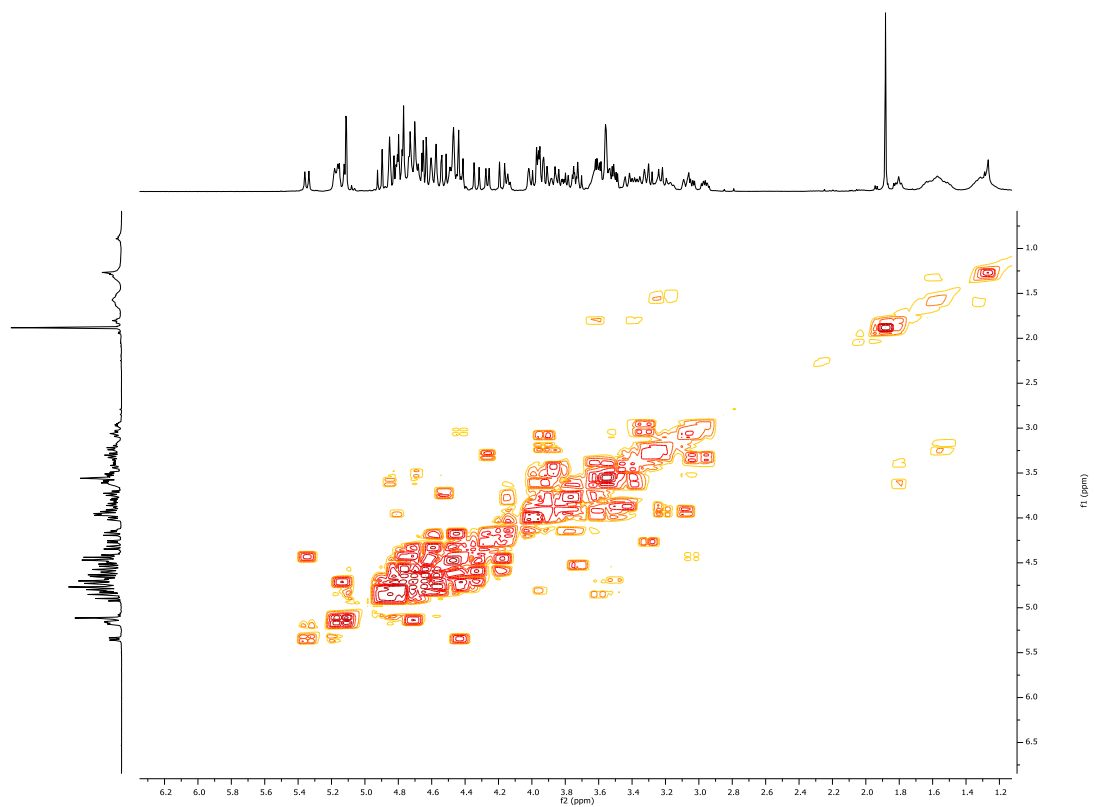

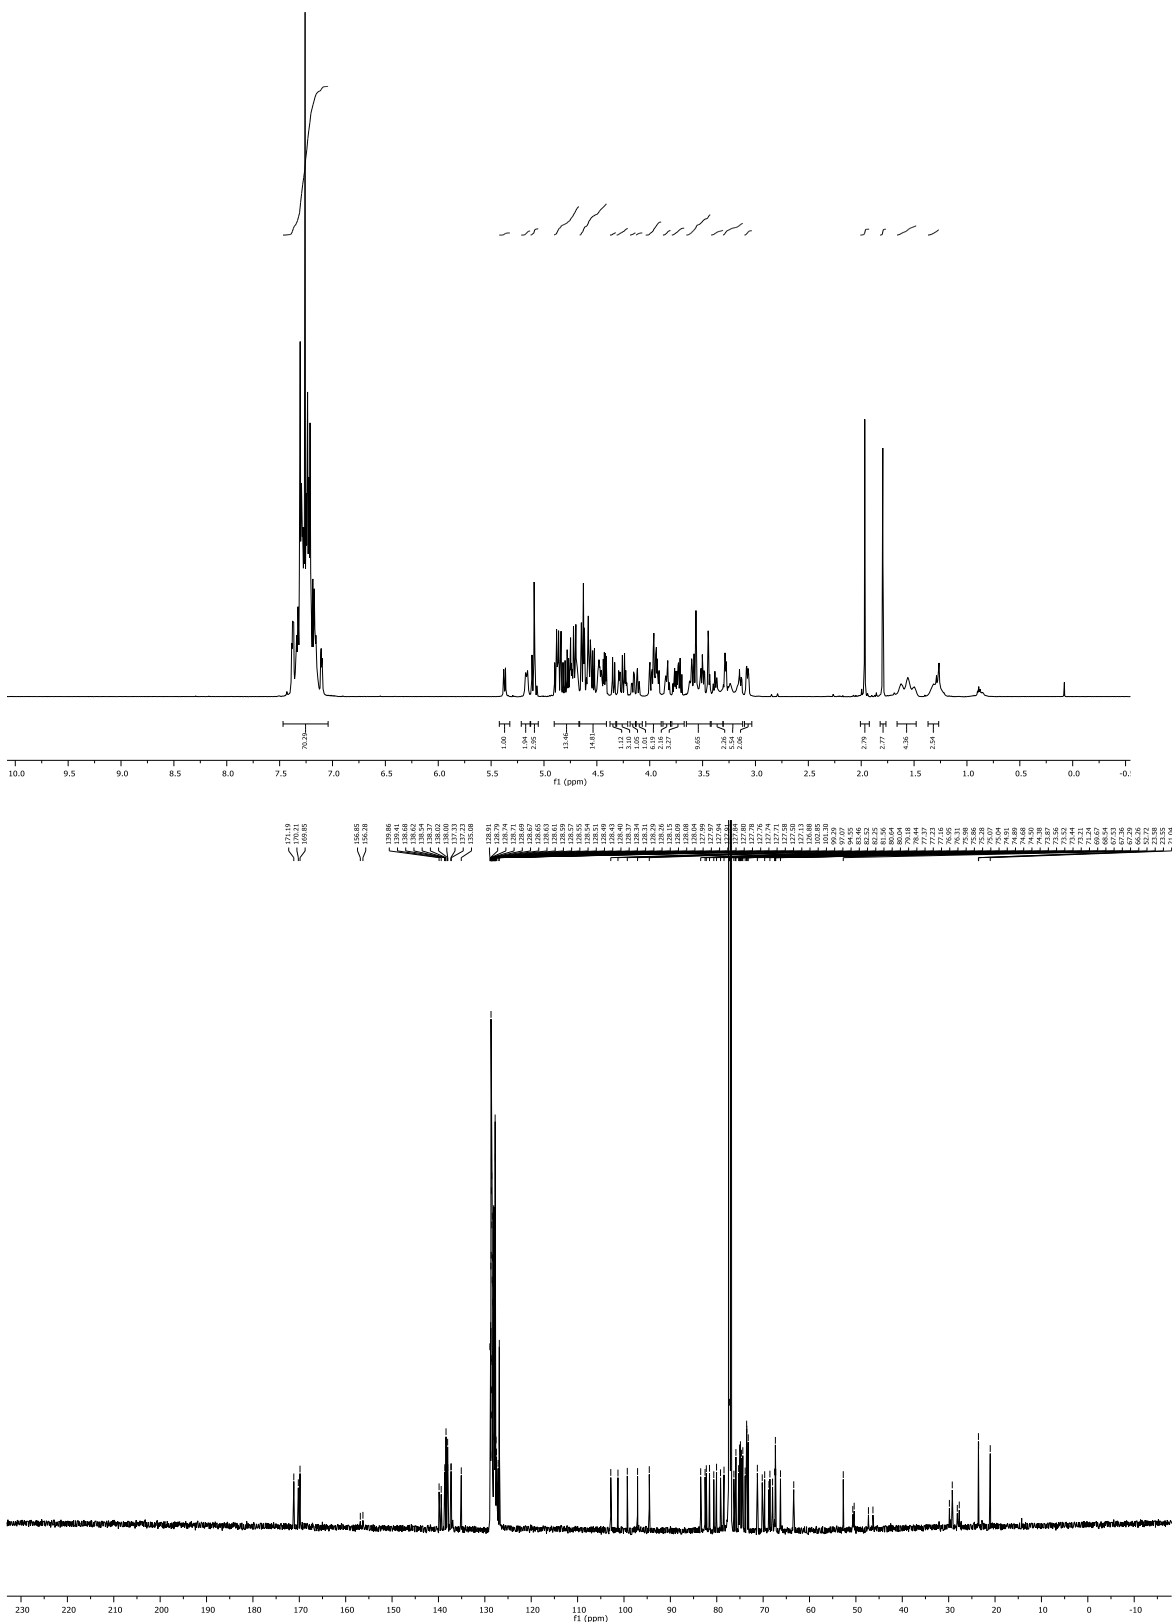

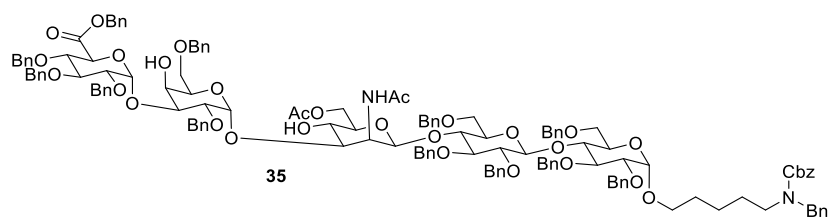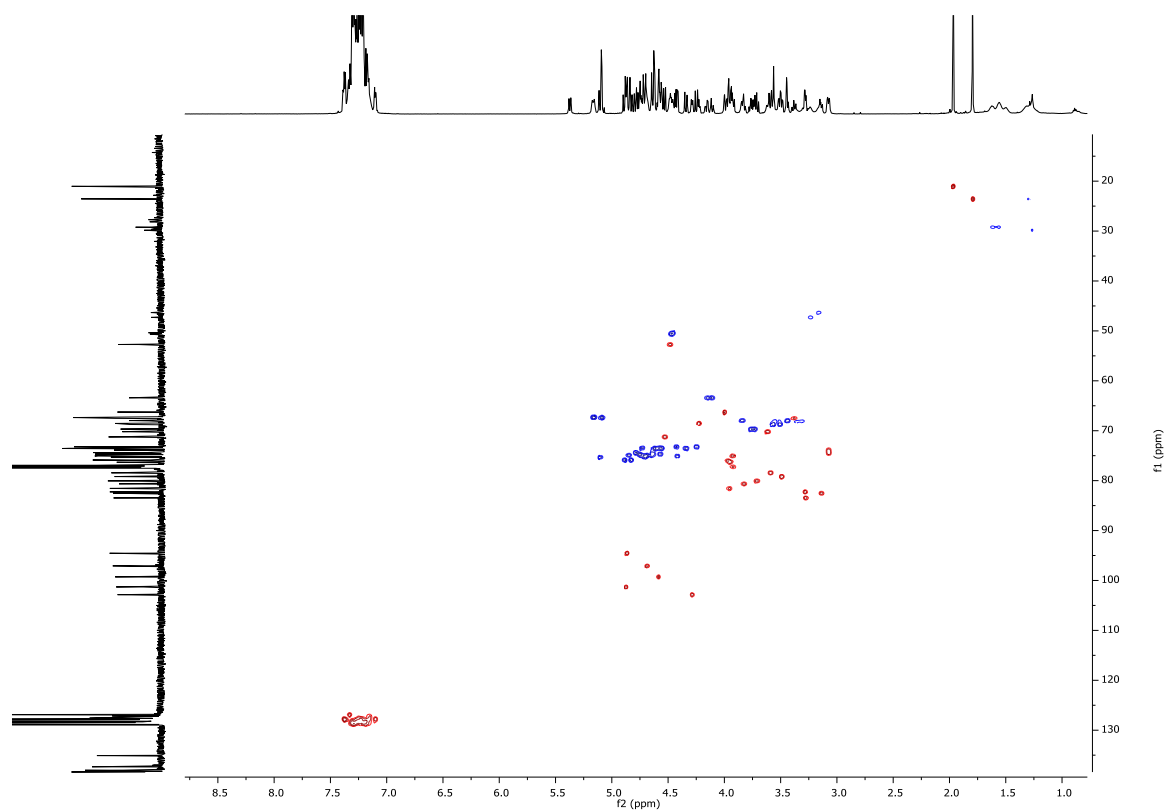

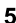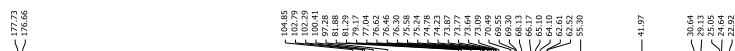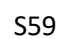



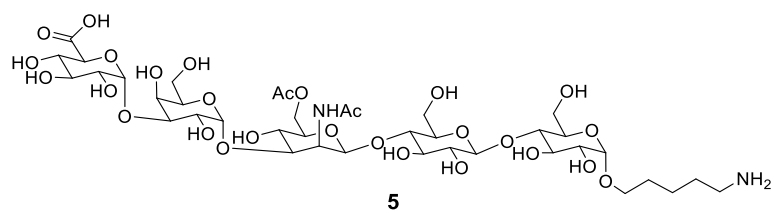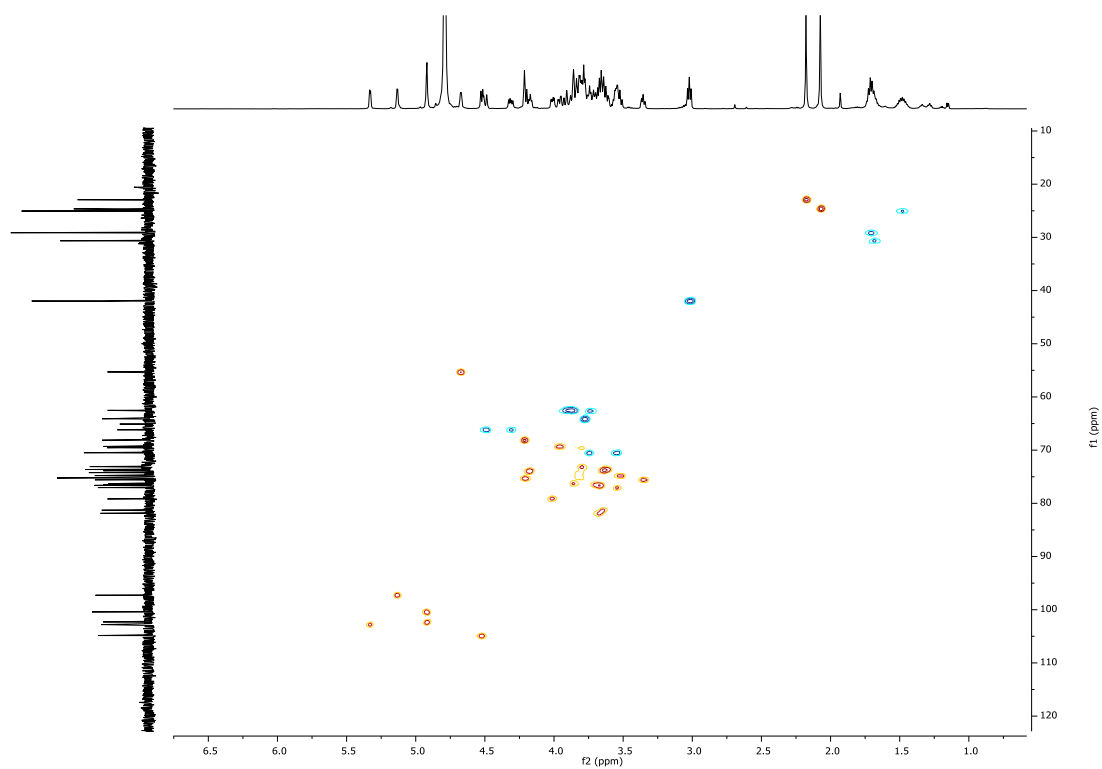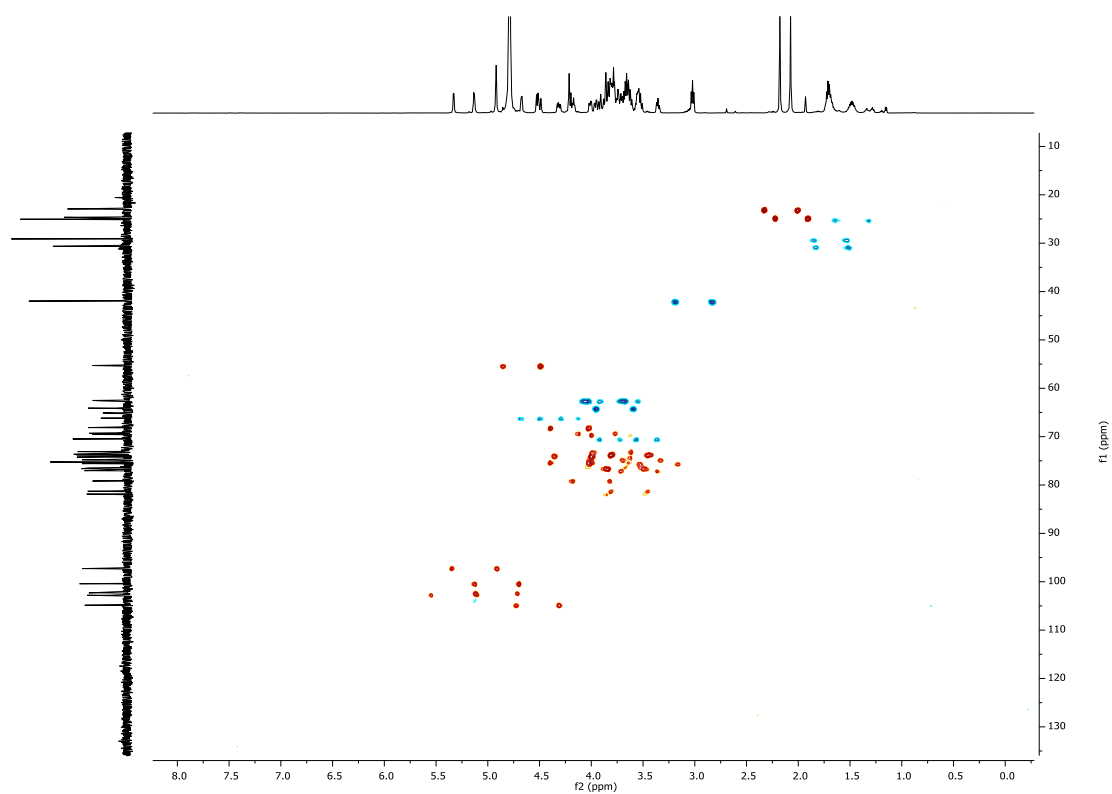

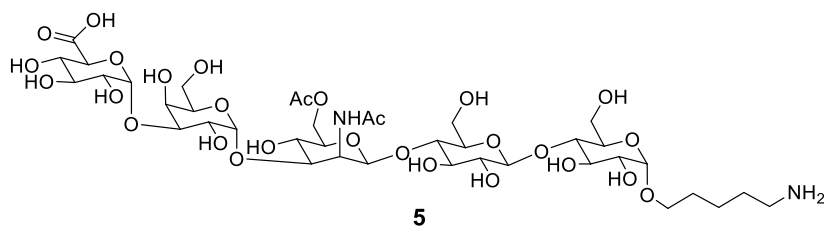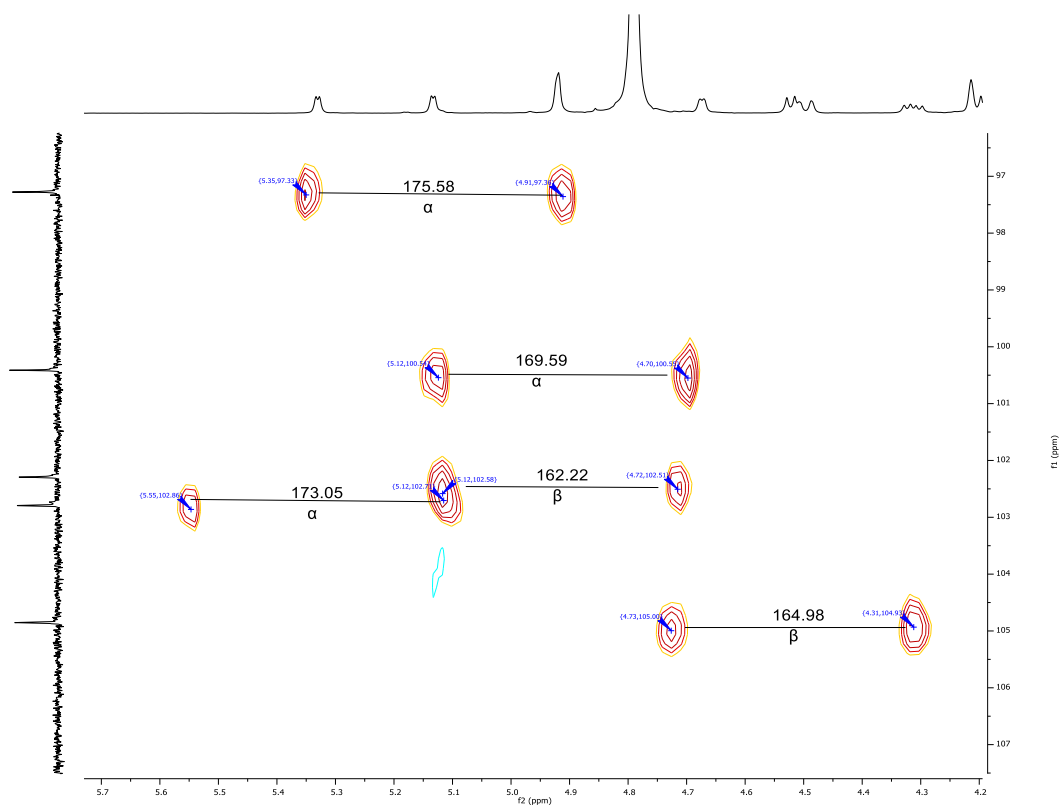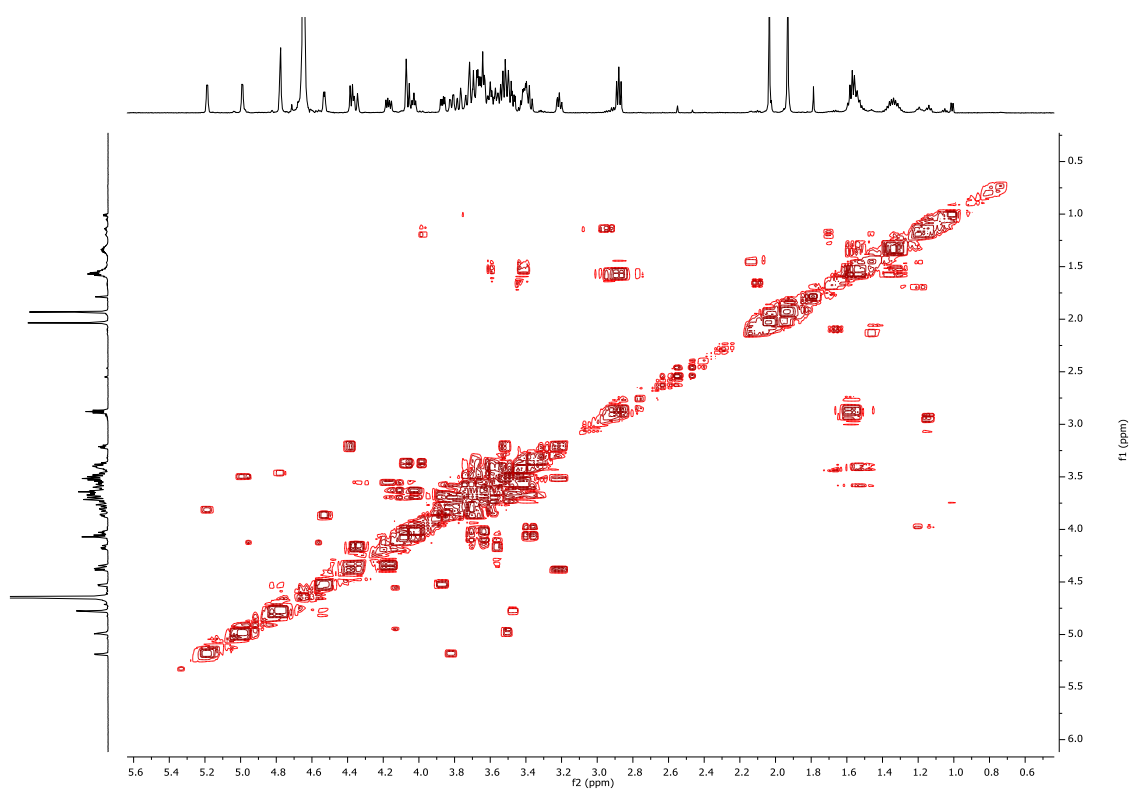

## Confirmation of ManNAc-6-OAc:

The HSQC spectra clearly shows the presence of methylene C6 peaks at 4.49 and 4.31 ppm in the case of **5** (blue) which in the case of **4** are present between 3.86–3.94 ppm (orange). Also the new acetyl peak is seen at 2.18 ppm (an overlay of the HSQC's of **4** and **5** is shown below).

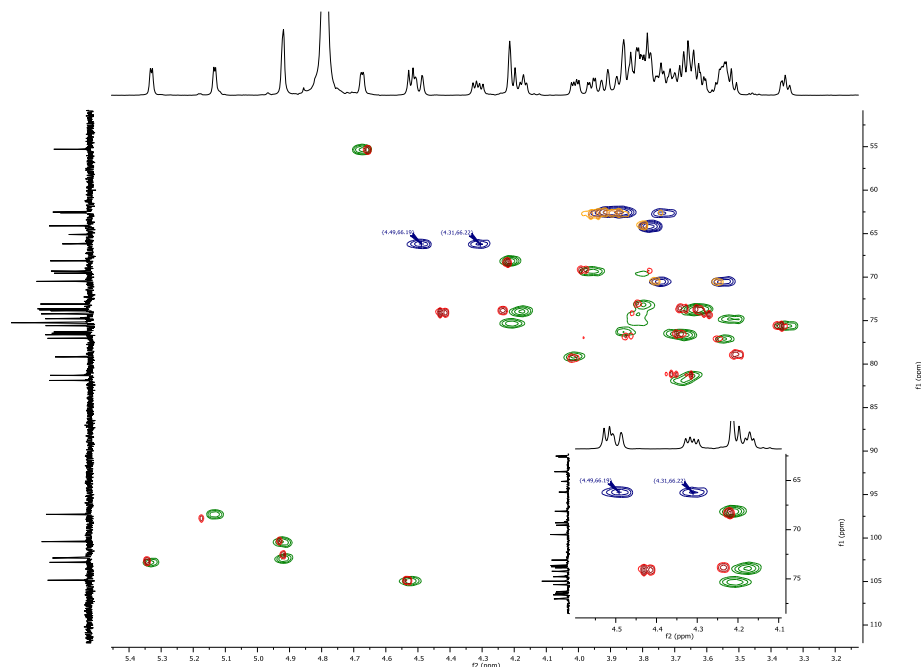

A comparison below of the  $^1\text{H}$  NMR spectrum with the literature reported confirms the C6 acylation (denoted by # at 4.49 and 4.31 ppm). For further details, please refer to Moon H. Nahm, et. al. *J. Biol. Chem.* **2012**, 287, 13996-14003 (Supporting Information Figure S3).

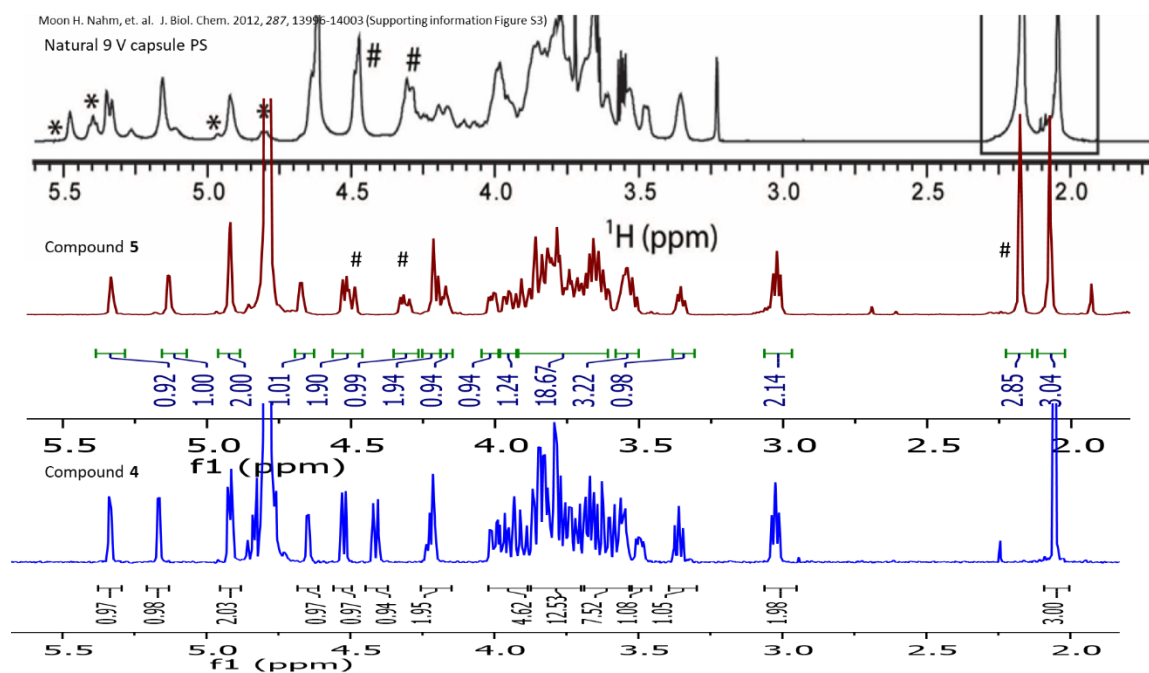

Supplement: Additional file 2 [file 1860-5397-16-140-S2.pdf]
